# Supplementary material for: Protein network analysis links the NSL complex to Parkinson’s disease via mitochondrial and nuclear biology
Source: Royal Society of Chemistry journal article supplement (doi:10.1039/d2mo00325b), 2023-06-14
Supplement: d2mo00325b2.xlsx [file d2mo00325b2.xlsx]

## Sheet: Supplementary Table 1
Seed:Gene Name	Seed: Entrez ID	Interactor:Gene Name	Seed: Entrez ID
MCRS1	10445	ACTL6A	86
OGT	8473	AK1	203
OGT	8473	ALAD	210
HCFC1	3054	ALDOC	230
WDR5	11091	APP	351
KANSL2	54934	APP	351
WDR5	11091	ARNTL	406
HCFC1	3054	ASCL2	430
KAT8	84148	ATM	472
WDR5	11091	RERE	473
WDR5	11091	ATP6V1B2	526
WDR5	11091	BARD1	580
WDR5	11091	BMI1	648
OGT	8473	BMI1	648
WDR5	11091	BRCA1	672
MCRS1	10445	BRCA1	672
OGT	8473	BRCA1	672
HCFC1	3054	BRCA1	672
OGT	8473	KLF5	688
HCFC1	3054	KLF5	688
KANSL3	55683	CAMK2D	817
HCFC1	3054	CAMK2D	817
OGT	8473	CAMK2D	817
WDR5	11091	CCT6A	908
KANSL1	284058	CDC5L	988
MCRS1	10445	CDH5	1003
HCFC1	3054	CDK2	1017
OGT	8473	CDK2	1017
KANSL1	284058	CDR2	1039
MCRS1	10445	CHD4	1108
WDR5	11091	CREBBP	1387
OGT	8473	CRKL	1399
WDR5	11091	CSE1L	1434
WDR5	11091	CSNK1E	1454
OGT	8473	CSNK2A1	1457
WDR5	11091	CSNK2A1	1457
WDR5	11091	CSNK2A2	1459
OGT	8473	CSNK2B	1460
MCRS1	10445	CSNK2B	1460
OGT	8473	CSTA	1475
WDR5	11091	CYLD	1540
OGT	8473	CYLD	1540
MCRS1	10445	DAXX	1616
KANSL1	284058	DHX8	1659
WDR5	11091	DR1	1810
WDR5	11091	ATN1	1822
MCRS1	10445	DVL2	1856
HCFC1	3054	E2F1	1869
HCFC1	3054	E2F3	1871
HCFC1	3054	E2F4	1874
WDR5	11091	E2F6	1876
WDR5	11091	ECT2	1894
MCRS1	10445	PHC2	1912
HCFC1	3054	EEF1D	1936
HCFC1	3054	EEF2	1938
WDR5	11091	EIF2D	1939
HCFC1	3054	EGFR	1956
HCFC1	3054	EGR2	1959
HCFC1	3054	ELAVL1	1994
WDR5	11091	EP300	2033
MCRS1	10445	FBL	2091
WDR5	11091	ESR1	2099
HCFC1	3054	ESR2	2100
KAT8	84148	ESR2	2100
KANSL3	55683	ESR2	2100
OGT	8473	ESR2	2100
MCRS1	10445	ESR2	2100
WDR5	11091	ESR2	2100
OGT	8473	FARSA	2193
HCFC1	3054	FHL2	2274
HCFC1	3054	GABPA	2551
HCFC1	3054	GABPB1	2553
WDR5	11091	KAT2A	2648
KANSL1	284058	GOLGA2	2801
WDR5	11091	H1-2	3006
KAT8	84148	H2AX	3014
WDR5	11091	H1-1	3024
WDR5	11091	HARS1	3035
OGT	8473	HCFC1	3054
HCFC1	3054	HCFC1	3054
WDR5	11091	HCFC1	3054
KAT8	84148	HCFC1	3054
OGT	8473	HTT	3064
MCRS1	10445	HTT	3064
WDR5	11091	HDAC1	3065
HCFC1	3054	HDAC1	3065
HCFC1	3054	HDAC2	3066
WDR5	11091	HDAC2	3066
WDR5	11091	HDGF	3068
WDR5	11091	HELLS	3070
HCFC1	3054	HIF1A	3091
OGT	8473	HIVEP1	3096
OGT	8473	HIVEP2	3097
WDR5	11091	FOXA1	3169
KAT8	84148	HNRNPA1	3178
KANSL3	55683	HNRNPL	3191
OGT	8473	HNRNPL	3191
OGT	8473	AGFG1	3267
WDR5	11091	HSF2	3298
HCFC1	3054	HSPA4	3308
HCFC1	3054	HSPA8	3312
OGT	8473	HSPA8	3312
KANSL1	284058	HSPB1	3315
HCFC1	3054	HSP90AA1	3320
HCFC1	3054	FOXN2	3344
OGT	8473	RBPJ	3516
KANSL1	284058	FOXK2	3607
MCRS1	10445	FOXK2	3607
HCFC1	3054	FOXK2	3607
KANSL3	55683	FOXK2	3607
KANSL2	54934	FOXK2	3607
WDR5	11091	ING2	3622
HCFC1	3054	IRF1	3659
HCFC1	3054	IRF2	3660
HCFC1	3054	JUN	3725
OGT	8473	KIF5B	3799
KANSL1	284058	KIFC3	3801
KANSL1	284058	KRT15	3866
OGT	8473	LPP	4026
OGT	8473	MAPT	4137
WDR5	11091	MAX	4149
MCRS1	10445	MAP3K5	4217
WDR5	11091	MEN1	4221
HCFC1	3054	MEN1	4221
KAT8	84148	KMT2A	4297
OGT	8473	KMT2A	4297
HCFC1	3054	KMT2A	4297
WDR5	11091	KMT2A	4297
WDR5	11091	MLLT1	4298
OGT	8473	FOXO4	4303
PHF20	51230	MOV10	4343
MCRS1	10445	TRIM37	4591
WDR5	11091	MYB	4602
WDR5	11091	MYC	4609
WDR5	11091	MYCN	4613
OGT	8473	NEDD8	4738
WDR5	11091	NEDD8	4738
OGT	8473	NFATC1	4772
MCRS1	10445	NFATC2	4773
MCRS1	10445	NFRKB	4798
MCRS1	10445	NOP2	4839
KANSL3	55683	CNOT2	4848
HCFC1	3054	NOTCH1	4851
HCFC1	3054	NTRK1	4914
WDR5	11091	NTRK1	4914
OGT	8473	NTRK1	4914
WDR5	11091	PAFAH1B1	5048
OGT	8473	PAFAH1B2	5049
WDR5	11091	PAX7	5081
MCRS1	10445	PBX2	5089
MCRS1	10445	PCM1	5108
HCFC1	3054	PDCD2	5134
WDR5	11091	PDPK1	5170
WDR5	11091	PIK3CA	5290
WDR5	11091	PITX2	5308
KAT8	84148	PLAU	5328
KAT8	84148	PLK1	5347
WDR5	11091	PML	5371
HCFC1	3054	POLR2J	5439
HCFC1	3054	POU2F1	5451
WDR5	11091	POU5F1	5460
HCFC1	3054	PPP1CA	5499
OGT	8473	PPP1CA	5499
OGT	8473	PPP1CB	5500
KAT8	84148	PPP1CB	5500
HCFC1	3054	PPP1CB	5500
WDR5	11091	PPP1CB	5500
OGT	8473	PPP1CC	5501
HCFC1	3054	PPP1CC	5501
HCFC1	3054	PPP2R2B	5521
MCRS1	10445	PRKAR1A	5573
WDR5	11091	PKN1	5585
KAT8	84148	PRKDC	5591
WDR5	11091	PRNP	5621
WDR5	11091	PSMA3	5684
WDR5	11091	PSMC5	5705
HCFC1	3054	PSMD7	5713
OGT	8473	PSPH	5723
MCRS1	10445	PTEN	5728
PHF20	51230	PTPN14	5784
HCFC1	3054	RBBP4	5928
KANSL1	284058	RBBP5	5929
KAT8	84148	RBBP5	5929
HCFC1	3054	RBBP5	5929
OGT	8473	RBBP5	5929
WDR5	11091	RBBP5	5929
HCFC1	3054	RBBP7	5931
OGT	8473	RELA	5970
MCRS1	10445	RET	5979
KANSL1	284058	TRIM27	5987
WDR5	11091	RING1	6015
WDR5	11091	RNF2	6045
KAT8	84148	RNF2	6045
HCFC1	3054	RNF4	6047
HCFC1	3054	RPA1	6117
HCFC1	3054	RPA2	6118
HCFC1	3054	RPA3	6119
WDR5	11091	RPL35A	6165
WDR5	11091	RPL37A	6168
MCRS1	10445	RTN2	6253
HCFC1	3054	SUMO2	6613
HCFC1	3054	SNRPB	6628
HCFC1	3054	SNRPN	6638
HCFC1	3054	SP1	6667
WDR5	11091	SRPK2	6733
WDR5	11091	SRY	6736
OGT	8473	SSR4	6748
KANSL3	55683	STAT5B	6777
OGT	8473	SURF2	6835
MCRS1	10445	SUV39H1	6839
WDR5	11091	TADA2A	6871
HCFC1	3054	TAF9	6880
HCFC1	3054	MAP3K7	6885
KAT8	84148	ELOA	6924
OGT	8473	TCF4	6925
WDR5	11091	TCP1	6950
WDR5	11091	TERF2	7014
MCRS1	10445	TERT	7015
WDR5	11091	TFDP1	7027
WDR5	11091	TGFB1	7040
MCRS1	10445	TNFRSF1A	7132
PHF20	51230	TP53	7157
KAT8	84148	TP53	7157
WDR5	11091	TP53	7157
KAT8	84148	TP53BP1	7158
OGT	8473	TPD52L2	7165
KANSL1	284058	TPM2	7169
KAT8	84148	TPR	7175
HCFC1	3054	NR2C1	7181
HCFC1	3054	NR2C2	7182
KANSL1	284058	TRAF1	7185
KANSL1	284058	TRAF2	7186
WDR5	11091	TRAF3	7187
WDR5	11091	TRAF6	7189
WDR5	11091	CCT3	7203
OGT	8473	CCT3	7203
WDR5	11091	TSG101	7251
WDR5	11091	TTK	7272
KANSL2	54934	TULP3	7289
MCRS1	10445	TULP3	7289
OGT	8473	HIRA	7290
WDR5	11091	TWIST1	7291
WDR5	11091	UBE3A	7337
OGT	8473	SUMO1	7341
MCRS1	10445	UBTF	7343
WDR5	11091	USF1	7391
HCFC1	3054	USF1	7391
WDR5	11091	USP1	7398
WDR5	11091	KDM6A	7403
WDR5	11091	XPO1	7514
MCRS1	10445	XPO1	7514
OGT	8473	YES1	7525
MCRS1	10445	YY1	7528
HCFC1	3054	YY1	7528
KAT8	84148	YWHAE	7531
OGT	8473	YWHAH	7533
KAT8	84148	YWHAZ	7534
PHF20	51230	TRIM25	7706
KANSL3	55683	TRIM25	7706
KANSL2	54934	TRIM25	7706
OGT	8473	TRIM25	7706
KANSL1	284058	TRIM25	7706
HCFC1	3054	ZBTB17	7709
OGT	8473	USP7	7874
WDR5	11091	KAT6A	7994
WDR5	11091	KMT2D	8085
MCRS1	10445	FXR1	8087
OGT	8473	UBL4A	8266
WDR5	11091	H3-4	8290
HCFC1	3054	BAP1	8314
MCRS1	10445	BAP1	8314
OGT	8473	BAP1	8314
WDR5	11091	NA	8350
PHF20	51230	NA	8350
KAT8	84148	NA	8350
KAT8	84148	NA	8359
PHF20	51230	NA	8359
PHF20	51230	NA	8370
WDR5	11091	CUL4B	8450
WDR5	11091	CUL4A	8451
HCFC1	3054	CUL3	8452
WDR5	11091	CUL3	8452
WDR5	11091	CUL1	8454
OGT	8473	OGT	8473
KAT8	84148	OGT	8473
HCFC1	3054	OGT	8473
WDR5	11091	OGT	8473
WDR5	11091	IKBKG	8517
OGT	8473	PDXK	8566
MCRS1	10445	RUVBL1	8607
OGT	8473	URI1	8725
HCFC1	3054	EED	8726
WDR5	11091	HDAC3	8841
WDR5	11091	KAT2B	8850
OGT	8473	ZPR1	8882
OGT	8473	BTRC	8945
HCFC1	3054	BTRC	8945
WDR5	11091	NA	8968
PHF20	51230	NA	8968
WDR5	11091	PRC1	9055
HCFC1	3054	ASH2L	9070
OGT	8473	ASH2L	9070
WDR5	11091	ASH2L	9070
OGT	8473	UNC119	9094
KAT8	84148	DYRK1B	9149
OGT	8473	FIBP	9158
WDR5	11091	ARHGEF2	9181
MCRS1	10445	ZBTB22	9278
OGT	8473	SNAP29	9342
WDR5	11091	EFTUD2	9343
OGT	8473	EFTUD2	9343
WDR5	11091	CIAO1	9391
WDR5	11091	SNRNP40	9410
WDR5	11091	KIF23	9493
MCRS1	10445	FXR2	9513
HCFC1	3054	NFE2L3	9603
OGT	8473	SETD1A	9739
WDR5	11091	SETD1A	9739
HCFC1	3054	SETD1A	9739
WDR5	11091	KMT2B	9757
OGT	8473	HDAC5	10014
HCFC1	3054	HDAC5	10014
WDR5	11091	HDAC5	10014
WDR5	11091	PDCD6IP	10015
OGT	8473	TOM1L1	10040
OGT	8473	FARSB	10056
OGT	8473	HUWE1	10075
OGT	8473	ACTR2	10097
WDR5	11091	YAF2	10138
HCFC1	3054	TRIM28	10155
KAT8	84148	TNK2	10188
KANSL1	284058	CALCOCO2	10241
WDR5	11091	AKAP8	10270
MCRS1	10445	IKZF1	10320
PHF20	51230	TFG	10342
WDR5	11091	YAP1	10413
WDR5	11091	PRMT5	10419
MCRS1	10445	PRMT5	10419
OGT	8473	MCRS1	10445
WDR5	11091	MCRS1	10445
PHF20	51230	MCRS1	10445
KANSL1	284058	MCRS1	10445
KAT8	84148	MCRS1	10445
OGT	8473	TAB1	10454
KANSL1	284058	ECI2	10455
WDR5	11091	TADA3	10474
PHF20	51230	NXF1	10482
OGT	8473	NXF1	10482
OGT	8473	CREB3	10488
HCFC1	3054	CREB3	10488
OGT	8473	CARM1	10498
WDR5	11091	CARM1	10498
WDR5	11091	MYBBP1A	10514
WDR5	11091	CCT7	10574
WDR5	11091	CCT4	10575
OGT	8473	CCT2	10576
WDR5	11091	CCT2	10576
HCFC1	3054	HEXIM1	10614
KANSL1	284058	CTCF	10664
WDR5	11091	CCT8	10694
OGT	8473	OGA	10724
OGT	8473	GIPC1	10755
OGT	8473	WDR4	10785
MCRS1	10445	RUVBL2	10856
HCFC1	3054	PPARGC1A	10891
WDR5	11091	EHMT2	10919
KAT8	84148	MORF4L1	10933
KAT8	84148	MSL3	10943
WDR5	11091	CBX1	10951
WDR5	11091	COPS5	10987
WDR5	11091	KIF2C	11004
KANSL1	284058	CCDC85B	11007
MCRS1	10445	CCDC85B	11007
WDR5	11091	WWP2	11060
OGT	8473	DIDO1	11083
MCRS1	10445	WDR5	11091
KANSL3	55683	WDR5	11091
KANSL1	284058	WDR5	11091
HCFC1	3054	WDR5	11091
KANSL2	54934	WDR5	11091
OGT	8473	WDR5	11091
KAT8	84148	WDR5	11091
PHF20	51230	WDR5	11091
WDR5	11091	PTPN21	11099
MCRS1	10445	LSM6	11157
KAT8	84148	BAZ2A	11176
OGT	8473	GPN1	11321
PHF20	51230	DDX42	11325
WDR5	11091	CBX3	11335
OGT	8473	TRAK1	22906
WDR5	11091	SNW1	22938
OGT	8473	CCT5	22948
WDR5	11091	CCT5	22948
WDR5	11091	PAXIP1	22976
KANSL1	284058	KDM1A	23028
MCRS1	10445	KDM1A	23028
WDR5	11091	KDM4B	23030
WDR5	11091	NCOA6	23054
HCFC1	3054	NCOA6	23054
WDR5	11091	SETD1B	23067
WDR5	11091	PHF8	23133
OGT	8473	PHF8	23133
HCFC1	3054	PHF8	23133
WDR5	11091	KDM6B	23135
WDR5	11091	PASK	23178
WDR5	11091	MGA	23269
OGT	8473	FBXW11	23291
HCFC1	3054	FBXW11	23291
HCFC1	3054	SIN3B	23309
MCRS1	10445	SASH1	23328
OGT	8473	SMCHD1	23347
MCRS1	10445	UBR4	23352
HCFC1	3054	NUDCD3	23386
KAT8	84148	SIRT1	23411
WDR5	11091	RYBP	23429
KAT8	84148	BRD4	23476
HCFC1	3054	DDAH2	23564
OGT	8473	DDAH2	23564
OGT	8473	NUP62	23636
KANSL1	284058	NUP62	23636
OGT	8473	HSPBP1	23640
KANSL2	54934	PPIL2	23759
KANSL1	284058	TFIP11	24144
KANSL3	55683	SAMHD1	25939
HCFC1	3054	SIN3A	25942
OGT	8473	SIN3A	25942
HCFC1	3054	VIRMA	25962
WDR5	11091	MOXD1	26002
WDR5	11091	ZZZ3	26009
WDR5	11091	AUTS2	26053
WDR5	11091	SERBP1	26135
KANSL1	284058	TRAF3IP1	26146
WDR5	11091	SENP3	26168
OGT	8473	NPHP3	27031
MCRS1	10445	INTU	27152
KANSL1	284058	DISC1	27185
WDR5	11091	TNRC6A	27327
OGT	8473	DBNL	28988
MCRS1	10445	MED4	29079
WDR5	11091	RACGAP1	29127
MCRS1	10445	TFPT	29844
OGT	8473	UBN1	29855
WDR5	11091	SAC3D1	29901
KANSL1	284058	HOOK2	29911
HCFC1	3054	HCFC2	29915
OGT	8473	HCFC2	29915
WDR5	11091	HCFC2	29915
WDR5	11091	CXXC1	30827
OGT	8473	CXXC1	30827
HCFC1	3054	CXXC1	30827
OGT	8473	WRAP73	49856
MCRS1	10445	COPS7A	50813
KAT8	84148	FOXP3	50943
MCRS1	10445	WASHC3	51019
OGT	8473	LAP3	51056
KANSL1	284058	PHF20L1	51105
KAT8	84148	PHF20L1	51105
KANSL2	54934	PHF20	51230
KANSL3	55683	PHF20	51230
KAT8	84148	PHF20	51230
KANSL1	284058	PHF20	51230
MCRS1	10445	PHF20	51230
WDR5	11091	PHF20	51230
MCRS1	10445	UBR5	51366
MCRS1	10445	UCHL5	51377
OGT	8473	PPME1	51400
WDR5	11091	HACD3	51495
OGT	8473	HACD3	51495
OGT	8473	RTF2	51507
WDR5	11091	DTL	51514
HCFC1	3054	SIRT7	51547
WDR5	11091	MBIP	51562
MCRS1	10445	WBP11	51729
OGT	8473	WWOX	51741
PHF20	51230	POLE3	54107
WDR5	11091	TERF2IP	54386
WDR5	11091	NLE1	54475
KANSL1	284058	PLEKHA5	54477
HCFC1	3054	USP53	54532
OGT	8473	RC3H2	54542
KANSL1	284058	NECAB2	54550
WDR5	11091	WDR5B	54554
MCRS1	10445	INO80	54617
KAT8	84148	PAF1	54623
HCFC1	3054	MPHOSPH8	54737
KANSL2	54934	TRIM44	54765
MCRS1	10445	TRIM44	54765
OGT	8473	TET2	54790
OGT	8473	NUP62CL	54830
MCRS1	10445	INO80D	54891
KANSL1	284058	DUS2	54920
KANSL1	284058	KANSL2	54934
OGT	8473	KANSL2	54934
PHF20	51230	KANSL2	54934
WDR5	11091	KANSL2	54934
MCRS1	10445	PINX1	54984
OGT	8473	HCFC1R1	54985
HCFC1	3054	HCFC1R1	54985
HCFC1	3054	PIH1D1	55011
OGT	8473	PIH1D1	55011
HCFC1	3054	THAP1	55145
OGT	8473	THAP1	55145
WDR5	11091	CEP55	55165
KAT8	84148	MSL2	55167
HCFC1	3054	ASXL2	55252
OGT	8473	ASXL2	55252
OGT	8473	PSPC1	55269
HCFC1	3054	FOXRED1	55572
WDR5	11091	PRR5	55615
WDR5	11091	CHD7	55636
OGT	8473	KANSL3	55683
WDR5	11091	KANSL3	55683
PHF20	51230	KANSL3	55683
WDR5	11091	YEATS2	55689
WDR5	11091	CEP72	55722
HCFC1	3054	ASF1B	55723
WDR5	11091	VPS35	55737
WDR5	11091	WDR12	55759
OGT	8473	SPATA7	55812
WDR5	11091	CAND1	55832
WDR5	11091	UNC45A	55898
OGT	8473	KMT2E	55904
HCFC1	3054	KMT2E	55904
OGT	8473	KCMF1	56888
KANSL3	55683	ANKMY2	57037
WDR5	11091	CHMP1B	57132
OGT	8473	SMURF1	57154
HCFC1	3054	THAP11	57215
OGT	8473	THAP11	57215
WDR5	11091	KAT14	57325
WDR5	11091	MAVS	57506
KAT8	84148	HECW2	57520
WDR5	11091	CHD8	57680
KAT8	84148	CCAR2	57805
WDR5	11091	NFE4	58160
HCFC1	3054	CREBZF	58487
OGT	8473	RPRD1B	58490
WDR5	11091	KMT2C	58508
KANSL2	54934	GPBP1L1	60313
MCRS1	10445	GPBP1L1	60313
WDR5	11091	ZNF335	63925
HCFC1	3054	ZNF335	63925
KANSL2	54934	NECAB1	64168
MCRS1	10445	NECAB1	64168
OGT	8473	P3H1	64175
WDR5	11091	COP1	64326
HCFC1	3054	SUDS3	64426
KANSL2	54934	DCLRE1B	64858
MCRS1	10445	MRPS15	64960
WDR5	11091	MRPL11	65003
MCRS1	10445	GPBP1	65056
OGT	8473	TRAK2	66008
MCRS1	10445	KXD1	79036
WDR5	11091	MAPKAP1	79109
WDR5	11091	ZXDC	79364
WDR5	11091	PAGR1	79447
MCRS1	10445	GCC1	79571
WDR5	11091	WDR59	79726
WDR5	11091	AGMAT	79814
MCRS1	10445	ACTR5	79913
WDR5	11091	WDR26	80232
OGT	8473	TET1	80312
KANSL1	284058	CEP70	80321
WDR5	11091	WDR82	80335
HCFC1	3054	WDR82	80335
WDR5	11091	WDR61	80349
MCRS1	10445	CEP44	80817
WDR5	11091	INO80B	83444
MCRS1	10445	INO80B	83444
OGT	8473	THAP2	83591
HCFC1	3054	THAP2	83591
WDR5	11091	SESN2	83667
KANSL2	54934	FERMT3	83706
WDR5	11091	GRWD1	83743
WDR5	11091	L3MBTL2	83746
MCRS1	10445	USHBP1	83878
WDR5	11091	PCGF6	84108
WDR5	11091	SLC7A6OS	84138
OGT	8473	KAT8	84148
KANSL1	284058	KAT8	84148
PHF20	51230	KAT8	84148
HCFC1	3054	KAT8	84148
WDR5	11091	KAT8	84148
KAT8	84148	KAT8	84148
MCRS1	10445	KAT8	84148
OGT	8473	GON7	84520
WDR5	11091	DPY30	84661
HCFC1	3054	DPY30	84661
OGT	8473	TUBA1C	84790
OGT	8473	UNK	85451
WDR5	11091	PPP1R3F	89801
OGT	8473	THAP3	90326
HCFC1	3054	THAP3	90326
WDR5	11091	PYGO2	90780
WDR5	11091	BOD1	91272
WDR5	11091	SPECC1	92521
WDR5	11091	HELB	92797
MCRS1	10445	ACTR8	93973
HCFC1	3054	EGLN3	112399
OGT	8473	EGLN3	112399
WDR5	11091	SGF29	112869
OGT	8473	LRRK2	120892
WDR5	11091	LRRK2	120892
HCFC1	3054	LRRK2	120892
MCRS1	10445	FSD2	123722
KANSL1	284058	FSD2	123722
MCRS1	10445	INO80C	125476
HCFC1	3054	PPARGC1B	133522
WDR5	11091	FAM199X	139231
OGT	8473	CIART	148523
OGT	8473	RC3H1	149041
KAT8	84148	MSL3P1	151507
KANSL2	54934	GPR156	165829
MCRS1	10445	GPR156	165829
OGT	8473	ASXL1	171023
HCFC1	3054	ASXL1	171023
OGT	8473	TET3	200424
PHF20	51230	PATL1	219988
OGT	8473	KDM1B	221656
WDR5	11091	KDM1B	221656
HCFC1	3054	FOXK1	221937
WDR5	11091	RICTOR	253260
WDR5	11091	BOD1L1	259282
MCRS1	10445	INO80E	283899
KAT8	84148	KANSL1	284058
KANSL2	54934	KANSL1	284058
PHF20	51230	KANSL1	284058
WDR5	11091	KANSL1	284058
OGT	8473	KANSL1	284058
MCRS1	10445	KANSL1	284058
WDR5	11091	MSL1	339287
KAT8	84148	MSL1	339287
WDR5	11091	WDR53	348793
PHF20	51230	NA	554313
OGT	8473	SAP25	100316904
