# Supplementary material for: Protein network analysis links the NSL complex to Parkinson’s disease via mitochondrial and nuclear biology
Source: Royal Society of Chemistry journal article supplement (doi:10.1039/d2mo00325b), 2023-06-14
Supplement: d2mo00325b3.xlsx [file d2mo00325b3.xlsx]

## Sheet: PINOT method conversion
Key	Code	Group_Name_	Members	Retained/Excluded
* = reported within the HIPPIE PPI list alongside the method code	MI:0019	Co-immunoprecipitation	Co-immunoprecipitation
/ = Method group name allocated according to semantic similarity	MI:0006	Co-immunoprecipitation	Anti-bait_coIP
Retained	MI:0007	Co-immunoprecipitation	Anti-tag_coIP
Excluded	MI:0858	Co-immunoprecipitation	Immunodepleted_coimmunoprecipitation
	MI:0096	Affinity_Purification_&_Mass_Spectrometry	Pull_Down_
	MI:0676	Affinity_Purification_&_Mass_Spectrometry	Tandem_Affinity_Puritication
	MI:0059	Affinity_Purification_&_Mass_Spectrometry	GST_Pulldown
	MI:0944	Affinity_Purification_&_Mass_Spectrometry	mass_spectrometry_study_of_hydrogen/deuterium_exchange
	MI:0061	Affinity_Purification_&_Mass_Spectrometry	His_pull_down
	MI:0069	Affinity_Purification_&_Mass_Spectrometry	MS_of_complexes
	MI:1246	Affinity_Purification_&_Mass_Spectrometry	ion_mobility_mass_spectrometry_of_complexes
	MI:0943	Affinity_Purification_&_Mass_Spectrometry	Detection_by_MS
	MI:0963	Affinity_Purification_&_Mass_Spectrometry	Interactome_parallel_affinity_capture
	MI:0415	Enzyme	Enzymatic_Assay
	MI:0424	Enzyme	Protein_Kinase_Assay
	MI:0434	Enzyme	Phosphatase_Assay
	MI:1019	Enzyme	Protein_Phosphatase_Assay
	MI:0990	Enzyme	Clevage_Assay
	MI:0423	Enzyme	In-gel_kinase_assay
	MI:0435	Enzyme	Protease_assay
	MI:1000	Enzyme	hydroxylase_assay
	MI:0512	Enzyme	zymography
	MI:0880	Enzyme	ATP_ase_assay
	MI:0194	Enzyme	Cleavage_reaction
	MI:0203	Enzyme	Dephosphorylation_reaction
	MI:0514	Enzyme	In_gel_phosphatase_assay
	MI:0953	Enzyme	Polymerization
	MI:0841	Enzyme	Phosphotransferase_assay
	MI:0425	Enzyme	Kinase_scintillation_proximity_assay
	MI:0566	Enzyme	Sumoylation_reaction
	MI:0406	Enzyme	Deacetylase_assay
	MI:1010	Enzyme	Neddylase_assay
	MI:0920	Enzyme	ribonuclease_assay
	MI:0192	Enzyme	Acetylation_reaction
	MI:0889	Enzyme	Acetylase_assay
	MI:0220	Enzyme	Ubiquitination_Reaction
	MI:0443	Enzyme	Ubiquitin_Binding
	MI:0997	Enzyme	Ubiquitinase_Assay
	MI:0991	Enzyme	lipoprotein_cleavage_assay
	MI:0949	Enzyme	GTP/GDP_Exchange_assay
	MI:1008	Enzyme	Sumoylation_assay
	MI:0419	Enzyme	GTPase_assay
	MI:0998	Enzyme	Deubiquitinase_assay
	MI:0089	Arrays	Protein_Array
	MI:0081	Arrays	Peptide_Array
	MI:0695	Arrays	sandwich_immunoassay
	MI:0008	Arrays	Array_technology
	MI:0678	Arrays	Antibody_array
	MI:0047	Western-Blot	Far-Western-Blot
	MI:0705	Western-Blot	Anti_tag_western_blot
	MI:0807	Comigration/SDSpage	Comigration_in_gel_electrophoresis
	MI:0808	Comigration/SDSpage	Comigration_in_SDS-PAGE
	MI:0404	Comigration/SDSpage	Comigration_in_nn_denaturing_gel_elect.
	MI:0276	Comigration/SDSpage	Blue_Native_page
	MI:0413	Comigration/SDSpage	Electrophoresis_Mobility_Shift_Assay
	MI:0821	Comigration/SDSpage	molecular_weight_estimation_by_autoradiography
	MI:0982	Comigration/SDSpage	Electrophoresis_mobility_based_method
	MI:0412	Comigration/SDSpage	Electrophoretic_mobility_supershift_assay
	MI:0034	Display_technology	Display_Technology
	MI:0084	Display_technology	Phage_Display
	MI:0108	Display_technology	T7_Phage_Display
	MI:0900	Display_technology	p8_filamentous_phage_display
	MI:0066	Display_technology	Lambda_Phage_Display
	MI:0048	Display_technology	Filamentous_Phage_Display
	MI:0009	Display_technology	Bacterial_Display
	MI:0115	Display_technology	Yeast_display
	MI:0030	Cross-linking	Cross-linking
	MI:0031	Cross-linking	Protein_CX_with_Bifunctional_Reagent
	MI:0071	Molecular_Sieving	Molecular_Sieving
	MI:0004	Molecular_Sieving	Affinity_Chromatography
	MI:0227	Molecular_Sieving	reverse_phase_chromatography
	MI:0091	Molecular_Sieving	Chromatography_technology
	MI:0226	Molecular_Sieving	ion_exchange_chromatography
	MI:0049	Filter_Binding	Filter_Binding
	MI:0027	Cosedimentation	Cosedimentation
	MI:1022	Cosedimentation	field_flow_fractionation
	MI:0028	Cosedimentation	Cosedimentation_in_solution
	MI:0029	Cosedimentation	Cosedimentation_through_density_gradient
	MI:0411	ELISA	ELISA
	MI:0402	Chromatin_IP	Chromatin_IP_Assay
	MI:0225	Chromatin_IP	chromatin_immunoprecipitation_array
	MI:0729	Luminescence_Based_Mam_Interactome_Mapping	Luminescence_Based_Mam_Interactome_Mapping
	MI:0813	Proximity_Ligation_Assay	Proximity_Ligation_Assay
	MI:1314	Proximity_Ligation_Assay	Proximity-dependent_biotin_identification
	MI:1313	Proximity_Ligation_Assay	BioID
	MI:0905	Proximity_Ligation_Assay	Amplified_luminescent_proximity_homogeneous_assay
	MI:0016	Circular_Dichroism	Circular_Dichroism
	MI:0077	Nuclear_Magnetic_Resonance	Nuclear_Magnetic_Resonance
	MI:1104	Nuclear_Magnetic_Resonance	Solid_state_nmr
	MI:0114	X-ray_cristallography	X-ray_cristallography
	MI:0825	X-ray_cristallography	x-ray_fiber_diffraction
	MI:0826	X-ray_cristallography	X-ray_scattering
	MI:0107	Surface_Plasmon_Resonance	Surface_Plasmon_Resonance
	MI:0969	Surface_Plasmon_Resonance	bio-layer_interferometry
	MI:0921	Surface_Plasmon_Resonance	Surface_plasmon_resonance_array
	MI:0051	Fluorescence_Technology	Fluorescence_Technology
	MI:0809	Fluorescence_Technology	Bimolecular_Fluo._Complementation
	MI:0052	Fluorescence_Technology	Fluorescence_Correlation_Spectroscopy_
	MI:0017	Fluorescence_Technology	Classical_Fluorescence_Spectroscopy
	MI:0055	Fluorescence_Technology	Fluorescence_Resonance_Energy_Transfer
	MI:0420	Fluorescence_Technology	kinase_homogeneous_time_resolved_fluorescence
	MI:0053	Fluorescence_Technology	Fluorescence_Polarization_Spectroscopy_
	MI:0012	Fluorescence_Technology	Bioluminescence_resonance_energy_transfer
	MI:0510	Fluorescence_Technology	Homogeneous_time_resolved_fluorescence
	MI:1016	Fluorescence_Technology	Fluorescence_recovery_after_photobleaching
	MI:0067	Light_Scattering	Light_Scattering
	MI:0104	Light_Scattering	static_light_scattering
	MI:0038	Light_Scattering	Dynamic_Light_Scattering
	MI:0065	Calorimetry	Isothermal_Tritation_Calorimetry
	MI:1235	Calorimetry	thermal_shift_binding
	MI:1247	Calorimetry	microscale_thermophoresis
	MI:0428	Imaging_Technique	Imaging_Technique
	MI:0872	Imaging_Technique	Atomic_Force_Microscopy
	MI:0040	Imaging_Technique	Electron_Microscopy
	MI:0020	Imaging_Technique	Transmission_Electron_Microscopy
	MI:1024	Imaging_Technique	Scanning_electron_microscopy
	MI:0426	Imaging_Technique	Light_Microscopy
	MI:0410	Imaging_Technique	3D_Electron_Microscopy
	MI:0416	Imaging_Technique	Fluorescence_Microscopy
	MI:0663	Imaging_Technique	Confocal_Microscopy
	MI:0018	Two_Hybrid	Two_Hybrid
	MI:0397	Two_Hybrid	Two_Hybrid_Array
	MI:0398	Two_Hybrid	Two_Hybrid_Pooling_Approach
	MI:0399	Two_Hybrid	Two_Hybrid_Fragment_pooling_approach_
	MI:1112	Two_Hybrid	Two_Hybrid_Prey_Pooling_Approach
	MI:1356	Two_Hybrid	Validated_Two_Hybrid
	MI:0399	Two_Hybrid	Two_hybrid_fragment_pooling_approach
	MI:2215	Two_Hybrid	barcode_fusion_genetics_two_hybrid
	MI:1113	Two_Hybrid	two_hybrid_bait_and_prey_pooling_approach
	MI:0432	Two_Hybrid	one_hybrid
	MI:0370	Two_Hybrid	tox-r_dimerization_assay
	MI:0655	Two_Hybrid	lambda_repressor_two_hybrid
	MI:0588	Two_Hybrid	three_hybrid
	MI:0437	Two_Hybrid	Protein_three_hybrid
	MI:0726	Two_Hybrid	Reverse_two_hybrid
	MI:0097	Reconstruction	Reverse_RAS_Recruitment_System
	MI:0231	Reconstruction	Mammalian_P-P_interaction_Trap
	MI:0727	Reconstruction	lexa_b52_complementation
	MI:0090	Reconstruction	Protein_Complementation_Assay
	MI:0112	Reconstruction	Ubiquitin_Reconstruction
	MI:0011	Reconstruction	Beta_Lactamase_Complementation
	MI:0232	Reconstruction	Transcriptional_complementation_assay
	MI:0728	Reconstruction	Gal4_vp16_complementation
	MI:1203	Reconstruction	Split_luciferase_complementation
	MI:0010	Reconstruction	Beta_galactosidase_complementation
	MI:1037	Reconstruction	Split_renilla_luciferase_complementation
	MI:0111	Reconstruction	Dihydrofolate_reductase_reconstruction
	MI:0369	Reconstruction	Lex-a_dimerization_assay
	MI:0254	Genetic_Inference	Genetic_Inference
	MI:0697	Genetic_Inference	dna_directed_dna_polymerase_assay
	MI:0256	Genetic_Inference	Rna_interference
	MI:0440	Ligand_Binding	Saturation_Binding
	MI:0405	Ligand_Binding	Competition_Binding
	MI:0417	Footprinting	Footprinting
	MI:0606	Footprinting	DNase_I_footprinting
	MI:0605	Footprinting	Enzymatic_footprinting
	MI:1192	Genetic_Inference	Antisense_oligonucleotides
	MI:0054	FACS	Fluorescence-activated_cell_sorting
	MI:0099	Scintillation	Scintillation_proximity_assay
	MI:0430	DNA-RNA-Protein_interaction	Nucleic_acid_uv_cross-linking_assay
	MI:0515	Enzyme	Methyltransferase_assay
	MI:1017	DNA-RNA-Protein_interaction	Rna_immunoprecipitation
	MI:1038	Nanowires	silicon_nanowire_field-effect_transistor
	MI:0964	Infrared_spectroscopy	infrared_spectroscopy
	MI:0045	General	experimental_interaction_detection
	MI:0400	General	Affinity_Technology
	MI:0401	General	biochemical
	MI:0686	Unspecified	unspecified
	MI:0035	General	docking
	MI:0013	General	biophysical
	MI:0892	General	solid_phase_assay
	MI:0493	General	in_vivo
	MI:0492	General	in_vitro
	MI:0046	General	experimental_knowledge_based
	MI:MOV34-34KD	Unspecified	gene_name_synonym
	MI:HRIHFB2281	Unspecified	gene_name_synonym
	MI:0968	General	biosensor
	MI:0105	Unspecified	structure_based_prediction
	MI:bK984G1.4	Unspecified	gene_name_synonym
	MI:S2	Unspecified	gene_name_synonym
	MI:0063	Unspecified	interaction_prediction
	MI:0110	Unspecified	text_mining
	MI:0058	Unspecified	genome_based_prediction
	MI:0101	Unspecified	sequence_based_prediction
	Code	Ontology	Group_Name_
	MI:2222	Scoring applied to AP/MS data	Affinity Purification & Mass Spectrometry
	MI:0915	Physical association	Imaging technique
	MI:0403	colocalisation	General
	MI:0314	complex	General
	MI:0113	Western-Blot	Western-Blot
	MI:0025	*	Affinity Purification & Mass Spectrometry
	MI:0028	Cosedimentation in solution	Cosedimentation
	MI:0516	Methyl transferase radiometric assay	Enzyme
	MI:0870	Dimethylase Assay	Enzyme
	MI:2289	Viro-TRAP	Display Technology
	MI:0022	/	Unspecified
	Affinity Capture-MS	/	Affinity Purification & Mass Spectrometry
	Affinity Capture-Western	/	Western-Blot
	Biochemical Activity	/	General
	Reconstituted Complex	/	Reconstruction
	Cofractionation	/	Cosedimentation
	Co-crystal structure	/	X-ray_crystallography
	Co-localisation	/	Imaging Technique
	Protein-peptide	/	Arrays
