# Supplementary material for: Protein network analysis links the NSL complex to Parkinson’s disease via mitochondrial and nuclear biology
Source: Royal Society of Chemistry journal article supplement (doi:10.1039/d2mo00325b), 2023-06-14
Supplement: d2mo00325b6.xlsx [file d2mo00325b6.xlsx]

## Sheet: Supplementary Table 5
Seed:Gene Name	Seed:EntrezID	Interactor:Gene Name	Interactor:EntrezID
LRRK2	120892	AARS1	16
LRRK2	120892	ABCF1	23
MAVS	57506	ABL1	25
TP53	7157	ABL1	25
TERT	7015	ABL1	25
TP53	7157	ABR	29
LRRK2	120892	ACACA	31
PPP2R2B	5521	ACACA	31
LRRK2	120892	ACADSB	36
LRRK2	120892	ACLY	47
PPP2R2B	5521	ACLY	47
LRRK2	120892	ACO1	48
LRRK2	120892	ACTA2	59
TP53	7157	ACTA2	59
TP53	7157	ACTB	60
PPP1CC	5501	ACTB	60
LRRK2	120892	ACTB	60
LRRK2	120892	ACTC1	70
PPP1CC	5501	ACTG1	71
LRRK2	120892	ACTG1	71
LRRK2	120892	ACTG2	72
LRRK2	120892	ACTN4	81
TP53	7157	ACTL6A	86
LRRK2	120892	ACTL6A	86
LRRK2	120892	ACTN1	87
TP53	7157	ADH5	128
LRRK2	120892	PARP1	142
TP53	7157	PARP1	142
LRRK2	120892	ADSS2	159
PPP1CC	5501	AP2A1	160
LRRK2	120892	AP2A2	161
LRRK2	120892	AP1B1	162
LRRK2	120892	AHCY	191
LRRK2	120892	AK2	204
LRRK2	120892	AK4	205
TERT	7015	AKT1	207
LRRK2	120892	AKT1	207
PPP1CC	5501	AKT1	207
LAP3	51056	ALAD	210
LRRK2	120892	ALB	213
LRRK2	120892	ALDH2	217
LRRK2	120892	ALDH1B1	219
LRRK2	120892	ALDH9A1	223
LRRK2	120892	ALDOA	226
LRRK2	120892	AKR1B1	231
LRRK2	120892	ALOX12B	242
MAVS	57506	AMFR	267
TP53	7157	ANG	283
TP53	7157	ANK2	287
LRRK2	120892	SLC25A4	291
LRRK2	120892	SLC25A5	292
TP53	7157	SLC25A5	292
LRRK2	120892	SLC25A6	293
TP53	7157	ANXA1	301
TP53	7157	ANXA2	302
TP53	7157	ANXA3	306
TP53	7157	ANXA7	310
LRRK2	120892	NUDT2	318
LRRK2	120892	APEX1	328
TP53	7157	APEX1	328
MAVS	57506	BIRC2	329
MAVS	57506	BIRC3	330
PPP1CC	5501	BIRC5	332
LRRK2	120892	APOA4	337
MRPL11	65003	APP	351
PPP1CC	5501	APP	351
ECI2	10455	APP	351
LAP3	51056	APP	351
LRRK2	120892	APRT	353
TP53	7157	AR	367
CCAR2	57805	AR	367
LRRK2	120892	ARF3	377
LRRK2	120892	ARF4	378
LRRK2	120892	ARF5	381
LRRK2	120892	ARF6	382
LRRK2	120892	ARG1	383
LRRK2	120892	RHOA	387
TP53	7157	ARL3	403
LRRK2	120892	ASNS	440
TP53	7157	ATF3	467
SNAP29	9342	ATF4	468
TP53	7157	ATM	472
PPP1CC	5501	ATM	472
LRRK2	120892	ATP1A1	476
LRRK2	120892	ATP2A2	488
LRRK2	120892	ATP5F1A	498
TP53	7157	ATP5F1A	498
LRRK2	120892	ALDH7A1	501
PPP1CC	5501	ATP5F1B	506
ECI2	10455	ATP5F1B	506
LRRK2	120892	ATP5F1C	509
LRRK2	120892	ATP5ME	521
LRRK2	120892	ATP6V1A	523
LRRK2	120892	ATP6V1B2	526
LRRK2	120892	ATP5PO	539
TP53	7157	ATR	545
TP53	7157	ATRX	546
LRRK2	120892	ATRX	546
ECI2	10455	AZGP1	563
LRRK2	120892	AZGP1	563
TP53	7157	BACH1	571
TP53	7157	BAG1	573
LRRK2	120892	BAG1	573
TP53	7157	BAK1	578
TP53	7157	BARD1	580
LRRK2	120892	BAX	581
TP53	7157	BAX	581
PPP1CC	5501	CCND1	595
TP53	7157	CCND1	595
TP53	7157	BCL2	596
PPP1CC	5501	BCL2	596
PPP1CC	5501	BCL2L1	598
TP53	7157	BCL2L1	598
TP53	7157	NA	599
TP53	7157	BCL6	604
TP53	7157	BCR	613
TP53	7157	BLM	641
LRRK2	120892	BLMH	642
TP53	7157	BMI1	648
MRPS15	64960	BMP4	652
PPP1CC	5501	BMPR2	659
TP53	7157	BMX	660
AGMAT	79814	BNIP1	662
CCAR2	57805	BRCA1	672
TP53	7157	BRCA1	672
PPP1CC	5501	BRCA1	672
TP53	7157	BRCA2	675
TP53	7157	KLF5	688
TP53	7157	BTK	695
LRRK2	120892	BYSL	705
LRRK2	120892	NA	706
MAVS	57506	C1QBP	708
LRRK2	120892	C1QBP	708
PPP1CC	5501	C1QA	712
SNAP29	9342	VPS51	738
TP53	7157	PTTG1IP	754
LRRK2	120892	CA2	760
TP53	7157	CA11	770
LRRK2	120892	CAD	790
TP53	7157	CAD	790
TP53	7157	CALD1	800
LRRK2	120892	CALM1	801
PPP2R2B	5521	CALM2	805
LRRK2	120892	CALM2	805
LRRK2	120892	CALM3	808
PPP1CC	5501	CALML3	810
MRPL11	65003	CAMK2B	816
MRPL11	65003	CAMK2D	817
LRRK2	120892	CANX	821
SNAP29	9342	CANX	821
TP53	7157	CAPG	822
LRRK2	120892	CAPN1	823
TP53	7157	CAPN1	823
PPP2R2B	5521	CAPZA1	829
LRRK2	120892	CAPZA1	829
LRRK2	120892	CAPZA2	830
PPP2R2B	5521	CAPZB	832
TP53	7157	CAPZB	832
LRRK2	120892	CAPZB	832
PPP1CC	5501	CAPZB	832
TP53	7157	CASP3	836
LRRK2	120892	CASP3	836
TP53	7157	CASP8	841
LRRK2	120892	CASP8	841
LRRK2	120892	CAT	847
ECI2	10455	CAT	847
TP53	7157	RUNX2	860
TP53	7157	RUNX3	864
LRRK2	120892	CBFB	865
LRRK2	120892	CBLB	868
AGMAT	79814	SERPINH1	871
LRRK2	120892	SERPINH1	871
TP53	7157	SERPINH1	871
LRRK2	120892	CBR1	873
TP53	7157	CCNA2	890
LRRK2	120892	CCNA2	890
PPP1CC	5501	CCNB1	891
PPP1CC	5501	CCND3	896
TP53	7157	CCNG1	900
TP53	7157	CCNH	902
PPP2R2B	5521	CCT6A	908
TP53	7157	CCT6A	908
PPP1CC	5501	CD247	919
SNAP29	9342	CD7	924
TP53	7157	CD40LG	959
TP53	7157	CD44	960
TP53	7157	CDK1	983
PPP1CC	5501	CDK1	983
LRRK2	120892	CDK11B	984
LRRK2	120892	LRBA	987
TRAK1	22906	CDC5L	988
TP53	7157	CDC25C	995
LRRK2	120892	CDC27	996
CCAR2	57805	CDC34	997
PPP1CC	5501	CDC34	997
TP53	7157	CDC42	998
LRRK2	120892	CDC42	998
MAVS	57506	CDH1	999
TP53	7157	CDK2	1017
LRRK2	120892	CDK2	1017
PPP1CC	5501	CDK2	1017
LRRK2	120892	CDK4	1019
PPP1CC	5501	CDK4	1019
TP53	7157	CDK4	1019
LRRK2	120892	CDK5	1020
TP53	7157	CDK5	1020
TRAK1	22906	CDK6	1021
LRRK2	120892	CDK6	1021
CCAR2	57805	CDK7	1022
TP53	7157	CDK7	1022
TP53	7157	CDK8	1024
TP53	7157	CDK9	1025
CCAR2	57805	CDK9	1025
TP53	7157	CDKN1A	1026
TP53	7157	CDKN1C	1028
TP53	7157	NA	1029
PPP1CC	5501	NA	1029
TP53	7157	CDKN2C	1031
TP53	7157	CEBPB	1051
TP53	7157	CENPA	1058
LRRK2	120892	CENPF	1063
LRRK2	120892	CETN3	1070
ECI2	10455	CFTR	1080
PPP2R2B	5521	CFTR	1080
CCAR2	57805	CFTR	1080
MRPL11	65003	CFTR	1080
TP53	7157	CFTR	1080
TP53	7157	RCC1	1104
LRRK2	120892	CHD1	1105
PPP1CC	5501	CHD3	1107
CCAR2	57805	CHD3	1107
TP53	7157	CHD3	1107
PPP1CC	5501	CHD4	1108
CCAR2	57805	CHD4	1108
TP53	7157	CHEK1	1111
LRRK2	120892	CHGB	1114
PPP1CC	5501	CHRNA7	1139
TP53	7157	CHUK	1147
MAVS	57506	CHUK	1147
PPP1CC	5501	CKB	1152
LRRK2	120892	TBCB	1155
TP53	7157	ERCC8	1161
LRRK2	120892	AP2M1	1173
LRRK2	120892	CLU	1191
PPP1CC	5501	CLIC1	1192
LRRK2	120892	CLIC1	1192
TP53	7157	CLK3	1198
TERT	7015	TPP1	1200
TP53	7157	CLTA	1211
TP53	7157	CLTB	1212
LRRK2	120892	CLTC	1213
TP53	7157	CLTC	1213
PPP1CC	5501	CLTC	1213
TP53	7157	PLK3	1263
LRRK2	120892	CNN3	1266
LRRK2	120892	CNP	1267
LRRK2	120892	COPA	1314
LRRK2	120892	COPB1	1315
TP53	7157	KLF6	1316
SNAP29	9342	COX6B1	1340
PPP1CC	5501	CPM	1368
LRRK2	120892	CPOX	1371
FOXRED1	55572	CPS1	1373
TP53	7157	CR2	1380
LRRK2	120892	CRABP2	1382
TP53	7157	CREB1	1385
CCAR2	57805	CREBBP	1387
TP53	7157	CREBBP	1387
LRRK2	120892	CRKL	1399
TP53	7157	CRYAB	1410
LRRK2	120892	CS	1431
TP53	7157	MAPK14	1432
TP53	7157	CSE1L	1434
LRRK2	120892	CSE1L	1434
LRRK2	120892	CSNK1A1	1452
TP53	7157	CSNK1A1	1452
LRRK2	120892	CSNK1D	1453
TP53	7157	CSNK1D	1453
TP53	7157	CSNK1E	1454
MAVS	57506	CSNK1E	1454
PPP1CC	5501	CSNK1E	1454
LRRK2	120892	CSNK1G2	1455
LRRK2	120892	CSNK1G3	1456
TP53	7157	CSNK2A1	1457
TP53	7157	CSNK2A2	1459
LRRK2	120892	CSNK2A2	1459
PPP1CC	5501	CSNK2B	1460
TP53	7157	CSNK2B	1460
LRRK2	120892	CSTF1	1477
LRRK2	120892	CSTF3	1479
TP53	7157	CTBP1	1487
LRRK2	120892	CTBP1	1487
LRRK2	120892	CTBP2	1488
LRRK2	120892	CTNNA1	1495
LRRK2	120892	CTNND1	1500
LRRK2	120892	CTPS1	1503
LRRK2	120892	CYC1	1537
TP53	7157	CYLD	1540
MAVS	57506	CYLD	1540
CCAR2	57805	CYLD	1540
MRPL11	65003	CYLD	1540
TP53	7157	DACH1	1602
LRRK2	120892	DAD1	1603
TP53	7157	DAPK1	1612
LRRK2	120892	DAPK1	1612
TP53	7157	DAPK3	1613
TP53	7157	DAXX	1616
TERT	7015	DAXX	1616
TP53	7157	BRINP1	1620
PPP2R2B	5521	DBN1	1627
PPP1CC	5501	DBN1	1627
TP53	7157	DBN1	1627
LRRK2	120892	DBN1	1627
LRRK2	120892	ECI1	1632
LRRK2	120892	DCTN1	1639
TP53	7157	DDB1	1642
TERT	7015	DDB1	1642
LRRK2	120892	DDB1	1642
TP53	7157	GADD45A	1647
LRRK2	120892	DDX1	1653
PPP2R2B	5521	DDX3X	1654
MAVS	57506	DDX3X	1654
PPP1CC	5501	DDX3X	1654
TP53	7157	DDX3X	1654
LRRK2	120892	DDX5	1655
TP53	7157	DDX5	1655
LRRK2	120892	DDX6	1656
LRRK2	120892	DHX9	1660
LRRK2	120892	DFFA	1676
TP53	7157	DHCR24	1718
LRRK2	120892	DHCR24	1718
TP53	7157	DHFR	1719
LRRK2	120892	CYB5R3	1727
TP53	7157	NQO1	1728
TERT	7015	DKC1	1736
LRRK2	120892	DKC1	1736
MRPL11	65003	DLD	1738
LRRK2	120892	DLD	1738
TP53	7157	DLST	1743
LRRK2	120892	DLST	1743
LRRK2	120892	DNM1	1759
LRRK2	120892	DYNC1H1	1778
LRRK2	120892	DNM2	1785
TP53	7157	DNMT1	1786
TP53	7157	DPH1	1801
PPP1CC	5501	DPYSL2	1808
LRRK2	120892	DRG2	1819
TP53	7157	ARID3A	1820
LRRK2	120892	DSC1	1823
LRRK2	120892	DSG1	1828
TP53	7157	TSC22D3	1831
LRRK2	120892	DSP	1832
PPP2R2B	5521	DSP	1832
CCAR2	57805	DUSP1	1843
CCAR2	57805	DUSP4	1846
LRRK2	120892	DVL1	1855
LRRK2	120892	DVL2	1856
TP53	7157	DVL2	1856
LRRK2	120892	DVL3	1857
TP53	7157	E2F1	1869
LRRK2	120892	E2F4	1874
TP53	7157	E4F1	1877
ECI2	10455	ECH1	1891
LRRK2	120892	ECHS1	1892
TP53	7157	ECT2	1894
PPP1CC	5501	PHC1	1911
CCAR2	57805	EEF1A1	1915
TP53	7157	EEF1A1	1915
LRRK2	120892	EEF1A1	1915
LRRK2	120892	EEF1A2	1917
LRRK2	120892	EEF1G	1937
TP53	7157	EEF2	1938
LRRK2	120892	EEF2	1938
TP53	7157	EGFR	1956
CCAR2	57805	EGFR	1956
TP53	7157	EGR1	1958
PPP1CC	5501	EIF2S1	1965
LRRK2	120892	EIF2S1	1965
LRRK2	120892	EIF2B1	1967
CCAR2	57805	EIF2S3	1968
LRRK2	120892	EIF2S3	1968
LRRK2	120892	EIF4A2	1974
LRRK2	120892	EIF4EBP1	1978
LRRK2	120892	EIF5	1983
PPP1CC	5501	ELAVL1	1994
AGMAT	79814	ELAVL1	1994
TP53	7157	ELAVL1	1994
LRRK2	120892	ELAVL1	1994
LRRK2	120892	EMD	2010
LRRK2	120892	MARK2	2011
LRRK2	120892	CTTN	2017
LRRK2	120892	ENO1	2023
PPP1CC	5501	ENO2	2026
TP53	7157	EP300	2033
LRRK2	120892	EPB41	2035
PPP1CC	5501	EPB41L1	2036
LRRK2	120892	EPB41L2	2037
TP53	7157	EPHA3	2042
LRRK2	120892	EPRS1	2058
TP53	7157	ERBB4	2066
TP53	7157	ERCC2	2068
TP53	7157	ERCC3	2071
TP53	7157	ERCC6	2074
TP53	7157	ERH	2079
TP53	7157	ERN1	2081
LRRK2	120892	FBL	2091
TP53	7157	FBL	2091
PPP1CC	5501	ESR1	2099
MRPS15	64960	ESR1	2099
TP53	7157	ESR1	2099
MAVS	57506	ESR2	2100
FOXRED1	55572	ESR2	2100
MRPS15	64960	ESR2	2100
LAP3	51056	ESR2	2100
PPP1CC	5501	ESR2	2100
MRPL11	65003	ESR2	2100
LRRK2	120892	ESRRG	2104
LRRK2	120892	ETF1	2107
LRRK2	120892	ETFA	2108
LRRK2	120892	ETFB	2109
TP53	7157	ETS1	2113
TP53	7157	ETS2	2114
LRRK2	120892	EWSR1	2130
TP53	7157	EWSR1	2130
LRRK2	120892	EYA3	2140
LRRK2	120892	FABP5	2171
LRRK2	120892	ACSL3	2181
MRPS15	64960	ACSL4	2182
LRRK2	120892	ACSL4	2182
TP53	7157	ACSL4	2182
LRRK2	120892	FASN	2194
TP53	7157	NA	2197
LRRK2	120892	FDPS	2224
CCAR2	57805	FGF11	2256
LRRK2	120892	FH	2271
TP53	7157	FKBP3	2287
LRRK2	120892	FKBP4	2288
TP53	7157	FOXG1	2290
TP53	7157	FOXC1	2296
TP53	7157	FOXS1	2307
TP53	7157	FOXO3	2309
TERT	7015	FOXO3	2309
LRRK2	120892	FLG	2312
LRRK2	120892	FLII	2314
PPP1CC	5501	FLII	2314
PPP1CC	5501	FLNA	2316
LRRK2	120892	FLNA	2316
TP53	7157	FLNA	2316
LRRK2	120892	FLNB	2317
LRRK2	120892	FLNC	2318
MAVS	57506	FLOT2	2319
LRRK2	120892	FMR1	2332
CCAR2	57805	FN1	2335
TP53	7157	MTOR	2475
LRRK2	120892	MTOR	2475
TERT	7015	MTOR	2475
LRRK2	120892	FRG1	2483
TP53	7157	FTH1	2495
PPP1CC	5501	FTL	2512
CCAR2	57805	FYN	2534
TERT	7015	XRCC6	2547
TP53	7157	XRCC6	2547
LRRK2	120892	GAK	2580
ECI2	10455	GALC	2581
LRRK2	120892	GALK1	2584
TP53	7157	GAPDH	2597
LRRK2	120892	GAPDH	2597
LRRK2	120892	GARS1	2617
LRRK2	120892	NIPSNAP2	2631
PPP1CC	5501	GBP1	2633
TP53	7157	KAT2A	2648
LAP3	51056	GCNT1	2650
LRRK2	120892	GDI1	2664
TP53	7157	GFI1	2672
LRRK2	120892	GFPT1	2673
LRRK2	120892	GCLM	2730
TP53	7157	GLI1	2735
LRRK2	120892	GNA12	2768
LRRK2	120892	GNAI2	2771
LRRK2	120892	GNAI3	2773
PPP1CC	5501	GNB1	2782
TP53	7157	GNB2	2783
LRRK2	120892	GNB2	2783
LRRK2	120892	GOLGA2	2801
LRRK2	120892	GOLGB1	2804
TP53	7157	SFN	2810
LRRK2	120892	SFN	2810
TP53	7157	GPS1	2873
TP53	7157	GPS2	2874
PPP1CC	5501	GRB2	2885
LRRK2	120892	GRN	2896
TP53	7157	NR3C1	2908
LRRK2	120892	PDIA3	2923
MRPS15	64960	GRSF1	2926
MRPL11	65003	GRSF1	2926
PPP1CC	5501	GSK3A	2931
TRAK1	22906	GSK3B	2932
LRRK2	120892	GSK3B	2932
TP53	7157	GSK3B	2932
PPP1CC	5501	GSK3B	2932
TP53	7157	GSN	2934
LRRK2	120892	GSTM3	2947
TP53	7157	GSTM4	2948
PPP1CC	5501	GSTM5	2949
TP53	7157	MSH6	2956
LRRK2	120892	MSH6	2956
LRRK2	120892	GTF2B	2959
TP53	7157	GTF2H1	2965
TP53	7157	GTF2I	2969
LRRK2	120892	GTF2I	2969
TP53	7157	BRF1	2972
TP53	7157	GUCY1A1	2982
PPP1CC	5501	GYS1	2997
TP53	7157	GYS2	2998
ECI2	10455	H1-2	3006
LRRK2	120892	H1-3	3007
PPP2R2B	5521	H1-4	3008
TP53	7157	H2AX	3014
LRRK2	120892	NA	3020
MRPS15	64960	H1-1	3024
ECI2	10455	H1-1	3024
CCAR2	57805	HSD17B10	3028
TP53	7157	HADHB	3032
LRRK2	120892	HADHB	3032
LRRK2	120892	HAL	3034
LRRK2	120892	HARS1	3035
TP53	7157	HBB	3043
PPP1CC	5501	HCFC1	3054
FOXRED1	55572	HCFC1	3054
PPP2R2B	5521	HCFC1	3054
TP53	7157	HTT	3064
LRRK2	120892	HTT	3064
PPP1CC	5501	HDAC1	3065
TRAK1	22906	HDAC1	3065
TP53	7157	HDAC1	3065
LRRK2	120892	HDAC2	3066
TP53	7157	HDAC2	3066
LRRK2	120892	HELLS	3070
LRRK2	120892	HIC1	3090
CCAR2	57805	HIF1A	3091
LRRK2	120892	HIF1A	3091
TP53	7157	HIF1A	3091
TP53	7157	UBE2K	3093
LRRK2	120892	UBE2K	3093
LRRK2	120892	HINT1	3094
LRRK2	120892	HK1	3098
LRRK2	120892	HK2	3099
TP53	7157	HMGB1	3146
TP53	7157	HMGB2	3148
PPP1CC	5501	HMGN1	3150
LRRK2	120892	HMGCS1	3157
TP53	7157	HMGA1	3159
LRRK2	120892	HMMR	3161
TP53	7157	NR4A1	3164
PPP1CC	5501	FOXA1	3169
TP53	7157	FOXA3	3171
TP53	7157	HNF4A	3172
MRPS15	64960	HNRNPA1	3178
MRPL11	65003	HNRNPA1	3178
TP53	7157	HNRNPA1	3178
CCAR2	57805	HNRNPA1	3178
LRRK2	120892	HNRNPA2B1	3181
PPP1CC	5501	HNRNPA2B1	3181
TP53	7157	HNRNPA2B1	3181
LRRK2	120892	HNRNPD	3184
TP53	7157	HNRNPF	3185
TP53	7157	HNRNPH1	3187
LRRK2	120892	HNRNPH2	3188
PPP1CC	5501	HNRNPH3	3189
PPP2R2B	5521	HNRNPK	3190
TP53	7157	HNRNPK	3190
SNAP29	9342	HNRNPL	3191
TP53	7157	HNRNPL	3191
LRRK2	120892	HNRNPL	3191
PPP2R2B	5521	HNRNPU	3192
LRRK2	120892	HNRNPU	3192
TP53	7157	HNRNPU	3192
MRPS15	64960	HNRNPU	3192
PPP1CC	5501	TLX1	3195
TP53	7157	HPCA	3208
LRRK2	120892	HPRT1	3251
LRRK2	120892	HPX	3263
TP53	7157	HRAS	3265
LAP3	51056	AGFG1	3267
LRRK2	120892	PRMT1	3276
TP53	7157	PRMT1	3276
PPP1CC	5501	HSD17B3	3293
ECI2	10455	HSF2	3298
TP53	7157	DNAJA1	3301
LRRK2	120892	DNAJA1	3301
TERT	7015	HSPA1A	3303
LRRK2	120892	HSPA1A	3303
TP53	7157	HSPA1A	3303
TP53	7157	HSPA1B	3304
PPP2R2B	5521	HSPA1B	3304
CCAR2	57805	HSPA1L	3305
TP53	7157	HSPA1L	3305
TP53	7157	HSPA2	3306
PPP1CC	5501	HSPA2	3306
FOXRED1	55572	HSPA2	3306
TERT	7015	HSPA4	3308
TP53	7157	HSPA4	3308
LRRK2	120892	HSPA4	3308
PPP1CC	5501	HSPA4	3308
TP53	7157	HSPA5	3309
PPP2R2B	5521	HSPA5	3309
PPP1CC	5501	HSPA5	3309
TP53	7157	HSPA6	3310
TP53	7157	HSPA8	3312
PPP2R2B	5521	HSPA8	3312
FOXRED1	55572	HSPA8	3312
MAVS	57506	HSPA8	3312
PPP1CC	5501	HSPA8	3312
LRRK2	120892	HSPA8	3312
CCAR2	57805	HSPA8	3312
PPP2R2B	5521	HSPA9	3313
TP53	7157	HSPA9	3313
MAVS	57506	HSPA9	3313
LRRK2	120892	HSPA9	3313
LRRK2	120892	HSPB1	3315
TP53	7157	HSPB1	3315
TP53	7157	HSP90AA1	3320
TERT	7015	HSP90AA1	3320
LRRK2	120892	HSP90AA1	3320
TP53	7157	HSP90AB1	3326
LRRK2	120892	HSP90AB1	3326
TP53	7157	HSPD1	3329
LRRK2	120892	HSPD1	3329
FOXRED1	55572	HSPD1	3329
MRPS15	64960	HSPD1	3329
CCAR2	57805	HSPD1	3329
ECI2	10455	HSPD1	3329
LRRK2	120892	DNAJB1	3337
TP53	7157	DNAJB1	3337
MRPS15	64960	MRPL58	3396
LRRK2	120892	MRPL58	3396
MRPL11	65003	MRPL58	3396
LRRK2	120892	IDE	3416
ECI2	10455	IDE	3416
LRRK2	120892	IDH2	3418
LRRK2	120892	IDH3A	3419
TP53	7157	IDH3B	3420
LRRK2	120892	IDH3G	3421
LRRK2	120892	IDI1	3422
TP53	7157	IFI16	3428
MAVS	57506	IFIT3	3437
TP53	7157	IGF1R	3480
SNAP29	9342	IGF1R	3480
TP53	7157	RBPJ	3516
CCAR2	57805	IKBKB	3551
MAVS	57506	IKBKB	3551
TP53	7157	IKBKB	3551
PPP1CC	5501	IL3RA	3563
TP53	7157	FOXK2	3607
PPP1CC	5501	ILF3	3609
MRPL11	65003	ILF3	3609
LRRK2	120892	IMPDH2	3615
TP53	7157	ING1	3621
TP53	7157	ING2	3622
MAVS	57506	IRF3	3661
MAVS	57506	IRF5	3663
TP53	7157	IRF7	3665
MAVS	57506	IRF7	3665
CCAR2	57805	ITGA4	3676
AGMAT	79814	ITGAV	3685
LRRK2	120892	STT3A	3703
LRRK2	120892	ITPA	3704
TP53	7157	ITPK1	3705
SNAP29	9342	ITPR3	3710
DUS2	54920	JUN	3725
LAP3	51056	JUN	3725
MRPS15	64960	JUN	3725
PPP1CC	5501	JUN	3725
CCAR2	57805	JUN	3725
TP53	7157	JUN	3725
PPP2R2B	5521	JUN	3725
FOXRED1	55572	JUN	3725
PPP2R2B	5521	JUP	3728
LRRK2	120892	KARS1	3735
LRRK2	120892	KIF2A	3796
TRAK1	22906	KIF5A	3798
TRAK1	22906	KIF5B	3799
PPP1CC	5501	KPNB1	3837
LRRK2	120892	KPNB1	3837
TP53	7157	KPNB1	3837
TP53	7157	KPNA2	3838
PPP1CC	5501	KPNA2	3838
TP53	7157	KPNA4	3840
LRRK2	120892	KPNA4	3840
LRRK2	120892	TNPO1	3842
PPP2R2B	5521	KRT1	3848
PPP2R2B	5521	KRT2	3849
LRRK2	120892	KRT2	3849
ECI2	10455	KRT4	3851
PPP2R2B	5521	KRT5	3852
LRRK2	120892	KRT5	3852
ECI2	10455	KRT6B	3854
PPP2R2B	5521	KRT6B	3854
LRRK2	120892	KRT6B	3854
LRRK2	120892	KRT8	3856
LRRK2	120892	KRT9	3857
PPP2R2B	5521	KRT9	3857
LRRK2	120892	KRT10	3858
PPP2R2B	5521	KRT10	3858
LRRK2	120892	KRT14	3861
PPP2R2B	5521	KRT14	3861
LRRK2	120892	KRT16	3868
PPP2R2B	5521	KRT16	3868
LRRK2	120892	KRT17	3872
LRRK2	120892	KTN1	3895
TP53	7157	LAMA4	3910
SNAP29	9342	LAMP1	3916
LRRK2	120892	LAMP2	3920
LRRK2	120892	RPSA	3921
PPP1CC	5501	LBR	3930
LRRK2	120892	LDHA	3939
LRRK2	120892	LDHB	3945
LRRK2	120892	LETM1	3954
LRRK2	120892	LGALS8	3964
LRRK2	120892	LIG3	3980
LAP3	51056	LIG4	3981
LRRK2	120892	ABLIM1	3983
LRRK2	120892	LMNA	4000
TP53	7157	LMNA	4000
PPP1CC	5501	LMNA	4000
LRRK2	120892	LMNB1	4001
LRRK2	120892	LRP6	4040
TP53	7157	LYN	4067
LRRK2	120892	LYZ	4069
TP53	7157	LYZ	4069
LRRK2	120892	CAPRIN1	4076
LRRK2	120892	MAD2L1	4085
TP53	7157	SMAD1	4086
TP53	7157	SMAD2	4087
TP53	7157	SMAD3	4088
TP53	7157	SMAD7	4092
TP53	7157	NA	4101
CCAR2	57805	MAGEA6	4105
TP53	7157	MAP1B	4131
LRRK2	120892	MAP1B	4131
LRRK2	120892	MAPT	4137
LRRK2	120892	MAT2A	4144
LRRK2	120892	MATK	4145
PPP1CC	5501	MAX	4149
LRRK2	120892	MAZ	4150
LRRK2	120892	MBP	4155
CCAR2	57805	MCC	4163
TP53	7157	MCL1	4170
LRRK2	120892	MCM2	4171
PPP2R2B	5521	MCM2	4171
LRRK2	120892	MCM6	4175
TP53	7157	MDH1	4190
LRRK2	120892	MDH1	4190
CCAR2	57805	MDM2	4193
TERT	7015	MDM2	4193
TP53	7157	MDM2	4193
TP53	7157	MDM4	4194
PPP1CC	5501	MDM4	4194
LRRK2	120892	ME2	4200
ECI2	10455	MEA1	4201
TP53	7157	MAP3K1	4214
PPP1CC	5501	MAP3K3	4215
CCAR2	57805	MAP3K3	4215
LRRK2	120892	RAB8A	4218
TP53	7157	MEN1	4221
TP53	7157	MFAP4	4239
LRRK2	120892	MGST1	4257
ECI2	10455	MGST3	4259
MRPL11	65003	MGST3	4259
MAVS	57506	MGST3	4259
TP53	7157	MIF	4282
LRRK2	120892	MIF	4282
LAP3	51056	MIF	4282
LRRK2	120892	MIPEP	4285
TP53	7157	ATXN3	4287
LRRK2	120892	MKI67	4288
PPP1CC	5501	MKI67	4288
PPP2R2B	5521	MLH1	4292
TP53	7157	KMT2A	4297
LRRK2	120892	MLLT3	4300
TP53	7157	MNAT1	4331
TP53	7157	MOV10	4343
MRPL11	65003	MOV10	4343
LRRK2	120892	MOV10	4343
FOXRED1	55572	MOV10	4343
MRPS15	64960	MPP1	4354
MRPL11	65003	MPV17	4358
LRRK2	120892	MYO1B	4430
PPP1CC	5501	MYO1B	4430
TP53	7157	CITED1	4435
TP53	7157	MSH2	4436
LRRK2	120892	MSH2	4436
LRRK2	120892	MSI1	4440
LRRK2	120892	MSN	4478
TP53	7157	MSX1	4487
TP53	7157	MT1A	4489
FOXRED1	55572	MTIF2	4528
LRRK2	120892	MYO1F	4542
TP53	7157	MUC1	4582
PPP1CC	5501	MYC	4609
TRAK1	22906	MYC	4609
TP53	7157	MYC	4609
CCAR2	57805	MYC	4609
LRRK2	120892	MYH2	4620
TP53	7157	MYH9	4627
PPP1CC	5501	MYH9	4627
LRRK2	120892	MYH9	4627
LRRK2	120892	MYH10	4628
PPP2R2B	5521	MYL6	4637
LRRK2	120892	MYL6	4637
TP53	7157	MYLK	4638
TP53	7157	MYO1C	4641
LRRK2	120892	MYO1C	4641
LRRK2	120892	MYO1D	4642
TP53	7157	MYO6	4646
PPP2R2B	5521	MYO9A	4649
PPP1CC	5501	PPP1R12A	4659
TP53	7157	PPP1R12A	4659
LRRK2	120892	PPP1R12A	4659
TP53	7157	HNRNPM	4670
TP53	7157	NAP1L1	4673
LRRK2	120892	NAP1L4	4676
LRRK2	120892	NARS1	4677
LRRK2	120892	NASP	4678
LRRK2	120892	NCBP1	4686
TP53	7157	NCL	4691
TERT	7015	NCL	4691
LRRK2	120892	NCL	4691
TP53	7157	NDN	4692
ECI2	10455	NDUFA2	4695
SNAP29	9342	NDUFA4	4697
FOXRED1	55572	NDUFA4	4697
LRRK2	120892	NDUFA4	4697
LRRK2	120892	NDUFA6	4700
ECI2	10455	NDUFA7	4701
LRRK2	120892	NDUFA9	4704
MRPL11	65003	NDUFAB1	4706
LRRK2	120892	NDUFS1	4719
LRRK2	120892	NDUFS2	4720
ECI2	10455	NDUFS3	4722
LRRK2	120892	NDUFS3	4722
LRRK2	120892	NDUFV1	4723
FOXRED1	55572	NDUFS5	4725
LAP3	51056	NDUFS5	4725
LRRK2	120892	NDUFS8	4728
LRRK2	120892	DRG1	4733
LRRK2	120892	SEPTIN2	4735
TP53	7157	RPL10A	4736
LRRK2	120892	RPL10A	4736
PPP1CC	5501	RPL10A	4736
TP53	7157	NEDD8	4738
LRRK2	120892	NEFL	4747
PPP1CC	5501	NEFL	4747
LRRK2	120892	NEK1	4750
PPP1CC	5501	NEK2	4751
TP53	7157	NFATC1	4772
LRRK2	120892	NFATC2	4773
CCAR2	57805	NFKB2	4791
TP53	7157	NFKBIA	4792
MAVS	57506	NFKBIA	4792
TP53	7157	NFYA	4800
TP53	7157	NFYB	4801
TP53	7157	NGFR	4804
LRRK2	120892	NME1	4830
TP53	7157	NME4	4833
TP53	7157	NQO2	4835
TP53	7157	NMT1	4836
LRRK2	120892	NMT1	4836
AGMAT	79814	NONO	4841
PPP1CC	5501	NONO	4841
TP53	7157	NOTCH4	4855
TP53	7157	PNP	4860
PPP1CC	5501	NPM1	4869
MRPL11	65003	NPM1	4869
LRRK2	120892	NPM1	4869
TP53	7157	NPM1	4869
LRRK2	120892	NRDC	4898
TP53	7157	YBX1	4904
LRRK2	120892	YBX1	4904
SNAP29	9342	NSF	4905
LRRK2	120892	NSF	4905
LAP3	51056	NTRK1	4914
CCAR2	57805	NTRK1	4914
LRRK2	120892	NUMA1	4926
LRRK2	120892	NUP88	4927
LRRK2	120892	NUP98	4928
MAVS	57506	OAS3	4940
LRRK2	120892	OAT	4942
LRRK2	120892	OCRL	4952
LRRK2	120892	OPA1	4976
MRPS15	64960	ORC1	4998
MRPL11	65003	ORC1	4998
ECI2	10455	SLC22A18	5002
LRRK2	120892	OSBP	5007
PPP1CC	5501	P2RY6	5031
MRPS15	64960	P2RY6	5031
LRRK2	120892	PAFAH1B1	5048
TP53	7157	PAFAH1B3	5050
LRRK2	120892	PRDX1	5052
LAP3	51056	PRDX1	5052
PPP2R2B	5521	PRDX1	5052
TP53	7157	PRKN	5071
MAVS	57506	PRKN	5071
LRRK2	120892	PRKN	5071
MRPS15	64960	PRKN	5071
LRRK2	120892	PDCL	5082
PPP2R2B	5521	PC	5091
PPP1CC	5501	PCBP1	5093
TP53	7157	PCBP1	5093
LRRK2	120892	PCBP2	5094
MAVS	57506	PCBP2	5094
LRRK2	120892	PCK2	5106
TP53	7157	PCMT1	5110
LRRK2	120892	PCNA	5111
TP53	7157	PCNA	5111
LAP3	51056	PCNA	5111
PPP1CC	5501	PCNA	5111
PPP1CC	5501	PDE6B	5158
ECI2	10455	PDHA1	5160
TP53	7157	PDHA1	5160
LRRK2	120892	PDHA1	5160
LRRK2	120892	PDHB	5162
ECI2	10455	PDK1	5163
PPP2R2B	5521	PDPK1	5170
ECI2	10455	PDZK1	5174
PPP1CC	5501	PFDN2	5202
LRRK2	120892	PFKL	5211
LRRK2	120892	PFKM	5213
LRRK2	120892	PFKP	5214
LRRK2	120892	PFN1	5216
LRRK2	120892	PGD	5226
LRRK2	120892	PGK1	5230
LRRK2	120892	PGM1	5236
LRRK2	120892	PHB	5245
TP53	7157	PHB	5245
TP53	7157	PHF1	5252
TP53	7157	PHKA2	5256
TP53	7157	PHKB	5257
TP53	7157	PHKG2	5261
TP53	7157	SERPINB9	5272
LRRK2	120892	PIK3R1	5295
TP53	7157	PIN1	5300
LRRK2	120892	PKD1	5310
LRRK2	120892	PKM	5315
LRRK2	120892	PKP1	5317
TP53	7157	PLAGL1	5325
CCAR2	57805	PLEC	5339
LRRK2	120892	PLEC	5339
TP53	7157	PLK1	5347
LRRK2	120892	PLK1	5347
MAVS	57506	PLK1	5347
LRRK2	120892	PLOD1	5351
LRRK2	120892	PLS1	5357
LRRK2	120892	PLS3	5358
LRRK2	120892	PML	5371
TERT	7015	PML	5371
TP53	7157	PML	5371
LRRK2	120892	EXOSC10	5394
TP53	7157	POLA1	5422
LRRK2	120892	POLD1	5424
LRRK2	120892	POLE	5426
TP53	7157	POLR2A	5430
LRRK2	120892	POLR2B	5431
PPP1CC	5501	POLR2E	5434
LRRK2	120892	POLR2H	5437
LRRK2	120892	POLR2L	5441
TP53	7157	POLRMT	5442
LRRK2	120892	POLRMT	5442
MRPS15	64960	POU5F1	5460
LRRK2	120892	POU5F1	5460
CCAR2	57805	POU5F1	5460
TP53	7157	PPA1	5464
LRRK2	120892	PPA1	5464
TP53	7157	PPARG	5468
TP53	7157	MED1	5469
LRRK2	120892	PPAT	5471
CCAR2	57805	PPEF1	5475
MAVS	57506	PPIA	5478
LRRK2	120892	PPIB	5479
TP53	7157	PPIB	5479
LRRK2	120892	PPP1CA	5499
TP53	7157	PPP1CA	5499
PPP1CC	5501	PPP1CA	5499
PPP1CC	5501	PPP1CB	5500
TP53	7157	PPP1CC	5501
PPP1CC	5501	PPP1R2	5504
PPP1CC	5501	PPP1R3C	5507
PPP1CC	5501	PPP1R3D	5509
PPP1CC	5501	PPP1R7	5510
PPP1CC	5501	PPP1R8	5511
LRRK2	120892	PPP1R8	5511
PPP1CC	5501	PPP1R10	5514
PPP2R2B	5521	PPP2CA	5515
TP53	7157	PPP2CA	5515
PPP2R2B	5521	PPP2CB	5516
PPP2R2B	5521	PPP2R1A	5518
CCAR2	57805	PPP2R1A	5518
TP53	7157	PPP2R1A	5518
LRRK2	120892	PPP2R1A	5518
PPP2R2B	5521	PPP2R1B	5519
TP53	7157	PPP2R2A	5520
PPP2R2B	5521	PPP2R2A	5520
CCAR2	57805	PPP2R2A	5520
LRRK2	120892	PPP2R2A	5520
CCAR2	57805	PPP2R2B	5521
TP53	7157	PPP2R2B	5521
PPP2R2B	5521	PPP2R2C	5522
PPP1CC	5501	PPP2R5C	5527
TP53	7157	PPP2R5C	5527
TP53	7157	PPP3CA	5530
TP53	7157	PPP4C	5531
PPP2R2B	5521	PPP4C	5531
TP53	7157	PPP3R1	5534
MAVS	57506	PPP6C	5537
LRRK2	120892	PPP6C	5537
CCAR2	57805	PPT1	5538
TP53	7157	PRIM1	5557
TP53	7157	PRKAB2	5565
LRRK2	120892	PRKACA	5566
MAVS	57506	PRKACA	5566
MRPS15	64960	PRKACB	5567
MAVS	57506	PRKACB	5567
MRPS15	64960	PRKACG	5568
LRRK2	120892	PRKAR1A	5573
MRPS15	64960	PRKAR1B	5575
LRRK2	120892	PRKAR2B	5577
TP53	7157	PRKCA	5578
CCAR2	57805	PRKCB	5579
TP53	7157	PRKCD	5580
LAP3	51056	PRKCE	5581
LRRK2	120892	PRKCI	5584
LRRK2	120892	PKN2	5586
CCAR2	57805	PRKD1	5587
TP53	7157	PRKD1	5587
PPP1CC	5501	PRKCZ	5590
LRRK2	120892	PRKCZ	5590
LRRK2	120892	PRKDC	5591
TP53	7157	PRKDC	5591
TP53	7157	MAPK1	5594
PPP1CC	5501	MAPK1	5594
TP53	7157	MAPK3	5595
TP53	7157	MAPK6	5597
ECI2	10455	MAPK6	5597
TP53	7157	MAPK7	5598
TP53	7157	MAPK8	5599
TP53	7157	MAPK9	5601
TP53	7157	MAPK10	5602
LRRK2	120892	MAP2K1	5604
LRRK2	120892	MAP2K2	5605
LRRK2	120892	MAP2K3	5606
LRRK2	120892	MAP2K6	5608
LRRK2	120892	MAP2K7	5609
LRRK2	120892	EIF2AK2	5610
MAVS	57506	EIF2AK2	5610
PPP1CC	5501	EIF2AK2	5610
TP53	7157	EIF2AK2	5610
TP53	7157	THAP12	5612
PPP2R2B	5521	PRPH	5630
LRRK2	120892	PRPS1	5631
LRRK2	120892	PSMA1	5682
LRRK2	120892	PSMA3	5684
LRRK2	120892	PSMA4	5685
CCAR2	57805	PSMA4	5685
MAVS	57506	PSMA7	5688
LRRK2	120892	PSMB1	5689
LRRK2	120892	PSMB2	5690
TP53	7157	PSMB3	5691
LRRK2	120892	PSMB3	5691
LRRK2	120892	PSMB4	5692
LRRK2	120892	PSMB5	5693
LRRK2	120892	PSMB6	5694
CCAR2	57805	PSMC1	5700
LRRK2	120892	PSMC3	5702
MAVS	57506	PSMC3	5702
TP53	7157	PSMC3	5702
LRRK2	120892	PSMC4	5704
TP53	7157	PSMC5	5705
LRRK2	120892	PSMC5	5705
LRRK2	120892	PSMC6	5706
LRRK2	120892	PSMD2	5708
CCAR2	57805	PSMD3	5709
LRRK2	120892	PSMD3	5709
LRRK2	120892	PSMD4	5710
TP53	7157	PSMD4	5710
TP53	7157	PSMD10	5716
LRRK2	120892	PSMD10	5716
TP53	7157	PSMD11	5717
LRRK2	120892	PSMD11	5717
PPP1CC	5501	PSME1	5720
LRRK2	120892	PTBP1	5725
TP53	7157	PTEN	5728
TP53	7157	PTGS2	5743
TP53	7157	PTK2	5747
LRRK2	120892	PTPN1	5770
LRRK2	120892	PTPN11	5781
CCAR2	57805	PTPN12	5782
MRPS15	64960	PTPRR	5801
ECI2	10455	PEX5	5830
LRRK2	120892	ALDH18A1	5832
LRRK2	120892	PYGB	5834
LRRK2	120892	PYGL	5836
LRRK2	120892	QARS1	5859
CCAR2	57805	QARS1	5859
LRRK2	120892	RAB1A	5861
TP53	7157	RAB4A	5867
CCAR2	57805	RAB5A	5868
LRRK2	120892	RAB5A	5868
LRRK2	120892	RAB5B	5869
LRRK2	120892	RABGGTB	5876
LRRK2	120892	RAC1	5879
CCAR2	57805	RAD21	5885
TP53	7157	RAD23A	5886
TP53	7157	RAD51	5888
CCAR2	57805	RAF1	5894
PPP1CC	5501	RAF1	5894
PPP2R2B	5521	RAF1	5894
LRRK2	120892	RANBP1	5902
TP53	7157	RANBP2	5903
LRRK2	120892	RANBP2	5903
LRRK2	120892	RANGAP1	5905
TP53	7157	RAP1B	5908
CCAR2	57805	RARS1	5917
LRRK2	120892	RARS1	5917
MAVS	57506	PLAAT4	5920
MRPL11	65003	RASA1	5921
TP53	7157	RB1	5925
PPP1CC	5501	RB1	5925
TP53	7157	RBBP4	5928
LRRK2	120892	RBBP4	5928
TP53	7157	RBBP5	5929
CCAR2	57805	RBBP5	5929
LRRK2	120892	RBBP6	5930
TP53	7157	RBBP6	5930
TP53	7157	RBBP7	5931
LRRK2	120892	RBBP7	5931
TP53	7157	RBM3	5935
LRRK2	120892	RCN2	5955
TP53	7157	RCN2	5955
LRRK2	120892	RECQL	5965
TP53	7157	REL	5966
TERT	7015	RELA	5970
CCAR2	57805	RELA	5970
TP53	7157	RELA	5970
CCAR2	57805	RELB	5971
LRRK2	120892	UPF1	5976
TP53	7157	RFC1	5981
LRRK2	120892	RFC1	5981
TP53	7157	RFC3	5983
LRRK2	120892	RFC4	5984
TP53	7157	RFC4	5984
TP53	7157	TRIM27	5987
LRRK2	120892	TRIM27	5987
LRRK2	120892	RGS2	5997
TP53	7157	RING1	6015
LRRK2	120892	RING1	6015
LRRK2	120892	RIT1	6016
TP53	7157	RNASEL	6041
MRPL11	65003	RNF2	6045
LAP3	51056	RNF2	6045
TP53	7157	RNF2	6045
MAVS	57506	RNF5	6048
LRRK2	120892	ABCE1	6059
PPP1CC	5501	ABCE1	6059
TP53	7157	ABCE1	6059
PPP1CC	5501	RORC	6097
TP53	7157	RORC	6097
PPP1CC	5501	RPA1	6117
CCAR2	57805	RPA1	6117
TP53	7157	RPA1	6117
LRRK2	120892	RPA1	6117
CCAR2	57805	RPA2	6118
PPP1CC	5501	RPA2	6118
TP53	7157	RPA2	6118
PPP1CC	5501	RPA3	6119
CCAR2	57805	RPA3	6119
PPP1CC	5501	RPL3	6122
LRRK2	120892	RPL3	6122
TP53	7157	RPL3	6122
TP53	7157	RPL4	6124
PPP1CC	5501	RPL4	6124
TP53	7157	RPL5	6125
PPP1CC	5501	RPL5	6125
TP53	7157	RPL6	6128
PPP1CC	5501	RPL7	6129
TP53	7157	RPL7	6129
LRRK2	120892	RPL7A	6130
TP53	7157	RPL7A	6130
LRRK2	120892	RPL8	6132
TP53	7157	RPL8	6132
PPP1CC	5501	RPL8	6132
LRRK2	120892	RPL9	6133
PPP1CC	5501	RPL10	6134
LRRK2	120892	RPL10	6134
LRRK2	120892	RPL11	6135
TP53	7157	RPL11	6135
LRRK2	120892	RPL12	6136
TP53	7157	RPL12	6136
LRRK2	120892	RPL13	6137
PPP1CC	5501	RPL13	6137
TP53	7157	RPL13	6137
TP53	7157	RPL15	6138
PPP2R2B	5521	RPL17	6139
TP53	7157	RPL18	6141
TP53	7157	RPL18A	6142
LRRK2	120892	RPL18A	6142
PPP1CC	5501	RPL18A	6142
TP53	7157	RPL19	6143
LRRK2	120892	RPL19	6143
TP53	7157	RPL21	6144
LRRK2	120892	RPL21	6144
LRRK2	120892	RPL22	6146
LRRK2	120892	RPL23A	6147
TP53	7157	RPL23A	6147
PPP2R2B	5521	RPL24	6152
TP53	7157	RPL24	6152
LRRK2	120892	RPL24	6152
LRRK2	120892	RPL26	6154
TP53	7157	RPL26	6154
TP53	7157	RPL27	6155
PPP1CC	5501	RPL27	6155
PPP1CC	5501	RPL30	6156
LRRK2	120892	RPL30	6156
TP53	7157	RPL30	6156
CCAR2	57805	RPL27A	6157
LRRK2	120892	RPL27A	6157
LRRK2	120892	RPL28	6158
TP53	7157	RPL28	6158
PPP1CC	5501	RPL28	6158
TP53	7157	RPL31	6160
LRRK2	120892	RPL34	6164
LRRK2	120892	RPL35A	6165
LRRK2	120892	RPL36AL	6166
LRRK2	120892	RPL37A	6168
TP53	7157	RPL37A	6168
LRRK2	120892	RPL36A	6173
LRRK2	120892	RPLP0	6175
TP53	7157	RPLP0	6175
PPP1CC	5501	RPLP2	6181
TP53	7157	RPLP2	6181
LRRK2	120892	RPLP2	6181
MRPL11	65003	MRPL12	6182
LRRK2	120892	RPN1	6184
TP53	7157	RPS2	6187
LRRK2	120892	RPS2	6187
TP53	7157	RPS3	6188
LRRK2	120892	RPS3	6188
LRRK2	120892	RPS3A	6189
TP53	7157	RPS3A	6189
PPP2R2B	5521	RPS4X	6191
LRRK2	120892	RPS4X	6191
TP53	7157	RPS4X	6191
LRRK2	120892	RPS5	6193
MRPL11	65003	RPS5	6193
PPP2R2B	5521	RPS6	6194
MRPS15	64960	RPS6	6194
TP53	7157	RPS6	6194
MRPL11	65003	RPS6	6194
LRRK2	120892	RPS6KA3	6197
CCAR2	57805	RPS6KA3	6197
TERT	7015	RPS6KB1	6198
PPP2R2B	5521	RPS6KB1	6198
LRRK2	120892	RPS6KB2	6199
TP53	7157	RPS7	6201
LRRK2	120892	RPS7	6201
TP53	7157	RPS8	6202
MRPL11	65003	RPS8	6202
LRRK2	120892	RPS8	6202
TP53	7157	RPS9	6203
LRRK2	120892	RPS9	6203
TP53	7157	RPS10	6204
LRRK2	120892	RPS10	6204
PPP2R2B	5521	RPS11	6205
LRRK2	120892	RPS11	6205
PPP1CC	5501	RPS11	6205
LRRK2	120892	RPS12	6206
LRRK2	120892	RPS13	6207
PPP1CC	5501	RPS13	6207
TP53	7157	RPS13	6207
LRRK2	120892	RPS14	6208
TP53	7157	RPS14	6208
PPP2R2B	5521	RPS14	6208
TP53	7157	RPS15	6209
LRRK2	120892	RPS15	6209
LRRK2	120892	RPS15A	6210
LRRK2	120892	RPS16	6217
TP53	7157	RPS16	6217
TP53	7157	RPS17	6218
LRRK2	120892	RPS17	6218
TP53	7157	RPS18	6222
LRRK2	120892	RPS18	6222
LRRK2	120892	RPS19	6223
TP53	7157	RPS19	6223
LRRK2	120892	RPS20	6224
LRRK2	120892	RPS23	6228
LRRK2	120892	RPS24	6229
TP53	7157	RPS24	6229
TP53	7157	RPS25	6230
LRRK2	120892	RPS25	6230
TP53	7157	RPS26	6231
PPP1CC	5501	RPS26	6231
TP53	7157	RPS27	6232
LRRK2	120892	RPS27	6232
TP53	7157	RPS27A	6233
LRRK2	120892	RPS27A	6233
LRRK2	120892	RPS29	6235
LRRK2	120892	RRM1	6240
TP53	7157	RRM2	6241
TP53	7157	RYK	6259
PPP1CC	5501	RYR2	6262
TP53	7157	S100A1	6271
TP53	7157	S100A2	6273
TP53	7157	S100A4	6275
TP53	7157	S100A6	6277
PPP2R2B	5521	S100A7	6278
PPP2R2B	5521	S100A8	6279
TP53	7157	S100A8	6279
LRRK2	120892	S100A8	6279
PPP2R2B	5521	S100A9	6280
TP53	7157	S100B	6285
TP53	7157	SAFB	6294
LRRK2	120892	SAFB	6294
TP53	7157	SAT1	6303
LRRK2	120892	ATXN2	6311
SNAP29	9342	SCO1	6341
MAVS	57506	SCO1	6341
ECI2	10455	SCP2	6342
TP53	7157	CCL18	6362
LRRK2	120892	CXCL11	6373
LRRK2	120892	SDHA	6389
LRRK2	120892	SDHB	6390
LRRK2	120892	MAP2K4	6416
TP53	7157	SET	6418
LRRK2	120892	SFPQ	6421
PPP1CC	5501	SFRP1	6422
PPP1CC	5501	SFRP2	6423
PPP1CC	5501	SFRP5	6425
TP53	7157	SRSF1	6426
TP53	7157	SRSF6	6431
LRRK2	120892	SRSF7	6432
LAP3	51056	SH3GL1	6455
LRRK2	120892	SH3GL1	6455
LRRK2	120892	SH3GL2	6456
LRRK2	120892	SH3GL3	6457
LRRK2	120892	SHMT2	6472
FOXRED1	55572	SHMT2	6472
PPP1CC	5501	SIAH2	6478
TP53	7157	SKI	6497
TP53	7157	SKP1	6500
PPP1CC	5501	SKP1	6500
LRRK2	120892	SLC1A5	6510
MAVS	57506	SLC7A1	6541
LRRK2	120892	SLC12A2	6558
LRRK2	120892	SLC16A1	6566
LRRK2	120892	SLC25A1	6576
TP53	7157	SNAI2	6591
ECI2	10455	SMARCA2	6595
TERT	7015	SMARCA4	6597
TP53	7157	SMARCA4	6597
TP53	7157	SMARCB1	6598
PPP1CC	5501	SMARCB1	6598
TP53	7157	SMARCC1	6599
ECI2	10455	SMARCD1	6602
TP53	7157	SMARCD1	6602
TP53	7157	SMARCD2	6603
ECI2	10455	SMARCD2	6603
DUS2	54920	NA	6606
TP53	7157	NA	6606
LRRK2	120892	SMS	6611
TP53	7157	SUMO3	6612
CCAR2	57805	SUMO2	6613
LRRK2	120892	SUMO2	6613
TP53	7157	SUMO2	6613
TP53	7157	SNAI1	6615
LRRK2	120892	SNCA	6622
LRRK2	120892	FSCN1	6624
LRRK2	120892	SNRNP70	6625
AGMAT	79814	SNRPA	6626
LRRK2	120892	SNRPA1	6627
LRRK2	120892	SNRPB2	6629
LRRK2	120892	SNRPD1	6632
PPP1CC	5501	SNRPD2	6633
LRRK2	120892	SNRPD2	6633
LRRK2	120892	SNRPD3	6634
TP53	7157	SNRPD3	6634
LRRK2	120892	SNRPE	6635
TP53	7157	SNRPN	6638
CCAR2	57805	SOD1	6647
MAVS	57506	SOD1	6647
LRRK2	120892	SON	6651
CCAR2	57805	SOX2	6657
TP53	7157	SOX4	6659
TP53	7157	SP1	6667
PPP1CC	5501	SP3	6670
TP53	7157	SP3	6670
LRRK2	120892	UAP1	6675
LRRK2	120892	SPRR1B	6699
TERT	7015	SRC	6714
TP53	7157	SRC	6714
MAVS	57506	SRC	6714
CCAR2	57805	SRC	6714
MRPS15	64960	SRC	6714
TP53	7157	SREBF2	6721
LRRK2	120892	SRM	6723
LRRK2	120892	SRP9	6726
LRRK2	120892	SRP14	6727
LRRK2	120892	SRP54	6729
LRRK2	120892	SRP68	6730
LRRK2	120892	SRPK1	6732
TP53	7157	SRPK1	6732
LRRK2	120892	SRPRA	6734
LRRK2	120892	RO60	6738
LRRK2	120892	SSBP1	6742
MRPL11	65003	SSBP1	6742
LRRK2	120892	SSR4	6748
LRRK2	120892	SSRP1	6749
TP53	7157	SSTR3	6753
LRRK2	120892	STAC	6769
LRRK2	120892	STAT1	6772
MAVS	57506	STAT1	6772
TP53	7157	STAT6	6778
MAVS	57506	STAT6	6778
PPP1CC	5501	STAU1	6780
TP53	7157	SULT1E1	6783
LRRK2	120892	NEK4	6787
CCAR2	57805	NEK4	6787
PPP1CC	5501	NEK4	6787
LRRK2	120892	STK3	6788
TP53	7157	STK4	6789
TP53	7157	AURKA	6790
PPP1CC	5501	AURKA	6790
TP53	7157	STK11	6794
SNAP29	9342	STX1A	6804
SNAP29	9342	STX3	6809
SNAP29	9342	STX4	6810
SNAP29	9342	STX5	6811
TP53	7157	STX5	6811
LRRK2	120892	STXBP3	6814
LRRK2	120892	SUPT4H1	6827
LRRK2	120892	SUPT6H	6830
TP53	7157	SUPT6H	6830
LRRK2	120892	SUPV3L1	6832
LRRK2	120892	SURF4	6836
PPP1CC	5501	SVIL	6840
SNAP29	9342	VAMP7	6845
TP53	7157	TADA2A	6871
TP53	7157	TAF1	6872
LRRK2	120892	TAF4	6874
TP53	7157	TAF5	6877
TP53	7157	TAF6	6878
TP53	7157	TAF9	6880
TP53	7157	TAF10	6881
MAVS	57506	MAP3K7	6885
LRRK2	120892	TARS1	6897
LRRK2	120892	TBCE	6905
TP53	7157	TBP	6908
LRRK2	120892	TCEA2	6919
LRRK2	120892	ELOC	6921
TP53	7157	TCF4	6925
MRPS15	64960	TCF7L2	6934
LRRK2	120892	TCOF1	6949
LRRK2	120892	TCP1	6950
PPP2R2B	5521	TCP1	6950
TP53	7157	TCP1	6950
PPP1CC	5501	PPP1R11	6992
TP53	7157	TDG	6996
LAP3	51056	PRDX2	7001
TP53	7157	TEC	7006
TP53	7157	TEP1	7011
TERT	7015	TEP1	7011
TERT	7015	NA	7012
TERT	7015	TERF1	7013
TERT	7015	TERF2	7014
TERT	7015	TERT	7015
TP53	7157	TFAP2A	7020
TP53	7157	TFAP2B	7021
TP53	7157	TFAP2C	7022
TP53	7157	TFAP4	7023
TP53	7157	TFDP1	7027
TP53	7157	TFRC	7037
TP53	7157	TGM2	7052
LRRK2	120892	TGM3	7053
LRRK2	120892	THOP1	7064
TP53	7157	THRB	7068
LRRK2	120892	TK1	7083
TP53	7157	TK1	7083
DUS2	54920	TK1	7083
LAP3	51056	TKT	7086
LRRK2	120892	TKT	7086
LRRK2	120892	TLE4	7091
LRRK2	120892	TLN1	7094
MAVS	57506	TLR1	7096
MAVS	57506	TSPAN6	7105
LRRK2	120892	NA	7112
CCAR2	57805	NA	7112
TP53	7157	TMSB4X	7114
TP53	7157	TNFAIP3	7128
TP53	7157	TOP1	7150
TP53	7157	TOP2A	7153
TP53	7157	TOP2B	7155
PPP1CC	5501	TP53	7157
TP53	7157	TP53	7157
LRRK2	120892	TP53	7157
CCAR2	57805	TP53	7157
TP53	7157	TP53BP1	7158
LRRK2	120892	TP53BP1	7158
PPP1CC	5501	TP53BP2	7159
TP53	7157	TP53BP2	7159
TP53	7157	TP73	7161
LRRK2	120892	TPI1	7167
TP53	7157	TPM1	7168
LRRK2	120892	TPM1	7168
LRRK2	120892	TPM2	7169
LRRK2	120892	TPM3	7170
TP53	7157	TPM3	7170
PPP1CC	5501	TPM3	7170
TP53	7157	TPM4	7171
PPP1CC	5501	TPM4	7171
LRRK2	120892	TPR	7175
TP53	7157	TPT1	7178
TP53	7157	HSP90B1	7184
LRRK2	120892	HSP90B1	7184
ECI2	10455	TRAF1	7185
MAVS	57506	TRAF1	7185
MAVS	57506	TRAF2	7186
LRRK2	120892	TRAF2	7186
SNAP29	9342	TRAF3	7187
PPP1CC	5501	TRAF3	7187
MAVS	57506	TRAF3	7187
MAVS	57506	TRAF5	7188
MAVS	57506	TRAF6	7189
TP53	7157	TRAF6	7189
PPP1CC	5501	TRAF6	7189
SNAP29	9342	TRAF6	7189
PPP2R2B	5521	CCT3	7203
LRRK2	120892	CCT3	7203
TP53	7157	CCT3	7203
LRRK2	120892	TSN	7247
TP53	7157	TSG101	7251
LRRK2	120892	TSG101	7251
SNAP29	9342	EIPR1	7260
LRRK2	120892	DNAJC7	7266
TP53	7157	DNAJC7	7266
LRRK2	120892	TTC4	7268
TP53	7157	TTK	7272
TP53	7157	TUBA4A	7277
LRRK2	120892	TUBA4A	7277
LRRK2	120892	TUBB2A	7280
TP53	7157	TUBB2A	7280
TP53	7157	TUBG1	7283
LRRK2	120892	TUBG1	7283
MRPL11	65003	TUFM	7284
PPP2R2B	5521	TUFM	7284
LRRK2	120892	TUFM	7284
TP53	7157	TWIST1	7291
TP53	7157	TXN	7295
TP53	7157	TXNRD1	7296
TP53	7157	UBB	7314
TP53	7157	UBA1	7317
TP53	7157	UBE2A	7319
TP53	7157	UBE2B	7320
TP53	7157	UBE2D1	7321
TERT	7015	UBE2D3	7323
LRRK2	120892	UBE2D3	7323
TP53	7157	UBE2E1	7324
LRRK2	120892	UBE2E1	7324
TP53	7157	UBE2I	7329
TP53	7157	UBE2L3	7332
TP53	7157	UBE2N	7334
ECI2	10455	UBE3A	7337
TP53	7157	UBE3A	7337
PPP1CC	5501	SUMO1	7341
TP53	7157	SUMO1	7341
LRRK2	120892	UCHL1	7345
TP53	7157	UCHL1	7345
LRRK2	120892	UFD1	7353
TP53	7157	UFD1	7353
LRRK2	120892	UGDH	7358
LRRK2	120892	UCK2	7371
LRRK2	120892	UMPS	7372
LRRK2	120892	UQCRB	7381
LRRK2	120892	UQCRC1	7384
LRRK2	120892	UQCRC2	7385
LRRK2	120892	UQCRFS1	7386
PPP1CC	5501	USF1	7391
TP53	7157	KDM6A	7403
LAP3	51056	VARS1	7407
TP53	7157	VASP	7408
SNAP29	9342	VCAM1	7412
PPP1CC	5501	VCP	7415
TP53	7157	VCP	7415
LRRK2	120892	VDAC1	7416
LRRK2	120892	VDAC3	7419
TP53	7157	VDR	7421
PPP1CC	5501	VDR	7421
TP53	7157	VHL	7428
TP53	7157	VIM	7431
LRRK2	120892	VIM	7431
MAVS	57506	VIPR2	7434
TP53	7157	VRK1	7443
TP53	7157	VRK2	7444
LRRK2	120892	WARS1	7453
LRRK2	120892	WIPF1	7456
TP53	7157	WRN	7486
TP53	7157	WT1	7490
TP53	7157	XPC	7508
LRRK2	120892	XPNPEP1	7511
SNAP29	9342	XPO1	7514
TRAK1	22906	XPO1	7514
LRRK2	120892	XPO1	7514
TERT	7015	XPO1	7514
TP53	7157	XPO1	7514
CCAR2	57805	XPO1	7514
TP53	7157	XRCC1	7515
LRRK2	120892	XRCC5	7520
TERT	7015	XRCC5	7520
LRRK2	120892	YY1	7528
TP53	7157	YY1	7528
LRRK2	120892	YWHAB	7529
TP53	7157	YWHAB	7529
PPP1CC	5501	YWHAB	7529
TP53	7157	YWHAE	7531
LRRK2	120892	YWHAE	7531
LRRK2	120892	YWHAG	7532
TP53	7157	YWHAG	7532
LRRK2	120892	YWHAH	7533
PPP1CC	5501	YWHAZ	7534
TP53	7157	YWHAZ	7534
TERT	7015	YWHAZ	7534
LRRK2	120892	YWHAZ	7534
LRRK2	120892	ZAP70	7535
LRRK2	120892	SF1	7536
TP53	7157	ZIC3	7547
LRRK2	120892	CNBP	7555
TP53	7157	ZNF24	7572
PPP2R2B	5521	ZNF136	7695
TP53	7157	ZBTB16	7704
MAVS	57506	TRIM25	7706
PPP1CC	5501	TRIM25	7706
PPP2R2B	5521	TRIM25	7706
TP53	7157	ZNF148	7707
TP53	7157	ZBTB17	7709
LRRK2	120892	ZFAND5	7763
TP53	7157	PRDM2	7799
LRRK2	120892	DAP3	7818
MRPS15	64960	DAP3	7818
TP53	7157	MOGS	7841
LRRK2	120892	MOGS	7841
TP53	7157	TUBA1A	7846
LRRK2	120892	TUBA1A	7846
CCAR2	57805	TUBA1A	7846
LRRK2	120892	FZD5	7855
LRRK2	120892	USP7	7874
TP53	7157	USP7	7874
LAP3	51056	RAB7A	7879
LRRK2	120892	RAB7A	7879
LRRK2	120892	DEK	7913
TP53	7157	PRRC2A	7916
MAVS	57506	BAG6	7917
LRRK2	120892	DDX39B	7919
CCAR2	57805	AIMP2	7965
TP53	7157	AIMP2	7965
TP53	7157	MAFK	7975
TP53	7157	KAT6A	7994
PPP1CC	5501	STAM	8027
PPP1CC	5501	SHOC2	8036
SNAP29	9342	RASSF7	8045
PPP1CC	5501	RASSF7	8045
LRRK2	120892	CUL5	8065
TP53	7157	FXR1	8087
TP53	7157	HMGA2	8091
AGMAT	79814	DPF3	8110
ECI2	10455	DPF3	8110
TP53	7157	NPRL3	8131
LRRK2	120892	SLC7A5	8140
LRRK2	120892	COIL	8161
TERT	7015	COIL	8161
CCAR2	57805	SF3A2	8175
TP53	7157	ELL	8178
FOXRED1	55572	CLPP	8192
LRRK2	120892	CLPP	8192
TP53	7157	NCOA3	8202
TP53	7157	ESS2	8220
TP53	7157	USP11	8237
LRRK2	120892	USP9X	8239
ECI2	10455	USP9X	8239
LRRK2	120892	SMC1A	8243
LRRK2	120892	NAA10	8260
TP53	7157	ARID1A	8289
ECI2	10455	ARID1A	8289
LRRK2	120892	NA	8293
TP53	7157	TRRAP	8295
TP53	7157	AXIN1	8312
LRRK2	120892	CDC45	8318
MRPL11	65003	H2BC9	8345
LRRK2	120892	NA	8350
LRRK2	120892	PIP5K1A	8394
LRRK2	120892	SLC25A11	8402
LRRK2	120892	TAGLN2	8407
PPP1CC	5501	UXT	8409
TP53	7157	EEA1	8411
SNAP29	9342	STX7	8417
LRRK2	120892	STK24	8428
TP53	7157	NR0B2	8431
TERT	7015	DYRK2	8445
LRRK2	120892	DYRK2	8445
MRPS15	64960	DUSP11	8446
LRRK2	120892	DHX16	8449
LRRK2	120892	CUL4B	8450
TP53	7157	CUL4B	8450
TP53	7157	CUL4A	8451
MRPS15	64960	CUL3	8452
PPP2R2B	5521	CUL3	8452
LRRK2	120892	CUL3	8452
CCAR2	57805	CUL3	8452
MRPL11	65003	CUL3	8452
LRRK2	120892	CUL1	8454
MRPL11	65003	CUL1	8454
PPP1CC	5501	CUL1	8454
TP53	7157	FOXN1	8456
TP53	7157	SUPT3H	8464
TP53	7157	SMARCA5	8467
LRRK2	120892	SMARCA5	8467
TP53	7157	IRS4	8471
LRRK2	120892	IRS4	8471
PPP2R2B	5521	IRS4	8471
LAP3	51056	OGT	8473
SNAP29	9342	OGT	8473
PPP1CC	5501	OGT	8473
TRAK1	22906	OGT	8473
LRRK2	120892	OGT	8473
TP53	7157	RAE1	8480
TP53	7157	OFD1	8481
TP53	7157	PPM1D	8493
TP53	7157	PPFIBP1	8496
LRRK2	120892	PPFIA1	8500
TP53	7157	PIK3R3	8503
LRRK2	120892	NIPSNAP1	8508
CCAR2	57805	KCNAB2	8514
PPP1CC	5501	IKBKG	8517
MAVS	57506	IKBKG	8517
LRRK2	120892	HAT1	8520
TP53	7157	DGKZ	8525
LRRK2	120892	COPS3	8533
LRRK2	120892	API5	8539
LRRK2	120892	AGPS	8540
LRRK2	120892	AP3B1	8546
TP53	7157	MAPKAPK5	8550
PPP1CC	5501	BHLHE40	8553
TP53	7157	BHLHE40	8553
TP53	7157	PIAS1	8554
PPP1CC	5501	PIAS1	8554
TP53	7157	CDC14B	8555
MRPS15	64960	CDC14B	8555
TP53	7157	CDC14A	8556
LRRK2	120892	AKR7A2	8574
TP53	7157	PRKRA	8575
LRRK2	120892	PRKRA	8575
MAVS	57506	SLC25A12	8604
TERT	7015	RUVBL1	8607
TP53	7157	RUVBL1	8607
TP53	7157	USO1	8615
LRRK2	120892	USO1	8615
TP53	7157	TP63	8626
CCAR2	57805	OASL	8638
TP53	7157	NCOA1	8648
TP53	7157	NUMB	8650
TP53	7157	SOCS1	8651
PPP2R2B	5521	DYNLL1	8655
LRRK2	120892	EIF3A	8661
LRRK2	120892	EIF3B	8662
LRRK2	120892	EIF3D	8664
TP53	7157	EIF3F	8665
LRRK2	120892	EIF3G	8666
SNAP29	9342	VAMP8	8673
TP53	7157	BECN1	8678
LRRK2	120892	CDC23	8697
LRRK2	120892	TRADD	8717
CCAR2	57805	TRADD	8717
LRRK2	120892	SNX3	8724
PPP1CC	5501	URI1	8725
CCAR2	57805	GBF1	8729
LRRK2	120892	RIPK1	8737
CCAR2	57805	RIPK1	8737
PPP1CC	5501	PABPC4	8761
LRRK2	120892	RAB11A	8766
LRRK2	120892	RIPK2	8767
MAVS	57506	RIPK2	8767
LRRK2	120892	FADD	8772
MAVS	57506	FADD	8772
SNAP29	9342	NAPA	8775
LRRK2	120892	SCEL	8796
LRRK2	120892	SUCLG2	8801
LRRK2	120892	SUCLG1	8802
TP53	7157	TRIM24	8805
PPP2R2B	5521	IQGAP1	8826
CCAR2	57805	IQGAP1	8826
LRRK2	120892	IQGAP1	8826
PPP1CC	5501	IQGAP1	8826
TP53	7157	IQGAP1	8826
LRRK2	120892	GMPS	8833
TP53	7157	GMPS	8833
LRRK2	120892	TMEM11	8834
TP53	7157	CFLAR	8837
TP53	7157	HDAC3	8841
TP53	7157	KSR1	8844
SNAP29	9342	KSR1	8844
TP53	7157	TSC22D1	8848
TP53	7157	KAT2B	8850
PPP1CC	5501	AKAP4	8852
TP53	7157	NR1I2	8856
TP53	7157	PER2	8864
LRRK2	120892	CDC123	8872
LRRK2	120892	ARHGEF7	8874
LRRK2	120892	SQSTM1	8878
TP53	7157	SQSTM1	8878
LRRK2	120892	SGPL1	8879
LAP3	51056	FUBP1	8880
LRRK2	120892	NAE1	8883
MAVS	57506	TAX1BP1	8887
MRPL11	65003	TAX1BP1	8887
LRRK2	120892	EIF2B3	8891
LRRK2	120892	EIF2B2	8892
LRRK2	120892	EIF2B5	8893
TP53	7157	EIF2S2	8894
CCAR2	57805	CCNA1	8900
LRRK2	120892	HERC2	8924
ECI2	10455	HERC2	8924
MAVS	57506	HERC2	8924
TP53	7157	HERC2	8924
TP53	7157	SNURF	8926
CCAR2	57805	FOXH1	8928
LRRK2	120892	RAB29	8934
LRRK2	120892	AP3D1	8943
TP53	7157	BTRC	8945
TP53	7157	NOL3	8996
TP53	7157	TAF1C	9013
TP53	7157	TAF1B	9014
TP53	7157	TAF1A	9015
LAP3	51056	UBE2M	9040
LRRK2	120892	UBE2M	9040
TP53	7157	UBE2M	9040
LRRK2	120892	RPL14	9045
PPP1CC	5501	RPL14	9045
TP53	7157	RPL14	9045
PPP2R2B	5521	MAP7	9053
LRRK2	120892	PAPSS1	9061
TP53	7157	PIAS2	9063
TP53	7157	ASH2L	9070
CCAR2	57805	ASH2L	9070
TP53	7157	SART1	9092
TP53	7157	USP10	9100
LRRK2	120892	USP10	9100
LRRK2	120892	MTA1	9112
TP53	7157	MTA1	9112
LRRK2	120892	LATS1	9113
PPP1CC	5501	LATS1	9113
ECI2	10455	PDLIM1	9124
LRRK2	120892	FAM50A	9130
LRRK2	120892	AIFM1	9131
SNAP29	9342	AIFM1	9131
MAVS	57506	AIFM1	9131
MAVS	57506	ATG12	9140
TP53	7157	PDCD5	9141
TRAK1	22906	HGS	9146
LRRK2	120892	NEMF	9147
PPP1CC	5501	RASSF9	9182
LRRK2	120892	BUB3	9184
LRRK2	120892	DDX21	9188
LRRK2	120892	ZMYM5	9205
TP53	7157	AURKB	9212
LRRK2	120892	AURKB	9212
LRRK2	120892	MTA2	9219
TP53	7157	MTA2	9219
LRRK2	120892	RAB11B	9230
TP53	7157	PTTG1	9232
MRPL11	65003	PNMA1	9240
CCAR2	57805	PNMA1	9240
CCAR2	57805	AIMP1	9255
LRRK2	120892	AIMP1	9255
TP53	7157	PDLIM7	9260
TP53	7157	PIWIL1	9271
LRRK2	120892	COPB2	9276
AGMAT	79814	SRSF11	9295
LRRK2	120892	SRSF11	9295
ECI2	10455	SOCS6	9306
TP53	7157	KLF4	9314
TP53	7157	COPS2	9318
LRRK2	120892	TRIP13	9319
MRPL11	65003	TRIP4	9325
LRRK2	120892	GTF3C5	9328
LRRK2	120892	GTF3C4	9329
TP53	7157	GTF3C4	9329
TP53	7157	GTF3C3	9330
LRRK2	120892	GTF3C3	9330
TP53	7157	TCEAL1	9338
CCAR2	57805	EFTUD2	9343
ECI2	10455	EFTUD2	9343
MRPL11	65003	EFTUD2	9343
TP53	7157	RPL23	9349
LRRK2	120892	RPL23	9349
PPP2R2B	5521	RPL23	9349
MAVS	57506	UBE4A	9354
LRRK2	120892	UBE4A	9354
FOXRED1	55572	LONP1	9361
PPP1CC	5501	ZFYVE9	9372
LRRK2	120892	TM9SF2	9375
CCAR2	57805	CIAO1	9391
LRRK2	120892	CIAO1	9391
TP53	7157	NMT2	9397
PPP2R2B	5521	RECQL4	9401
LRRK2	120892	ZRANB2	9406
TP53	7157	MED21	9412
TP53	7157	MED17	9440
TP53	7157	HOMER3	9454
TP53	7157	EIF4E2	9470
MAVS	57506	ATG5	9474
LRRK2	120892	ROCK2	9475
CCAR2	57805	MAGED1	9500
LRRK2	120892	FXR2	9513
TP53	7157	TBPL1	9519
LRRK2	120892	NPEPPS	9520
CCAR2	57805	EEF1E1	9521
LRRK2	120892	EEF1E1	9521
LRRK2	120892	TECR	9524
LRRK2	120892	BAG5	9529
TP53	7157	BAG5	9529
LRRK2	120892	BAG3	9531
ECI2	10455	BAG3	9531
LRRK2	120892	BAG2	9532
TP53	7157	BAG2	9532
PPP2R2B	5521	BAG2	9532
LRRK2	120892	POLR1C	9533
LRRK2	120892	SEC22B	9554
LRRK2	120892	CHD1L	9557
LRRK2	120892	VPS26A	9559
FOXRED1	55572	MINPP1	9562
LRRK2	120892	GTPBP1	9567
PPP1CC	5501	CLOCK	9575
TP53	7157	BABAM2	9577
LRRK2	120892	PREPL	9581
PPP1CC	5501	APOBEC3B	9582
TP53	7157	RBM39	9584
LRRK2	120892	RBM39	9584
LAP3	51056	RBM39	9584
TP53	7157	MAD2L1BP	9587
TP53	7157	AKAP12	9590
PPP2R2B	5521	IER2	9592
LRRK2	120892	PDIA4	9601
TP53	7157	NCOR1	9611
PPP1CC	5501	NCOR1	9611
TP53	7157	NCOR2	9612
PPP1CC	5501	AATK	9625
PPP1CC	5501	SNCAIP	9627
LRRK2	120892	NUP155	9631
LRRK2	120892	SEC24C	9632
LAP3	51056	ISG15	9636
MAVS	57506	IKBKE	9641
TP53	7157	MDC1	9656
TP53	7157	CEP135	9662
PPP1CC	5501	SAFB2	9667
TP53	7157	SAFB2	9667
LRRK2	120892	SAFB2	9667
TP53	7157	EIF5B	9669
LRRK2	120892	TTI1	9675
LRRK2	120892	VGLL4	9686
LRRK2	120892	NUP93	9688
LRRK2	120892	BZW1	9689
LAP3	51056	RAPGEF2	9693
LRRK2	120892	PUM1	9698
TERT	7015	DCAF1	9730
TP53	7157	DCAF1	9730
LRRK2	120892	SART3	9733
AGMAT	79814	SART3	9733
TP53	7157	HDAC9	9734
CCAR2	57805	HDAC9	9734
LRRK2	120892	KNTC1	9735
TP53	7157	SETD1A	9739
LRRK2	120892	TCAF1	9747
LRRK2	120892	SLK	9748
PPP1CC	5501	ZFYVE16	9765
LRRK2	120892	BCLAF1	9774
LRRK2	120892	MATR3	9782
LRRK2	120892	CKAP5	9793
TP53	7157	MAML1	9794
LRRK2	120892	MRPL19	9801
MRPL11	65003	MRPL19	9801
MAVS	57506	TOMM20	9804
SNAP29	9342	TOMM20	9804
TRAK1	22906	TOMM20	9804
TP53	7157	KIAA0087	9808
SNAP29	9342	RNF40	9810
TP53	7157	RNF40	9810
LRRK2	120892	RNF40	9810
TP53	7157	CUL7	9820
TP53	7157	RB1CC1	9821
TP53	7157	ARHGEF17	9828
MAVS	57506	TRIM14	9830
LRRK2	120892	CEP170	9859
CCAR2	57805	CEP170	9859
[truncated: 1,496 more rows]
