# Supplementary material for: Protein network analysis links the NSL complex to Parkinson’s disease via mitochondrial and nuclear biology
Source: Royal Society of Chemistry journal article supplement (doi:10.1039/d2mo00325b), 2023-06-14
Supplement: d2mo00325b8.xlsx [file d2mo00325b8.xlsx]

## Sheet: Supplementary Table 7
Seed:Gene Name	Seed: Entrez ID	Interactor: Gene Name	Interactor: Entrez ID	CS
ATN1	1822	BAIAP2	10458	5
ATN1	1822	EWSR1	2130	4
ATN1	1822	ITCH	83737	3
ATN1	1822	MAGI1	9223	3
ATN1	1822	MAGI2	9863	3
ATN1	1822	PLEKHA5	54477	3
ATN1	1822	RBFOX1	54715	4
ATN1	1822	RERE	473	4
ATN1	1822	RHOXF2	84528	3
ATN1	1822	RUNX1T1	862	4
ATN1	1822	SIAH1	6477	3
ATN1	1822	TRIP6	7205	4
ATN1	1822	WDR5	11091	8
ATN1	1822	WWP1	11059	3
ATN1	1822	WWP2	11060	4
CAMK2D	817	ARHGAP25	9938	3
CAMK2D	817	BANP	54971	3
CAMK2D	817	CAMK2A	815	10
CAMK2D	817	CAMK2B	816	7
CAMK2D	817	CAMK2D	817	5
CAMK2D	817	CAMK2G	818	7
CAMK2D	817	DNAL4	10126	3
CAMK2D	817	ECHS1	1892	3
CAMK2D	817	FNDC3B	64778	4
CAMK2D	817	HDAC4	9759	5
CAMK2D	817	ITPR1	3708	4
CAMK2D	817	ITPR2	3709	4
CAMK2D	817	MAGEB4	4115	3
CAMK2D	817	MRPL11	65003	3
CAMK2D	817	MYC	4609	5
CAMK2D	817	OGT	8473	4
CAMK2D	817	SCN5A	6331	4
CAMK2D	817	TIRAP	114609	3
CAMK2D	817	TNPO2	30000	3
CAMK2D	817	TTC5	91875	4
CCAR2	57805	CDK9	1025	4
CCAR2	57805	CEP170	9859	5
CCAR2	57805	CEP170P1	645455	6
CCAR2	57805	COPS5	10987	3
CCAR2	57805	CUL3	8452	3
CCAR2	57805	FOXB1	27023	3
CCAR2	57805	FOXH1	8928	3
CCAR2	57805	FOXP3	50943	3
CCAR2	57805	FOXQ1	94234	3
CCAR2	57805	HAO1	54363	3
CCAR2	57805	HNRNPA1	3178	4
CCAR2	57805	HSD17B10	3028	3
CCAR2	57805	HSPA8	3312	5
CCAR2	57805	KCNAB2	8514	3
CCAR2	57805	MCC	4163	3
CCAR2	57805	MYC	4609	7
CCAR2	57805	PPP2R2A	5520	3
CCAR2	57805	PPP2R2B	5521	3
CCAR2	57805	PPP2R2D	55844	3
CCAR2	57805	SIRT1	23411	3
CCAR2	57805	SOD1	6647	3
CCAR2	57805	SOX2	6657	4
CCAR2	57805	TUBA1A	7846	3
CCAR2	57805	TUBB3	10381	3
CCAR2	57805	TUBB8	347688	3
CCAR2	57805	ZNF335	63925	5
CSTA	1475	CTSB	1508	5
CSTA	1475	CTSL	1514	3
CSTA	1475	CUL2	8453	3
CSTA	1475	CUL4B	8450	3
CSTA	1475	EGFR	1956	3
CSTA	1475	FOXR1	283150	3
CYLD	1540	AKT1	207	3
CYLD	1540	AURKB	9212	3
CYLD	1540	CEP192	55125	5
CYLD	1540	CLIP3	25999	3
CYLD	1540	CYLD	1540	4
CYLD	1540	DDX58	23586	3
CYLD	1540	FGL2	10875	3
CYLD	1540	HDAC6	10013	4
CYLD	1540	IKBKE	9641	5
CYLD	1540	IKBKG	8517	13
CYLD	1540	ITCH	83737	3
CYLD	1540	LMNA	4000	4
CYLD	1540	MAP3K7	6885	3
CYLD	1540	MAPRE1	22919	5
CYLD	1540	MAVS	57506	3
CYLD	1540	MIB2	142678	3
CYLD	1540	OPTN	10133	6
CYLD	1540	PTPA	5524	3
CYLD	1540	RIPK1	8737	4
CYLD	1540	RNF31	55072	7
CYLD	1540	SHARPIN	81858	3
CYLD	1540	SPATA2	9825	6
CYLD	1540	SPATA2L	124044	3
CYLD	1540	SPHK1	8877	3
CYLD	1540	TBK1	29110	4
CYLD	1540	TNF	7124	3
CYLD	1540	TNFRSF1A	7132	4
CYLD	1540	TP53	7157	4
CYLD	1540	TRAF2	7186	7
CYLD	1540	TRAF6	7189	6
CYLD	1540	TRAIP	10293	3
CYLD	1540	TUBA1A	7846	5
CYLD	1540	UBC	7316	4
CYLD	1540	YWHAB	7529	3
HTT	3064	ACTG1	71	4
HTT	3064	AGO2	27161	3
HTT	3064	AKT1	207	4
HTT	3064	ALDOA	226	4
HTT	3064	AMFR	267	3
HTT	3064	AP2A2	161	3
HTT	3064	AP2B1	163	4
HTT	3064	ARFGAP3	26286	4
HTT	3064	ASPH	444	4
HTT	3064	ATG5	9474	3
HTT	3064	BAIAP2	10458	3
HTT	3064	BCAP31	10134	4
HTT	3064	BECN1	8678	4
HTT	3064	CCDC126	90693	3
HTT	3064	CCT6A	908	4
HTT	3064	CCT8	10694	4
HTT	3064	CD59	966	4
HTT	3064	CEP126	57562	3
HTT	3064	CEP63	80254	3
HTT	3064	CETN2	1069	4
HTT	3064	CHCHD2	51142	4
HTT	3064	CHD3	1107	3
HTT	3064	CHMP4B	128866	3
HTT	3064	CNOT10	25904	4
HTT	3064	CNOT7	29883	4
HTT	3064	CNP	1267	4
HTT	3064	COPB1	1315	3
HTT	3064	COPS3	8533	4
HTT	3064	COX5B	1329	4
HTT	3064	COX6A1	1337	4
HTT	3064	COX6C	1345	4
HTT	3064	CREB1	1385	5
HTT	3064	CREBBP	1387	10
HTT	3064	CRMP1	1400	4
HTT	3064	CTNNB1	1499	5
HTT	3064	CUL5	8065	3
HTT	3064	CYC1	1537	4
HTT	3064	DCAF7	10238	4
HTT	3064	DCTN2	10540	3
HTT	3064	DDB1	1642	4
HTT	3064	DNAJA1	3301	5
HTT	3064	DNAJA3	9093	3
HTT	3064	DNAJB6	10049	4
HTT	3064	DNAJC4	3338	3
HTT	3064	DNALI1	7802	4
HTT	3064	DNM2	1785	3
HTT	3064	DPYSL2	1808	4
HTT	3064	DYNC1H1	1778	4
HTT	3064	DYNLL1	8655	4
HTT	3064	ECH1	1891	3
HTT	3064	EEF1B2	1933	4
HTT	3064	EEF1D	1936	6
HTT	3064	EIF3G	8666	4
HTT	3064	EIF3I	8668	4
HTT	3064	EIF4E2	9470	4
HTT	3064	ELP1	8518	3
HTT	3064	ENO1	2023	4
HTT	3064	ERCC6L	54821	4
HTT	3064	EVL	51466	4
HTT	3064	EZR	7430	3
HTT	3064	FAM71F1	84691	3
HTT	3064	FASN	2194	4
HTT	3064	FEZ1	9638	6
HTT	3064	FICD	11153	4
HTT	3064	FLOT1	10211	4
HTT	3064	FTL	2512	4
HTT	3064	G3BP1	10146	4
HTT	3064	GAPDH	2597	5
HTT	3064	GFAP	2670	4
HTT	3064	GIT1	28964	5
HTT	3064	GNAO1	2775	4
HTT	3064	GNB1	2782	4
HTT	3064	GNB2	2783	4
HTT	3064	GOLPH3L	55204	4
HTT	3064	GPM6A	2823	4
HTT	3064	GPRASP2	114928	3
HTT	3064	GRB2	2885	3
HTT	3064	GTF3C3	9330	3
HTT	3064	H2AP	25763	4
HTT	3064	HAP1	9001	9
HTT	3064	HAX1	10456	3
HTT	3064	HEY2	23493	4
HTT	3064	HIP1	3092	9
HTT	3064	HLA-B	3106	3
HTT	3064	HMG20A	10363	4
HTT	3064	HMGA1	3159	3
HTT	3064	HMGB1	3146	4
HTT	3064	HNRNPC	3183	4
HTT	3064	HOXC11	3227	3
HTT	3064	HOXC4	3221	3
HTT	3064	HSPA8	3312	7
HTT	3064	HTT	3064	8
HTT	3064	HYPK	25764	6
HTT	3064	IFT20	90410	3
HTT	3064	IMMT	10989	4
HTT	3064	ING5	84289	3
HTT	3064	IPO4	79711	4
HTT	3064	ITCH	83737	3
HTT	3064	JAKMIP1	152789	3
HTT	3064	KLF11	8462	3
HTT	3064	KPNA3	3839	3
HTT	3064	LANCL1	10314	4
HTT	3064	MAGEA3	4102	3
HTT	3064	MAGEB18	286514	3
HTT	3064	MAGEB6	158809	3
HTT	3064	MAP1LC3B	81631	4
HTT	3064	MATR3	9782	4
HTT	3064	MBD1	4152	3
HTT	3064	MBD4	8930	5
HTT	3064	MED15	51586	3
HTT	3064	MED31	51003	4
HTT	3064	MEOX1	4222	4
HTT	3064	MIPEP	4285	3
HTT	3064	MKRN2	23609	3
HTT	3064	MRFAP1	93621	3
HTT	3064	MRFAP1L1	114932	4
HTT	3064	MTUS1	57509	3
HTT	3064	NBR1	4077	3
HTT	3064	NCOR1	9611	3
HTT	3064	NDUFA13	51079	4
HTT	3064	NDUFA9	4704	4
HTT	3064	NDUFB10	4716	4
HTT	3064	NDUFB9	4715	4
HTT	3064	NDUFS1	4719	4
HTT	3064	NDUFS5	4725	4
HTT	3064	NEUROD1	4760	4
HTT	3064	NFKB1	4790	3
HTT	3064	NME4	4833	5
HTT	3064	NPTN	27020	4
HTT	3064	NUP58	9818	4
HTT	3064	NXT2	55916	3
HTT	3064	OPTN	10133	8
HTT	3064	OSTF1	26578	3
HTT	3064	PACSIN1	29993	5
HTT	3064	PDK2	5164	3
HTT	3064	PFN2	5217	4
HTT	3064	PIAS1	8554	3
HTT	3064	PIAS4	51588	4
HTT	3064	PIK3R1	5295	4
HTT	3064	PIK3R3	8503	3
HTT	3064	PKM	5315	3
HTT	3064	PLEC	5339	4
HTT	3064	PPA2	27068	3
HTT	3064	PPARG	5468	3
HTT	3064	PPIH	10465	4
HTT	3064	PPL	5493	3
HTT	3064	PPP1CA	5499	4
HTT	3064	PRMT2	3275	5
HTT	3064	PRNP	5621	4
HTT	3064	PRPF40A	55660	8
HTT	3064	PRPF40B	25766	3
HTT	3064	PRRC1	133619	4
HTT	3064	PSMA4	5685	4
HTT	3064	PSMA6	5687	4
HTT	3064	PSMA7	5688	4
HTT	3064	PSMB1	5689	4
HTT	3064	PSMB2	5690	4
HTT	3064	PSMB7	5695	3
HTT	3064	PSMC5	5705	3
HTT	3064	PSMD14	10213	4
HTT	3064	PSMD4	5710	3
HTT	3064	PSMD7	5713	4
HTT	3064	PTGES2	80142	3
HTT	3064	PTK6	5753	3
HTT	3064	RAE1	8480	4
HTT	3064	RANGAP1	5905	4
HTT	3064	RASA1	5921	5
HTT	3064	RHEB	6009	3
HTT	3064	RNF20	56254	4
HTT	3064	RNF40	9810	3
HTT	3064	RPL13	6137	4
HTT	3064	RPL4	6124	5
HTT	3064	SEC13	6396	4
HTT	3064	SEPTIN7	989	4
HTT	3064	SETD2	29072	4
HTT	3064	SH3GL3	6457	8
HTT	3064	SIN3A	25942	4
HTT	3064	SNAP25	6616	4
HTT	3064	SNCA	6622	4
HTT	3064	SP1	6667	5
HTT	3064	SP3	6670	3
HTT	3064	SQSTM1	8878	5
HTT	3064	SRRT	51593	3
HTT	3064	ST13	6767	4
HTT	3064	STRAP	11171	4
HTT	3064	STXBP1	6812	4
HTT	3064	SYP	6855	4
HTT	3064	SYT2	127833	4
HTT	3064	SYVN1	84447	3
HTT	3064	TACC1	6867	4
HTT	3064	TAF4	6874	3
HTT	3064	TANK	10010	3
HTT	3064	TCERG1	10915	5
HTT	3064	TP53	7157	6
HTT	3064	TRAFD1	10906	3
HTT	3064	TRIP10	9322	4
HTT	3064	TTC23	64927	3
HTT	3064	TUBA1A	7846	4
HTT	3064	TUBB	203068	5
HTT	3064	TXNDC11	51061	3
HTT	3064	UBAC1	10422	4
HTT	3064	UBE2K	3093	7
HTT	3064	UBQLN2	29978	4
HTT	3064	UFD1	7353	4
HTT	3064	UPF3A	65110	3
HTT	3064	UTP14A	10813	3
HTT	3064	VCP	7415	8
HTT	3064	VDAC2	7417	4
HTT	3064	VIM	7431	4
HTT	3064	VPS28	51160	4
HTT	3064	WAC	51322	3
HTT	3064	WDFY3	23001	3
HTT	3064	WDR61	80349	4
HTT	3064	WDR91	29062	3
HTT	3064	XAGE3	170626	4
HTT	3064	XRCC6	2547	4
HTT	3064	YWHAB	7529	3
HTT	3064	ZBTB16	7704	3
HTT	3064	ZDHHC17	23390	10
HTT	3064	ZFYVE19	84936	4
HTT	3064	ZMAT2	153527	5
HTT	3064	ZNF655	79027	4
LRRK2	120892	ABCE1	6059	4
LRRK2	120892	ACIN1	22985	3
LRRK2	120892	ACTB	60	3
LRRK2	120892	ACTG1	71	5
LRRK2	120892	ACTR2	10097	3
LRRK2	120892	ADRM1	11047	3
LRRK2	120892	AGO1	26523	3
LRRK2	120892	AGO2	27161	3
LRRK2	120892	AHCYL1	10768	4
LRRK2	120892	AIFM1	9131	4
LRRK2	120892	AKT1	207	3
LRRK2	120892	ANKS4B	257629	3
LRRK2	120892	AP3B1	8546	4
LRRK2	120892	ARFGAP1	55738	7
LRRK2	120892	ARHGEF7	8874	5
LRRK2	120892	ARPC1B	10095	3
LRRK2	120892	ARPC2	10109	3
LRRK2	120892	ATP5MG	10632	3
LRRK2	120892	ATP5PO	539	4
LRRK2	120892	BAG2	9532	3
LRRK2	120892	BAG5	9529	7
LRRK2	120892	CBLB	868	4
LRRK2	120892	CBX3	11335	3
LRRK2	120892	CCT3	7203	4
LRRK2	120892	CDC37	11140	8
LRRK2	120892	CDC42	998	5
LRRK2	120892	CDC42EP3	10602	3
LRRK2	120892	CFAP20	29105	4
LRRK2	120892	CHD1L	9557	3
LRRK2	120892	CHGB	1114	4
LRRK2	120892	CKAP5	9793	4
LRRK2	120892	CNP	1267	4
LRRK2	120892	COPG2	26958	4
LRRK2	120892	COQ8A	56997	4
LRRK2	120892	CSE1L	1434	3
LRRK2	120892	CSNK1A1	1452	3
LRRK2	120892	CSNK1D	1453	4
LRRK2	120892	CUEDC1	404093	3
LRRK2	120892	CYFIP1	23191	4
LRRK2	120892	DDB1	1642	4
LRRK2	120892	DFFA	1676	3
LRRK2	120892	DIAPH1	1729	4
LRRK2	120892	DIS3	22894	4
LRRK2	120892	DNAJA1	3301	5
LRRK2	120892	DNM1	1759	4
LRRK2	120892	DNM1L	10059	9
LRRK2	120892	DVL1	1855	4
LRRK2	120892	DVL2	1856	4
LRRK2	120892	DVL3	1857	4
LRRK2	120892	DYNC1H1	1778	3
LRRK2	120892	ECHS1	1892	5
LRRK2	120892	EEF1A2	1917	4
LRRK2	120892	EEF1G	1937	4
LRRK2	120892	EEF2	1938	4
LRRK2	120892	EIF4EBP1	1978	3
LRRK2	120892	EMD	2010	3
LRRK2	120892	EPRS1	2058	3
LRRK2	120892	GAK	2580	6
LRRK2	120892	GNAI2	2771	3
LRRK2	120892	GSK3B	2932	4
LRRK2	120892	HACD3	51495	4
LRRK2	120892	HSP90AA1	3320	14
LRRK2	120892	HSP90AB1	3326	6
LRRK2	120892	HSPA4	3308	3
LRRK2	120892	HSPA8	3312	8
LRRK2	120892	HSPA9	3313	3
LRRK2	120892	KHSRP	8570	4
LRRK2	120892	KIF2A	3796	4
LRRK2	120892	KPNB1	3837	4
LRRK2	120892	LAMP2	3920	3
LRRK2	120892	LARP4	113251	4
LRRK2	120892	LARP7	51574	4
LRRK2	120892	LAS1L	81887	4
LRRK2	120892	LDHA	3939	4
LRRK2	120892	LDHB	3945	3
LRRK2	120892	LGALS8	3964	3
LRRK2	120892	LMNB1	4001	3
LRRK2	120892	LMNB2	84823	3
LRRK2	120892	LRP6	4040	5
LRRK2	120892	LRRC47	57470	4
LRRK2	120892	LRRK1	79705	3
LRRK2	120892	LRRK2	120892	47
LRRK2	120892	MAP1B	4131	7
LRRK2	120892	MAP2K3	5606	5
LRRK2	120892	MAP2K6	5608	5
LRRK2	120892	MAP2K7	5609	4
LRRK2	120892	MAPT	4137	5
LRRK2	120892	MATK	4145	3
LRRK2	120892	MBP	4155	7
LRRK2	120892	MDN1	23195	3
LRRK2	120892	MFN2	9927	3
LRRK2	120892	MMS19	64210	4
LRRK2	120892	MOGS	7841	4
LRRK2	120892	MRPL19	9801	4
LRRK2	120892	MSH2	4436	4
LRRK2	120892	MSN	4478	13
LRRK2	120892	MTHFD2	10797	4
LRRK2	120892	MYL6	4637	4
LRRK2	120892	MYL9	10398	4
LRRK2	120892	MYO1B	4430	5
LRRK2	120892	MYO1C	4641	5
LRRK2	120892	MYO1D	4642	4
LRRK2	120892	NCL	4691	5
LRRK2	120892	NCLN	56926	4
LRRK2	120892	NDUFAF7	55471	3
LRRK2	120892	NEK1	4750	3
LRRK2	120892	NUP107	57122	4
LRRK2	120892	NUP133	55746	6
LRRK2	120892	NUP160	23279	4
LRRK2	120892	OPA1	4976	4
LRRK2	120892	PAK6	56924	3
LRRK2	120892	PCNA	5111	4
LRRK2	120892	PFKP	5214	4
LRRK2	120892	PKM	5315	4
LRRK2	120892	PLEC	5339	3
LRRK2	120892	PPP1CA	5499	5
LRRK2	120892	PPP1R8	5511	4
LRRK2	120892	PPP2R2A	5520	4
LRRK2	120892	PRDX3	10935	7
LRRK2	120892	PRKACA	5566	4
LRRK2	120892	PRKDC	5591	4
LRRK2	120892	PRPF6	24148	4
LRRK2	120892	PSMD11	5717	3
LRRK2	120892	PSMD2	5708	4
LRRK2	120892	PSMD6	9861	4
LRRK2	120892	PTCD3	55037	4
LRRK2	120892	PYGB	5834	4
LRRK2	120892	RAB10	10890	4
LRRK2	120892	RAB1B	81876	4
LRRK2	120892	RAB29	8934	7
LRRK2	120892	RAB32	10981	7
LRRK2	120892	RAB38	23682	3
LRRK2	120892	RAB5B	5869	8
LRRK2	120892	RAB8A	4218	4
LRRK2	120892	RAC1	5879	3
LRRK2	120892	RANBP2	5903	3
LRRK2	120892	RBBP7	5931	3
LRRK2	120892	RBM39	9584	4
LRRK2	120892	RGS2	5997	4
LRRK2	120892	RIF1	55183	3
LRRK2	120892	RO60	6738	4
LRRK2	120892	RPL10A	4736	5
LRRK2	120892	RPL11	6135	4
LRRK2	120892	RPL12	6136	4
LRRK2	120892	RPL13	6137	5
LRRK2	120892	RPL14	9045	3
LRRK2	120892	RPL19	6143	4
LRRK2	120892	RPL23	9349	4
LRRK2	120892	RPL23A	6147	3
LRRK2	120892	RPL24	6152	4
LRRK2	120892	RPL3	6122	4
LRRK2	120892	RPL30	6156	4
LRRK2	120892	RPL34	6164	4
LRRK2	120892	RPS11	6205	5
LRRK2	120892	RPS13	6207	4
LRRK2	120892	RPS14	6208	4
LRRK2	120892	RPS15	6209	6
LRRK2	120892	RPS15A	6210	4
LRRK2	120892	RPS16	6217	5
LRRK2	120892	RPS18	6222	4
LRRK2	120892	RPS2	6187	5
LRRK2	120892	RPS20	6224	6
LRRK2	120892	RPS23	6228	3
LRRK2	120892	RPS27	6232	5
LRRK2	120892	RPS3	6188	5
LRRK2	120892	RPS3A	6189	4
LRRK2	120892	RPS7	6201	4
LRRK2	120892	RPS8	6202	4
LRRK2	120892	RUVBL2	10856	3
LRRK2	120892	SAMHD1	25939	4
LRRK2	120892	SEC16A	9919	4
LRRK2	120892	SENP3	26168	4
LRRK2	120892	SF3B2	10992	4
LRRK2	120892	SF3B3	23450	4
LRRK2	120892	SFN	2810	6
LRRK2	120892	SFXN1	94081	4
LRRK2	120892	SH3GL1	6455	4
LRRK2	120892	SH3GL2	6456	3
LRRK2	120892	SLC25A11	8402	4
LRRK2	120892	SLC25A22	79751	4
LRRK2	120892	SLC25A4	291	4
LRRK2	120892	SLC25A5	292	4
LRRK2	120892	SLC25A6	293	4
LRRK2	120892	SNAPIN	23557	5
LRRK2	120892	SNCA	6622	4
LRRK2	120892	SPTLC1	10558	4
LRRK2	120892	SQSTM1	8878	7
LRRK2	120892	SSR4	6748	4
LRRK2	120892	STUB1	10273	7
LRRK2	120892	TCF25	22980	4
LRRK2	120892	TP53	7157	5
LRRK2	120892	TPR	7175	3
LRRK2	120892	TTC27	55622	4
LRRK2	120892	TUBA1A	7846	7
LRRK2	120892	TUBA1C	84790	5
LRRK2	120892	TUBB	203068	9
LRRK2	120892	TUBB2A	7280	4
LRRK2	120892	TUBB3	10381	3
LRRK2	120892	TUBB4A	10382	5
LRRK2	120892	TUBB4B	10383	4
LRRK2	120892	TUBB6	84617	4
LRRK2	120892	TUBG1	7283	4
LRRK2	120892	TUFM	7284	4
LRRK2	120892	USP39	10713	4
LRRK2	120892	VDAC1	7416	3
LRRK2	120892	VIM	7431	3
LRRK2	120892	VPS4A	27183	4
LRRK2	120892	WSB1	26118	5
LRRK2	120892	YWHAB	7529	6
LRRK2	120892	YWHAE	7531	7
LRRK2	120892	YWHAG	7532	8
LRRK2	120892	YWHAH	7533	5
LRRK2	120892	YWHAQ	10971	10
LRRK2	120892	YWHAZ	7534	11
LRRK2	120892	ZRANB2	9406	4
MAPT	4137	AATF	26574	3
MAPT	4137	ABL1	25	4
MAPT	4137	ACTB	60	4
MAPT	4137	AKT1	207	3
MAPT	4137	ANXA2	302	4
MAPT	4137	AP2M1	1173	3
MAPT	4137	APOE	348	8
MAPT	4137	APP	351	6
MAPT	4137	BAG1	573	3
MAPT	4137	BAIAP2	10458	3
MAPT	4137	BIN1	274	8
MAPT	4137	CCT5	22948	3
MAPT	4137	CDK5	1020	6
MAPT	4137	CSNK1A1	1452	3
MAPT	4137	CSNK1D	1453	3
MAPT	4137	DCTN1	1639	10
MAPT	4137	DCTN2	10540	4
MAPT	4137	DDX6	1656	6
MAPT	4137	DENR	8562	3
MAPT	4137	DGUOK	1716	3
MAPT	4137	DNAAF2	55172	3
MAPT	4137	EEF1A1	1915	3
MAPT	4137	EEF1A2	1917	3
MAPT	4137	EGFR	1956	5
MAPT	4137	EWSR1	2130	4
MAPT	4137	FKBP5	2289	6
MAPT	4137	FYN	2534	9
MAPT	4137	GSK3A	2931	4
MAPT	4137	GSK3B	2932	19
MAPT	4137	HAX1	10456	3
MAPT	4137	HDAC6	10013	3
MAPT	4137	HNRNPD	3184	4
MAPT	4137	HNRNPR	10236	4
MAPT	4137	HSP90AB1	3326	8
MAPT	4137	HSPA1A	3303	6
MAPT	4137	HSPA4	3308	5
MAPT	4137	HSPA8	3312	8
MAPT	4137	LRRK2	120892	5
MAPT	4137	MAPRE1	22919	4
MAPT	4137	MAPRE3	22924	3
MAPT	4137	MAPT	4137	5
MAPT	4137	MARCHF7	64844	4
MAPT	4137	MARK1	4139	6
MAPT	4137	MARK2	2011	8
MAPT	4137	MARK3	4140	3
MAPT	4137	MARK4	57787	5
MAPT	4137	MSI1	4440	3
MAPT	4137	MSI2	124540	3
MAPT	4137	NPTX1	4884	3
MAPT	4137	NUFIP1	26747	3
MAPT	4137	P4HB	5034	4
MAPT	4137	PIK3R1	5295	3
MAPT	4137	PIN1	5300	4
MAPT	4137	PRKACA	5566	7
MAPT	4137	PRKN	5071	5
MAPT	4137	PSMC2	5701	3
MAPT	4137	PSMD2	5708	4
MAPT	4137	RPL28	6158	3
MAPT	4137	RPLP0	6175	3
MAPT	4137	RPS6KB1	6198	4
MAPT	4137	S100B	6285	3
MAPT	4137	SFN	2810	5
MAPT	4137	SGK1	6446	3
MAPT	4137	SIRT1	23411	3
MAPT	4137	SLC1A2	6506	3
MAPT	4137	SNCA	6622	11
MAPT	4137	SPTAN1	6709	3
MAPT	4137	SQSTM1	8878	4
MAPT	4137	SRC	6714	3
MAPT	4137	SRP14	6727	3
MAPT	4137	STAU1	6780	5
MAPT	4137	STUB1	10273	14
MAPT	4137	SYK	6850	3
MAPT	4137	SYNCRIP	10492	3
MAPT	4137	TUBA1A	7846	7
MAPT	4137	TUBA4A	7277	6
MAPT	4137	TUBB3	10381	6
MAPT	4137	UBASH3B	84959	3
MAPT	4137	YWHAB	7529	5
MAPT	4137	YWHAE	7531	4
MAPT	4137	YWHAG	7532	4
MAPT	4137	YWHAH	7533	3
MAPT	4137	YWHAQ	10971	5
MAPT	4137	YWHAZ	7534	13
PPP2R2B	5521	ACACA	31	3
PPP2R2B	5521	ACLY	47	3
PPP2R2B	5521	ATXN2L	11273	3
PPP2R2B	5521	BAG2	9532	3
PPP2R2B	5521	CAPZA1	829	4
PPP2R2B	5521	CAPZB	832	3
PPP2R2B	5521	CCAR2	57805	3
PPP2R2B	5521	CCT2	10576	5
PPP2R2B	5521	CCT3	7203	5
PPP2R2B	5521	CCT4	10575	5
PPP2R2B	5521	CCT5	22948	5
PPP2R2B	5521	CCT6A	908	5
PPP2R2B	5521	CCT7	10574	5
PPP2R2B	5521	CCT8	10694	3
PPP2R2B	5521	CDCA4	55038	5
PPP2R2B	5521	DBN1	1627	3
PPP2R2B	5521	DCD	117159	3
PPP2R2B	5521	DDX17	10521	3
PPP2R2B	5521	DDX3X	1654	3
PPP2R2B	5521	DSP	1832	3
PPP2R2B	5521	FAM122A	116224	4
PPP2R2B	5521	H1-4	3008	3
PPP2R2B	5521	HCFC1	3054	3
PPP2R2B	5521	HNRNPK	3190	3
PPP2R2B	5521	HNRNPU	3192	3
PPP2R2B	5521	HSPA5	3309	3
PPP2R2B	5521	HSPA8	3312	3
PPP2R2B	5521	HSPA9	3313	3
PPP2R2B	5521	IER5	51278	4
PPP2R2B	5521	IQGAP1	8826	3
PPP2R2B	5521	IRS4	8471	3
PPP2R2B	5521	JUN	3725	3
PPP2R2B	5521	JUP	3728	3
PPP2R2B	5521	KLHL15	80311	3
PPP2R2B	5521	KRT1	3848	3
PPP2R2B	5521	KRT10	3858	3
PPP2R2B	5521	KRT14	3861	3
PPP2R2B	5521	KRT16	3868	3
PPP2R2B	5521	KRT2	3849	3
PPP2R2B	5521	KRT5	3852	3
PPP2R2B	5521	KRT6B	3854	3
PPP2R2B	5521	KRT9	3857	3
PPP2R2B	5521	MAP7	9053	3
PPP2R2B	5521	MCCC2	64087	3
PPP2R2B	5521	MRPS27	23107	3
PPP2R2B	5521	MRPS34	65993	3
PPP2R2B	5521	MTCL1	23255	5
PPP2R2B	5521	MTREX	23517	4
PPP2R2B	5521	MYL6	4637	3
PPP2R2B	5521	MYO9A	4649	4
PPP2R2B	5521	PC	5091	3
PPP2R2B	5521	PPME1	51400	3
PPP2R2B	5521	PPP2CA	5515	6
PPP2R2B	5521	PPP2CB	5516	7
PPP2R2B	5521	PPP2R1A	5518	12
PPP2R2B	5521	PPP2R1B	5519	5
PPP2R2B	5521	PPP2R2C	5522	4
PPP2R2B	5521	PPP4C	5531	5
PPP2R2B	5521	PRDX1	5052	3
PPP2R2B	5521	RBM7	10179	3
PPP2R2B	5521	RECQL4	9401	3
PPP2R2B	5521	RPL17	6139	3
PPP2R2B	5521	RPL23	9349	3
PPP2R2B	5521	RPL24	6152	3
PPP2R2B	5521	RPS11	6205	3
PPP2R2B	5521	RPS14	6208	3
PPP2R2B	5521	RPS4X	6191	3
PPP2R2B	5521	RPS6	6194	3
PPP2R2B	5521	S100A7	6278	3
PPP2R2B	5521	S100A8	6279	3
PPP2R2B	5521	S100A9	6280	3
PPP2R2B	5521	SERTAD4	56256	3
PPP2R2B	5521	SIK2	23235	3
PPP2R2B	5521	SKA1	220134	5
PPP2R2B	5521	SKA2	348235	3
PPP2R2B	5521	SKA3	221150	5
PPP2R2B	5521	SUGP2	10147	3
PPP2R2B	5521	TCP1	6950	5
PPP2R2B	5521	TRIM28	10155	3
PPP2R2B	5521	TUBB	203068	3
PPP2R2B	5521	TUBB4B	10383	3
PPP2R2B	5521	TUFM	7284	3
PPP2R2B	5521	ZC3HAV1	56829	3
PPP2R2B	5521	ZCCHC8	55596	4
SETD1A	9739	ASH2L	9070	12
SETD1A	9739	CREBBP	1387	3
SETD1A	9739	CXXC1	30827	15
SETD1A	9739	DPY30	84661	5
SETD1A	9739	EDA	1896	3
SETD1A	9739	EP300	2033	3
SETD1A	9739	HCFC1	3054	3
SETD1A	9739	MYB	4602	4
SETD1A	9739	NUP50	10762	3
SETD1A	9739	OGT	8473	3
SETD1A	9739	PRMT2	3275	3
SETD1A	9739	RBBP5	5929	13
SETD1A	9739	TP53	7157	3
SETD1A	9739	USF1	7391	3
SETD1A	9739	WDR5	11091	14
SETD1A	9739	WDR82	80335	7
SGF29	112869	ATXN7	6314	5
SGF29	112869	ATXN7L2	127002	4
SGF29	112869	ATXN7L3	56970	6
SGF29	112869	BANP	54971	3
SGF29	112869	C1orf122	127687	3
SGF29	112869	CATSPER4	378807	3
SGF29	112869	CEP250	11190	3
SGF29	112869	DR1	1810	7
SGF29	112869	DTNA	1837	3
SGF29	112869	DTNB	1838	3
SGF29	112869	EDC4	23644	6
SGF29	112869	FAAP100	80233	3
SGF29	112869	FYCO1	79443	3
SGF29	112869	ITPRID2	6744	3
SGF29	112869	KAT14	57325	7
SGF29	112869	KAT2A	2648	9
SGF29	112869	KAT2B	8850	6
SGF29	112869	KIF2C	11004	3
SGF29	112869	KIF5B	3799	3
SGF29	112869	KNSTRN	90417	5
SGF29	112869	KRT15	3866	5
SGF29	112869	MBIP	51562	8
SGF29	112869	MPRIP	23164	3
SGF29	112869	NDC80	10403	4
SGF29	112869	RAB11FIP5	26056	3
SGF29	112869	RABGAP1L	9910	3
SGF29	112869	REPS1	85021	3
SGF29	112869	RINT1	60561	4
SGF29	112869	SH3GL1	6455	3
SGF29	112869	SNAP29	9342	3
SGF29	112869	SPC24	147841	3
SGF29	112869	SUPT20H	55578	7
SGF29	112869	SUPT3H	8464	8
SGF29	112869	SUPT7L	9913	7
SGF29	112869	TADA1	117143	7
SGF29	112869	TADA2A	6871	8
SGF29	112869	TADA2B	93624	7
SGF29	112869	TADA3	10474	14
SGF29	112869	TAF10	6881	4
SGF29	112869	TAF12	6883	4
SGF29	112869	TAF5L	27097	7
SGF29	112869	TAF6L	10629	5
SGF29	112869	TAF9B	51616	5
SGF29	112869	TCF12	6938	3
SGF29	112869	TCF4	6925	8
SGF29	112869	TFPT	29844	3
SGF29	112869	TP53BP2	7159	3
SGF29	112869	TRRAP	8295	6
SGF29	112869	USP22	23326	3
SGF29	112869	WDR37	22884	5
SGF29	112869	WDR5	11091	8
SGF29	112869	YEATS2	55689	8
SGF29	112869	ZZZ3	26009	8
UBTF	7343	CSNK2A1	1457	3
UBTF	7343	CTDSP2	10106	3
UBTF	7343	EDA	1896	3
UBTF	7343	ESR1	2099	3
UBTF	7343	HDAC1	3065	4
UBTF	7343	IRS1	3667	3
UBTF	7343	KAT5	10524	5
UBTF	7343	MYBBP1A	10514	5
UBTF	7343	MYC	4609	4
UBTF	7343	POLR1A	25885	4
UBTF	7343	PTGER3	5733	3
UBTF	7343	RB1	5925	4
UBTF	7343	RUNX2	860	3
UBTF	7343	SET	6418	4
UBTF	7343	SIRT7	51547	5
UBTF	7343	TAF1	6872	3
UBTF	7343	TAF1C	9013	3
UBTF	7343	TAF1D	79101	3
UBTF	7343	VTI1B	10490	3
VPS35	55737	APP	351	4
VPS35	55737	ATG9A	79065	3
VPS35	55737	FKBP15	23307	4
VPS35	55737	FN1	2335	3
VPS35	55737	MCM7	4176	3
VPS35	55737	MRM1	79922	3
VPS35	55737	MTNR1B	4544	3
VPS35	55737	RIOK2	55781	3
VPS35	55737	SNX1	6642	5
VPS35	55737	SNX2	6643	6
VPS35	55737	SNX3	8724	5
VPS35	55737	TBC1D5	9779	4
VPS35	55737	TTC4	7268	3
VPS35	55737	UPF1	5976	3
VPS35	55737	USP48	84196	3
VPS35	55737	VPS26A	9559	19
VPS35	55737	VPS26B	112936	10
VPS35	55737	VPS29	51699	19
VPS35	55737	WASHC2A	387680	3
VPS35	55737	WASHC2C	253725	4
WDR5B	54554	ATP13A2	23400	3
