# Supplementary material for: Protein network analysis links the NSL complex to Parkinson’s disease via mitochondrial and nuclear biology
Source: Royal Society of Chemistry journal article supplement (doi:10.1039/d2mo00325b), 2023-06-14
Supplement: d2mo00325b9.xlsx [file d2mo00325b9.xlsx]

## Sheet: Supplementary Table 8
	Gene Name	Entrez ID	n
	ACTB	60	2
	ACTG1	71	2
	AKT1	207	4
	APP	351	2
	CCT6A	908	2
	CNP	1267	2
	CREBBP	1387	2
	CSNK1A1	1452	2
	CSNK1D	1453	2
	DDB1	1642	2
	DYNC1H1	1778	2
	ECHS1	1892	2
	EDA	1896	2
	EEF1A2	1917	2
	EGFR	1956	2
	EWSR1	2130	2
	SFN	2810	2
	GSK3B	2932	2
	HCFC1	3054	2
	PRMT2	3275	2
	DNAJA1	3301	2
	HSPA4	3308	2
	HSPA8	3312	5
	HSPA9	3313	2
	HSP90AB1	3326	2
	MAPT	4137	2
	MYC	4609	3
	MYL6	4637	2
	PIK3R1	5295	2
	PKM	5315	2
	PLEC	5339	2
	PPP1CA	5499	2
	PPP2R2A	5520	2
	PRKACA	5566	2
	PSMD2	5708	2
	RPL13	6137	2
	RPL24	6152	2
	RPS11	6205	2
	RPS14	6208	2
	SH3GL1	6455	2
	SNCA	6622	3
	TP53	7157	4
	CCT3	7203	2
	TUFM	7284	2
	VIM	7431	2
	YWHAB	7529	4
	YWHAE	7531	2
	YWHAG	7532	2
	YWHAH	7533	2
	YWHAZ	7534	2
	TUBA1A	7846	5
	OGT	8473	2
	SQSTM1	8878	3
	RPL23	9349	2
	BAG2	9532	2
	HDAC6	10013	2
	OPTN	10133	2
	STUB1	10273	2
	TUBB3	10381	3
	TUBB4B	10383	2
	HAX1	10456	2
	BAIAP2	10458	3
	DCTN2	10540	2
	CCT8	10694	2
	YWHAQ	10971	2
	WDR5	11091	3
	MAPRE1	22919	2
	CCT5	22948	2
	SIRT1	23411	2
	AGO2	27161	2
	BANP	54971	2
	ITCH	83737	3
	LRRK2	120892	2
	TUBB	203068	3
