# Supplementary material for: Protein network analysis links the NSL complex to Parkinson’s disease via mitochondrial and nuclear biology
Source: Royal Society of Chemistry journal article supplement (doi:10.1039/d2mo00325b), 2023-06-14
Supplement: d2mo00325b10.xlsx [file d2mo00325b10.xlsx]

## Sheet: gProfiler_hsapiens
Key : removed terms	source	term_name	term_id	highlighted	adjusted_p_value	negative_log10_of_adjusted_p_value	term_size	query_size	intersection_size	effective_domain_size	intersections
general terms	GO:BP	regulation of norepinephrine uptake	GO:0051621	FALSE	0.0302439	1.51936	2	81	2	21128	ACTB,SNCA
term size >100	GO:BP	negative regulation of late endosome to lysosome transport	GO:1902823	TRUE	0.0302439	1.51936	2	81	2	21128	LRRK2,VPS35
	GO:BP	negative regulation of vacuolar transport	GO:1903336	FALSE	0.0302439	1.51936	2	81	2	21128	LRRK2,VPS35
	GO:BP	negative regulation of establishment of protein localization to mitochondrion	GO:1903748	FALSE	0.00624619	2.20438	8	81	3	21128	DNAJA1,LRRK2,MAPT
	GO:BP	positive regulation of establishment of protein localization to telomere	GO:1904851	FALSE	8.617e-05	4.06464	10	81	4	21128	CCT3,CCT5,CCT6A,CCT8
	GO:BP	positive regulation of protein localization to Cajal body	GO:1904871	FALSE	0.000135015	3.86962	11	81	4	21128	CCT3,CCT5,CCT6A,CCT8
	GO:BP	regulation of protein localization to Cajal body	GO:1904869	FALSE	0.000135015	3.86962	11	81	4	21128	CCT3,CCT5,CCT6A,CCT8
	GO:BP	regulation of establishment of protein localization to telomere	GO:0070203	FALSE	0.000135015	3.86962	11	81	4	21128	CCT3,CCT5,CCT6A,CCT8
	GO:BP	protein localization to Cajal body	GO:1904867	FALSE	0.000201933	3.69479	12	81	4	21128	CCT3,CCT5,CCT6A,CCT8
	GO:BP	regulation of establishment of protein localization to chromosome	GO:0070202	FALSE	0.000201933	3.69479	12	81	4	21128	CCT3,CCT5,CCT6A,CCT8
	GO:BP	protein localization to nuclear body	GO:1903405	FALSE	0.000201933	3.69479	12	81	4	21128	CCT3,CCT5,CCT6A,CCT8
	GO:BP	positive regulation of protein localization to chromosome, telomeric region	GO:1904816	FALSE	0.000290831	3.53636	13	81	4	21128	CCT3,CCT5,CCT6A,CCT8
	GO:BP	protein localization to nucleoplasm	GO:1990173	FALSE	0.000405977	3.3915	14	81	4	21128	CCT3,CCT5,CCT6A,CCT8
	GO:BP	positive regulation of telomerase RNA localization to Cajal body	GO:1904874	FALSE	0.000551991	3.25807	15	81	4	21128	CCT3,CCT5,CCT6A,CCT8
	GO:BP	regulation of protein localization to chromosome, telomeric region	GO:1904814	FALSE	0.000551991	3.25807	15	81	4	21128	CCT3,CCT5,CCT6A,CCT8
	GO:BP	chaperone-mediated autophagy	GO:0061684	FALSE	0.000733844	3.1344	16	81	4	21128	EEF1A2,HSPA8,SNCA,STUB1
	GO:BP	establishment of protein localization to telomere	GO:0070200	FALSE	0.000956847	3.01916	17	81	4	21128	CCT3,CCT5,CCT6A,CCT8
	GO:BP	regulation of cellular response to heat	GO:1900034	FALSE	0.000956847	3.01916	17	81	4	21128	CREBBP,GSK3B,MAPT,SIRT1
	GO:BP	positive regulation of protein export from nucleus	GO:0046827	FALSE	0.00122665	2.91128	18	81	4	21128	GSK3B,PRKACA,SFN,YWHAE
	GO:BP	regulation of telomerase RNA localization to Cajal body	GO:1904872	FALSE	0.00122665	2.91128	18	81	4	21128	CCT3,CCT5,CCT6A,CCT8
	GO:BP	telomerase RNA localization	GO:0090672	FALSE	0.00154923	2.80988	19	81	4	21128	CCT3,CCT5,CCT6A,CCT8
	GO:BP	RNA localization to nucleus	GO:0090685	FALSE	0.00154923	2.80988	19	81	4	21128	CCT3,CCT5,CCT6A,CCT8
	GO:BP	RNA localization to Cajal body	GO:0090670	FALSE	0.00154923	2.80988	19	81	4	21128	CCT3,CCT5,CCT6A,CCT8
	GO:BP	telomerase RNA localization to Cajal body	GO:0090671	FALSE	0.00154923	2.80988	19	81	4	21128	CCT3,CCT5,CCT6A,CCT8
	GO:BP	negative regulation of protein acetylation	GO:1901984	FALSE	0.00585475	2.23249	26	81	4	21128	GSK3B,HDAC6,SIRT1,SNCA
	GO:BP	establishment of protein localization to chromosome	GO:0070199	FALSE	0.000115032	3.93918	27	81	5	21128	CCT3,CCT5,CCT6A,CCT8,SGF29
	GO:BP	protein localization to chromosome, telomeric region	GO:0070198	FALSE	0.0121441	1.91563	31	81	4	21128	CCT3,CCT5,CCT6A,CCT8
	GO:BP	protein localization to centrosome	GO:0071539	TRUE	0.0138386	1.85891	32	81	4	21128	CSNK1D,DCTN2,GSK3B,MAPRE1
	GO:BP	regulation of protein export from nucleus	GO:0046825	FALSE	0.0138386	1.85891	32	81	4	21128	GSK3B,PRKACA,SFN,YWHAE
	GO:BP	positive regulation of protein deacetylation	GO:0090312	FALSE	0.0138386	1.85891	32	81	4	21128	HDAC6,LRRK2,SIRT1,TP53
	GO:BP	protein localization to microtubule organizing center	GO:1905508	FALSE	0.0177433	1.75096	34	81	4	21128	CSNK1D,DCTN2,GSK3B,MAPRE1
	GO:BP	positive regulation of telomere maintenance via telomerase	GO:0032212	FALSE	0.0177433	1.75096	34	81	4	21128	CCT3,CCT5,CCT6A,CCT8
	GO:BP	regulation of autophagy of mitochondrion	GO:1903146	FALSE	0.0250488	1.60121	37	81	4	21128	HAX1,HDAC6,HTT,TP53
	GO:BP	mitophagy	GO:0000423	FALSE	0.0250488	1.60121	37	81	4	21128	HDAC6,OPTN,SQSTM1,TP53
	GO:BP	positive regulation of telomere maintenance via telomere lengthening	GO:1904358	FALSE	0.0250488	1.60121	37	81	4	21128	CCT3,CCT5,CCT6A,CCT8
	GO:BP	toxin transport	GO:1901998	FALSE	0.041838	1.37843	42	81	4	21128	CCT3,CCT5,CCT8,DNAJA1
	GO:BP	regulation of histone deacetylation	GO:0031063	FALSE	0.00147054	2.83252	44	81	5	21128	CAMK2D,LRRK2,SGF29,SIRT1,TP53
	GO:BP	substantia nigra development	GO:0021762	FALSE	0.00205848	2.68645	47	81	5	21128	ACTB,CNP,YWHAE,YWHAH,YWHAQ
	GO:BP	protein destabilization	GO:0031648	FALSE	7.611e-05	4.11856	50	81	6	21128	CREBBP,HDAC6,HTT,SIRT1,SNCA,VPS35
	GO:BP	protein export from nucleus	GO:0006611	FALSE	0.00648111	2.18835	59	81	5	21128	GSK3B,HSPA9,PRKACA,SFN,YWHAE
	GO:BP	positive regulation of nucleocytoplasmic transport	GO:0046824	FALSE	0.000257185	3.58975	61	81	6	21128	GSK3B,HSP90AB1,PIK3R1,PRKACA,SFN,YWHAE
	GO:BP	regulation of protein deacetylation	GO:0090311	FALSE	1.95096e-07	6.70975	62	81	8	21128	CAMK2D,CCAR2,HDAC6,LRRK2,MAPT,SGF29,SIRT1,TP53
	GO:BP	cellular response to heat	GO:0034605	FALSE	2.22787e-07	6.65211	63	81	8	21128	CREBBP,GSK3B,HSP90AB1,MAPT,PRKACA,SIRT1,STUB1,YWHAE
	GO:BP	presynaptic endocytosis	GO:0140238	FALSE	0.0122065	1.91341	67	81	5	21128	ACTB,ACTG1,LRRK2,SH3GL1,SNCA
	GO:BP	synaptic vesicle endocytosis	GO:0048488	FALSE	0.0122065	1.91341	67	81	5	21128	ACTB,ACTG1,LRRK2,SH3GL1,SNCA
	GO:BP	neural nucleus development	GO:0048857	FALSE	0.0131359	1.88154	68	81	5	21128	ACTB,CNP,YWHAE,YWHAH,YWHAQ
	GO:BP	chaperone-mediated protein folding	GO:0061077	FALSE	0.000590897	3.22849	70	81	6	21128	CCT3,CCT5,CCT6A,CCT8,HSPA8,HSPA9
	GO:BP	telomere maintenance via telomerase	GO:0007004	FALSE	0.0162603	1.78887	71	81	5	21128	CCT3,CCT5,CCT6A,CCT8,HSP90AB1
	GO:BP	RNA-templated DNA biosynthetic process	GO:0006278	FALSE	0.0174215	1.75891	72	81	5	21128	CCT3,CCT5,CCT6A,CCT8,HSP90AB1
	GO:BP	positive regulation of DNA biosynthetic process	GO:2000573	FALSE	0.000893757	3.04878	75	81	6	21128	CCT3,CCT5,CCT6A,CCT8,HSP90AB1,MYC
	GO:BP	axo-dendritic transport	GO:0008088	TRUE	0.0227301	1.6434	76	81	5	21128	APP,DYNC1H1,HDAC6,HSPA8,MAPT
	GO:BP	positive regulation of carbohydrate metabolic process	GO:0045913	FALSE	0.0227301	1.6434	76	81	5	21128	AKT1,APP,DDB1,SIRT1,SNCA
	GO:BP	synaptic vesicle recycling	GO:0036465	FALSE	0.0292252	1.53424	80	81	5	21128	ACTB,ACTG1,LRRK2,SH3GL1,SNCA
	GO:BP	negative regulation of protein ubiquitination	GO:0031397	FALSE	0.0349814	1.45616	83	81	5	21128	AKT1,BAG2,DNAJA1,RPL23,SQSTM1
	GO:BP	telomere maintenance via telomere lengthening	GO:0010833	FALSE	0.0370843	1.43081	84	81	5	21128	CCT3,CCT5,CCT6A,CCT8,HSP90AB1
	GO:BP	positive regulation of protein localization to nucleus	GO:1900182	FALSE	8.8892e-05	4.05114	87	81	7	21128	AKT1,CCT3,CCT5,CCT6A,CCT8,HSP90AB1,PIK3R1
	GO:BP	cellular response to UV	GO:0034644	FALSE	0.00231213	2.63599	88	81	6	21128	CREBBP,DDB1,MYC,PIK3R1,SIRT1,TP53
	GO:BP	selective autophagy	GO:0061912	FALSE	0.04912	1.30874	89	81	5	21128	HDAC6,HTT,OPTN,SQSTM1,TP53
	GO:BP	positive regulation of protein binding	GO:0032092	FALSE	0.04912	1.30874	89	81	5	21128	APP,GSK3B,HSP90AB1,LRRK2,MAPRE1
	GO:BP	neuron projection organization	GO:0106027	FALSE	0.00264025	2.57835	90	81	6	21128	APP,BAIAP2,GSK3B,HDAC6,LRRK2,VPS35
	GO:BP	autophagy of mitochondrion	GO:0000422	FALSE	0.003411	2.46712	94	81	6	21128	HAX1,HDAC6,HTT,OPTN,SQSTM1,TP53
	GO:BP	mitochondrion disassembly	GO:0061726	FALSE	0.003411	2.46712	94	81	6	21128	HAX1,HDAC6,HTT,OPTN,SQSTM1,TP53
	GO:BP	midbrain development	GO:0030901	FALSE	0.003411	2.46712	94	81	6	21128	ACTB,CNP,CSNK1D,YWHAE,YWHAH,YWHAQ
	GO:BP	positive regulation of proteasomal ubiquitin-dependent protein catabolic process	GO:0032436	FALSE	0.0036299	2.44011	95	81	6	21128	AKT1,CSNK1A1,CSNK1D,GSK3B,LRRK2,STUB1
	GO:BP	negative regulation of protein binding	GO:0032091	FALSE	0.000164023	3.78509	95	81	7	21128	ACTB,AKT1,BAG2,GSK3B,LRRK2,PPP1CA,STUB1
	GO:BP	regulation of carbohydrate biosynthetic process	GO:0043255	FALSE	0.00386014	2.4134	96	81	6	21128	AKT1,DDB1,GSK3B,PPP1CA,SIRT1,SNCA
	GO:BP	cellular response to catecholamine stimulus	GO:0071870	FALSE	0.00490357	2.30949	100	81	6	21128	APP,GSK3B,LRRK2,PRKACA,SNCA,VPS35
	GO:BP	cellular response to monoamine stimulus	GO:0071868	FALSE	0.00490357	2.30949	100	81	6	21128	APP,GSK3B,LRRK2,PRKACA,SNCA,VPS35
	GO:BP	histone deacetylation	GO:0016575	FALSE	0.00550551	2.2592	102	81	6	21128	CAMK2D,HDAC6,LRRK2,SGF29,SIRT1,TP53
	GO:BP	positive regulation of canonical Wnt signaling pathway	GO:0090263	FALSE	0.00550551	2.2592	102	81	6	21128	CCAR2,CSNK1D,EDA,EGFR,LRRK2,VPS35
	GO:BP	response to catecholamine	GO:0071869	FALSE	0.0058283	2.23446	103	81	6	21128	APP,GSK3B,LRRK2,PRKACA,SNCA,VPS35
	GO:BP	response to monoamine	GO:0071867	FALSE	0.0058283	2.23446	103	81	6	21128	APP,GSK3B,LRRK2,PRKACA,SNCA,VPS35
	GO:BP	apoptotic mitochondrial changes	GO:0008637	FALSE	0.00652022	2.18574	105	81	6	21128	AKT1,CCAR2,GSK3B,SFN,TP53,VPS35
	GO:BP	positive regulation of peptidyl-serine phosphorylation	GO:0033138	FALSE	0.000423697	3.37294	109	81	7	21128	AKT1,APP,EGFR,HAX1,HDAC6,HSP90AB1,SNCA
	GO:BP	regulation of nucleocytoplasmic transport	GO:0046822	FALSE	0.00854673	2.0682	110	81	6	21128	GSK3B,HSP90AB1,PIK3R1,PRKACA,SFN,YWHAE
	GO:BP	response to heat	GO:0009408	FALSE	2.77168e-08	7.55726	110	81	10	21128	AKT1,CREBBP,DNAJA1,GSK3B,HSP90AB1,MAPT,PRKACA,SIRT1,STUB1,YWHAE
	GO:BP	peptidyl-threonine phosphorylation	GO:0018107	FALSE	0.00900769	2.04539	111	81	6	21128	AKT1,APP,CAMK2D,GSK3B,LRRK2,PRKACA
	GO:BP	negative regulation of protein catabolic process	GO:0042177	FALSE	0.00900769	2.04539	111	81	6	21128	BANP,CCAR2,EGFR,HSP90AB1,SNCA,VPS35
	GO:BP	positive regulation of ubiquitin-dependent protein catabolic process	GO:2000060	FALSE	0.00948867	2.02279	112	81	6	21128	AKT1,CSNK1A1,CSNK1D,GSK3B,LRRK2,STUB1
	GO:BP	mitochondrial membrane organization	GO:0007006	FALSE	0.0116262	1.93456	116	81	6	21128	CNP,GSK3B,HSPA4,HSPA9,SNCA,TP53
	GO:BP	cellular response to topologically incorrect protein	GO:0035967	FALSE	0.0134732	1.87053	119	81	6	21128	HDAC6,HSPA8,HSPA9,OPTN,PIK3R1,STUB1
	GO:BP	positive regulation of proteasomal protein catabolic process	GO:1901800	FALSE	0.000772481	3.11211	119	81	7	21128	AKT1,BAG2,CSNK1A1,CSNK1D,GSK3B,LRRK2,STUB1
	GO:BP	peptidyl-threonine modification	GO:0018210	FALSE	0.0141393	1.84957	120	81	6	21128	AKT1,APP,CAMK2D,GSK3B,LRRK2,PRKACA
	GO:BP	establishment of protein localization to mitochondrion	GO:0072655	FALSE	0.0155517	1.80822	122	81	6	21128	AKT1,DNAJA1,HAX1,HSPA4,LRRK2,MAPT
	GO:BP	regulation of circadian rhythm	GO:0042752	FALSE	0.0155517	1.80822	122	81	6	21128	CCAR2,CSNK1D,DDB1,GSK3B,PPP1CA,TP53
	GO:BP	protein deacetylation	GO:0006476	FALSE	4.61917e-05	4.33544	122	81	8	21128	CAMK2D,CCAR2,HDAC6,LRRK2,MAPT,SGF29,SIRT1,TP53
	GO:BP	cellular response to light stimulus	GO:0071482	FALSE	0.0162996	1.78782	123	81	6	21128	CREBBP,DDB1,MYC,PIK3R1,SIRT1,TP53
	GO:BP	excitatory postsynaptic potential	GO:0060079	FALSE	0.0170764	1.7676	124	81	6	21128	AKT1,APP,BAIAP2,GSK3B,LRRK2,SNCA
	GO:BP	regulation of DNA biosynthetic process	GO:2000278	FALSE	0.00107957	2.96675	125	81	7	21128	CCT3,CCT5,CCT6A,CCT8,HSP90AB1,MYC,TP53
	GO:BP	protein localization to mitochondrion	GO:0070585	FALSE	0.0204898	1.68846	128	81	6	21128	AKT1,DNAJA1,HAX1,HSPA4,LRRK2,MAPT
	GO:BP	chemical synaptic transmission, postsynaptic	GO:0099565	FALSE	0.0223926	1.6499	130	81	6	21128	AKT1,APP,BAIAP2,GSK3B,LRRK2,SNCA
	GO:BP	regulation of generation of precursor metabolites and energy	GO:0043467	FALSE	0.0233962	1.63085	131	81	6	21128	AKT1,APP,GSK3B,PPP1CA,SNCA,TP53
	GO:BP	protein deacylation	GO:0035601	FALSE	9.08607e-05	4.04162	133	81	8	21128	CAMK2D,CCAR2,HDAC6,LRRK2,MAPT,SGF29,SIRT1,TP53
	GO:BP	positive regulation of Wnt signaling pathway	GO:0030177	FALSE	0.0314883	1.50185	138	81	6	21128	CCAR2,CSNK1D,EDA,EGFR,LRRK2,VPS35
	GO:BP	positive regulation of proteolysis involved in protein catabolic process	GO:1903052	FALSE	0.00210779	2.67617	138	81	7	21128	AKT1,BAG2,CSNK1A1,CSNK1D,GSK3B,LRRK2,STUB1
	GO:BP	regulation of protein localization to nucleus	GO:1900180	FALSE	0.000121158	3.91665	138	81	8	21128	AKT1,CCT3,CCT5,CCT6A,CCT8,GSK3B,HSP90AB1,PIK3R1
	GO:BP	macromolecule deacylation	GO:0098732	FALSE	0.000121158	3.91665	138	81	8	21128	CAMK2D,CCAR2,HDAC6,LRRK2,MAPT,SGF29,SIRT1,TP53
	GO:BP	response to unfolded protein	GO:0006986	FALSE	0.000128162	3.89224	139	81	8	21128	DNAJA1,HSP90AB1,HSPA4,HSPA8,HSPA9,OPTN,PIK3R1,STUB1
	GO:BP	organelle disassembly	GO:1903008	FALSE	0.0341741	1.4663	140	81	6	21128	HAX1,HDAC6,HTT,OPTN,SQSTM1,TP53
	GO:BP	cellular response to reactive oxygen species	GO:0034614	FALSE	0.0370419	1.43131	142	81	6	21128	AKT1,EGFR,HDAC6,LRRK2,MAPT,SIRT1
	GO:BP	regulation of peptidyl-serine phosphorylation	GO:0033135	FALSE	0.00255439	2.59271	142	81	7	21128	AKT1,APP,EGFR,HAX1,HDAC6,HSP90AB1,SNCA
	GO:BP	regulation of proteasomal ubiquitin-dependent protein catabolic process	GO:0032434	FALSE	0.000151305	3.82015	142	81	8	21128	AKT1,CCAR2,CSNK1A1,CSNK1D,GSK3B,HSP90AB1,LRRK2,STUB1
	GO:BP	regulation of postsynaptic membrane potential	GO:0060078	FALSE	0.041705	1.37981	145	81	6	21128	AKT1,APP,BAIAP2,GSK3B,LRRK2,SNCA
	GO:BP	response to UV	GO:0009411	FALSE	1.12514e-05	4.94879	148	81	9	21128	AKT1,CCAR2,CREBBP,DDB1,EGFR,MYC,PIK3R1,SIRT1,TP53
	GO:BP	regulation of mitochondrion organization	GO:0010821	FALSE	6.5276e-07	6.18525	151	81	10	21128	AKT1,GSK3B,HAX1,HDAC6,HTT,LRRK2,MAPT,SQSTM1,TP53,VPS35
	GO:BP	regulation of cellular carbohydrate metabolic process	GO:0010675	FALSE	0.00402912	2.39479	152	81	7	21128	AKT1,DDB1,GSK3B,PPP1CA,SIRT1,SNCA,TP53
	GO:BP	regulation of microtubule cytoskeleton organization	GO:0070507	FALSE	0.00521506	2.28274	158	81	7	21128	CYLD,DYNC1H1,GSK3B,HDAC6,MAPRE1,MAPT,SNCA
	GO:BP	regulation of macroautophagy	GO:0016241	FALSE	2.22905e-05	4.65188	160	81	9	21128	AKT1,HDAC6,HTT,LRRK2,OPTN,PRKACA,SIRT1,TP53,VPS35
	GO:BP	response to topologically incorrect protein	GO:0035966	FALSE	2.35378e-05	4.62823	161	81	9	21128	DNAJA1,HDAC6,HSP90AB1,HSPA4,HSPA8,HSPA9,OPTN,PIK3R1,STUB1
	GO:BP	negative regulation of binding	GO:0051100	FALSE	0.00615749	2.2106	162	81	7	21128	ACTB,AKT1,BAG2,GSK3B,LRRK2,PPP1CA,STUB1
	GO:BP	protein import into nucleus	GO:0006606	FALSE	0.00695414	2.15776	165	81	7	21128	AKT1,HSP90AB1,LRRK2,PIK3R1,RPL23,SQSTM1,TP53
	GO:BP	postsynapse organization	GO:0099173	FALSE	0.00783502	2.10596	168	81	7	21128	ACTB,ACTG1,BAIAP2,HDAC6,HSPA8,LRRK2,VPS35
	GO:BP	regulation of intrinsic apoptotic signaling pathway	GO:2001242	FALSE	0.000553304	3.25704	168	81	8	21128	AKT1,CCAR2,CYLD,DNAJA1,LRRK2,MYC,SIRT1,TP53
	GO:BP	import into nucleus	GO:0051170	FALSE	0.00847247	2.07199	170	81	7	21128	AKT1,HSP90AB1,LRRK2,PIK3R1,RPL23,SQSTM1,TP53
	GO:BP	regulation of ubiquitin-dependent protein catabolic process	GO:2000058	FALSE	4.40231e-05	4.35632	173	81	9	21128	AKT1,CCAR2,CSNK1A1,CSNK1D,GSK3B,HSP90AB1,LRRK2,RPL23,STUB1
	GO:BP	regulation of carbohydrate metabolic process	GO:0006109	FALSE	0.00101877	2.99192	182	81	8	21128	AKT1,APP,DDB1,GSK3B,PPP1CA,SIRT1,SNCA,TP53
	GO:BP	response to temperature stimulus	GO:0009266	FALSE	4.50105e-06	5.34669	184	81	10	21128	AKT1,CREBBP,DNAJA1,GSK3B,HSP90AB1,MAPT,PRKACA,SIRT1,STUB1,YWHAE
	GO:BP	mitochondrial transport	GO:0006839	FALSE	0.015307	1.81511	186	81	7	21128	CNP,GSK3B,HAX1,HSPA4,LRRK2,TP53,VPS35
	GO:BP	positive regulation of protein-containing complex assembly	GO:0031334	FALSE	0.0194851	1.7103	193	81	7	21128	BAIAP2,GSK3B,MAPRE1,MAPT,SNCA,STUB1,TP53
	GO:BP	regulation of proteasomal protein catabolic process	GO:0061136	FALSE	8.28751e-06	5.08158	196	81	10	21128	AKT1,BAG2,CCAR2,CSNK1A1,CSNK1D,GSK3B,HSP90AB1,LRRK2,PRKACA,STUB1
	GO:BP	positive regulation of intracellular transport	GO:0032388	FALSE	0.0237818	1.62376	199	81	7	21128	DYNC1H1,GSK3B,HSP90AB1,PIK3R1,PRKACA,SFN,YWHAE
	GO:BP	DNA biosynthetic process	GO:0071897	FALSE	0.00207903	2.68214	200	81	8	21128	CCT3,CCT5,CCT6A,CCT8,HSP90AB1,MYC,SIRT1,TP53
	GO:BP	regulation of protein binding	GO:0043393	FALSE	6.54111e-07	6.18435	202	81	11	21128	ACTB,AKT1,APP,BAG2,GSK3B,HSP90AB1,LRRK2,MAPRE1,PPP1CA,PRKACA,STUB1
	GO:BP	cellular response to insulin stimulus	GO:0032869	TRUE	0.0270611	1.56766	203	81	7	21128	AKT1,BAIAP2,GSK3B,PIK3R1,PKM,SIRT1,YWHAG
	GO:BP	negative regulation of protein kinase activity	GO:0006469	FALSE	0.0288361	1.54006	205	81	7	21128	AKT1,DNAJA1,PLEC,SFN,SIRT1,SNCA,YWHAG
	GO:BP	cytoskeleton-dependent intracellular transport	GO:0030705	FALSE	0.00250315	2.60151	205	81	8	21128	APP,DYNC1H1,HDAC6,HSPA8,HTT,MAPT,TUBA1A,TUBB
	GO:BP	regulation of synaptic plasticity	GO:0048167	FALSE	0.00289363	2.53856	209	81	8	21128	APP,BAIAP2,GSK3B,MAPT,SNCA,SQSTM1,YWHAG,YWHAH
	GO:BP	protein stabilization	GO:0050821	FALSE	0.000224128	3.6495	209	81	9	21128	BAG2,CCT3,CCT5,CCT6A,CCT8,HSP90AB1,PIK3R1,RPL23,TP53
	GO:BP	regulation of protein ubiquitination	GO:0031396	FALSE	0.00299898	2.52303	210	81	8	21128	AKT1,BAG2,DNAJA1,HSP90AB1,LRRK2,RPL23,SQSTM1,STUB1
	GO:BP	positive regulation of protein catabolic process	GO:0045732	FALSE	0.000253092	3.59672	212	81	9	21128	AKT1,BAG2,CSNK1A1,CSNK1D,DDB1,GSK3B,LRRK2,STUB1,VPS35
	GO:BP	circadian rhythm	GO:0007623	FALSE	0.0380618	1.41951	214	81	7	21128	CCAR2,CSNK1D,DDB1,GSK3B,PPP1CA,SIRT1,TP53
	GO:BP	regulation of synapse organization	GO:0050807	FALSE	0.000274165	3.56199	214	81	9	21128	APP,BAIAP2,HSPA8,LRRK2,SNCA,TUBA1A,TUBB,VPS35,YWHAZ
	GO:BP	negative regulation of neuron death	GO:1901215	FALSE	0.0404121	1.39349	216	81	7	21128	AKT1,GSK3B,HSP90AB1,LRRK2,SIRT1,SNCA,VPS35
	GO:BP	vesicle-mediated transport in synapse	GO:0099003	FALSE	0.0416314	1.38058	217	81	7	21128	ACTB,ACTG1,GSK3B,LRRK2,SH3GL1,SNCA,VPS35
	GO:BP	protein folding	GO:0006457	TRUE	2.40122e-05	4.61957	219	81	10	21128	BAG2,CCT3,CCT5,CCT6A,CCT8,DNAJA1,HSP90AB1,HSPA4,HSPA8,HSPA9
	GO:BP	regulation of synapse structure or activity	GO:0050803	FALSE	0.000346828	3.45989	220	81	9	21128	APP,BAIAP2,HSPA8,LRRK2,SNCA,TUBA1A,TUBB,VPS35,YWHAZ
	GO:BP	negative regulation of kinase activity	GO:0033673	FALSE	0.00553752	2.25668	228	81	8	21128	AKT1,DNAJA1,MAPT,PLEC,SFN,SIRT1,SNCA,YWHAG
	GO:BP	regulation of intracellular protein transport	GO:0033157	FALSE	0.00553752	2.25668	228	81	8	21128	GSK3B,HAX1,HSP90AB1,LRRK2,PIK3R1,PRKACA,SFN,YWHAE
	GO:BP	regulation of proteolysis involved in protein catabolic process	GO:1903050	FALSE	2.71248e-06	5.56663	231	81	11	21128	AKT1,BAG2,CCAR2,CSNK1A1,CSNK1D,GSK3B,HSP90AB1,LRRK2,PRKACA,RPL23,STUB1
	GO:BP	protein acetylation	GO:0006473	FALSE	0.0062999	2.20067	232	81	8	21128	ACTB,CREBBP,GSK3B,HDAC6,MAPT,SGF29,SIRT1,SNCA
	GO:BP	regulation of canonical Wnt signaling pathway	GO:0060828	FALSE	8.1098e-05	4.09099	249	81	10	21128	CCAR2,CSNK1A1,CSNK1D,CYLD,EDA,EGFR,GSK3B,LRRK2,PPP1CA,VPS35
	GO:BP	regulation of protein modification by small protein conjugation or removal	GO:1903320	FALSE	0.0115917	1.93585	252	81	8	21128	AKT1,BAG2,DNAJA1,HSP90AB1,LRRK2,RPL23,SQSTM1,STUB1
	GO:BP	regulation of microtubule-based process	GO:0032886	FALSE	0.0141682	1.84868	259	81	8	21128	CYLD,DYNC1H1,GSK3B,HDAC6,MAPRE1,MAPT,SIRT1,SNCA
	GO:BP	negative regulation of transferase activity	GO:0051348	FALSE	1.04427e-06	5.98119	271	81	12	21128	AKT1,BAG2,DNAJA1,GSK3B,MAPT,PLEC,RPL23,SFN,SIRT1,SNCA,TP53,YWHAG
	GO:BP	regulation of transmembrane transporter activity	GO:0022898	FALSE	0.020795	1.68204	273	81	8	21128	ACTB,APP,CAMK2D,HTT,PRKACA,SNCA,YWHAE,YWHAH
	GO:BP	protein acylation	GO:0043543	FALSE	0.0213546	1.67051	274	81	8	21128	ACTB,CREBBP,GSK3B,HDAC6,MAPT,SGF29,SIRT1,SNCA
	GO:BP	cellular response to oxidative stress	GO:0034599	FALSE	0.0219269	1.65902	275	81	8	21128	AKT1,EGFR,HDAC6,LRRK2,MAPT,SIRT1,SNCA,TP53
	GO:BP	regulation of transporter activity	GO:0032409	FALSE	0.0321943	1.49222	290	81	8	21128	ACTB,APP,CAMK2D,HTT,PRKACA,SNCA,YWHAE,YWHAH
	GO:BP	positive regulation of DNA metabolic process	GO:0051054	FALSE	0.000447112	3.34958	299	81	10	21128	ACTB,AKT1,CCT3,CCT5,CCT6A,CCT8,EGFR,HSP90AB1,MYC,SIRT1
	GO:BP	canonical Wnt signaling pathway	GO:0060070	FALSE	0.000447112	3.34958	299	81	10	21128	CCAR2,CSNK1A1,CSNK1D,CYLD,EDA,EGFR,GSK3B,LRRK2,PPP1CA,VPS35
	GO:BP	intrinsic apoptotic signaling pathway	GO:0097193	FALSE	0.000447112	3.34958	299	81	10	21128	AKT1,CCAR2,CYLD,DNAJA1,LRRK2,MYC,PIK3R1,SFN,SIRT1,TP53
	GO:BP	rhythmic process	GO:0048511	FALSE	0.0484556	1.31466	307	81	8	21128	CCAR2,CREBBP,CSNK1D,DDB1,GSK3B,PPP1CA,SIRT1,TP53
	GO:BP	protein localization to nucleus	GO:0034504	FALSE	2.40634e-08	7.61864	309	81	14	21128	AKT1,BANP,CCT3,CCT5,CCT6A,CCT8,GSK3B,HSP90AB1,LRRK2,PIK3R1,RPL23,SQSTM1,TP53,YWHAE
	GO:BP	peptidyl-serine phosphorylation	GO:0018105	FALSE	4.09454e-07	6.38779	313	81	13	21128	AKT1,APP,CAMK2D,CSNK1A1,CSNK1D,EGFR,GSK3B,HAX1,HDAC6,HSP90AB1,LRRK2,PRKACA,SNCA
	GO:BP	positive regulation of establishment of protein localization	GO:1904951	FALSE	6.788e-05	4.16826	315	81	11	21128	CCT3,CCT5,CCT6A,CCT8,GSK3B,HSP90AB1,PIK3R1,PRKACA,SFN,VPS35,YWHAE
	GO:BP	response to light stimulus	GO:0009416	FALSE	7.72103e-05	4.11232	319	81	11	21128	AKT1,APP,CCAR2,CREBBP,DDB1,EGFR,MYC,PIK3R1,PPP1CA,SIRT1,TP53
	GO:BP	macroautophagy	GO:0016236	FALSE	0.000858901	3.06606	321	81	10	21128	AKT1,HDAC6,HTT,LRRK2,OPTN,PRKACA,SIRT1,SQSTM1,TP53,VPS35
	GO:BP	regulation of protein stability	GO:0031647	TRUE	2.23496e-14	13.6507	321	81	19	21128	BAG2,CCAR2,CCT3,CCT5,CCT6A,CCT8,CREBBP,HDAC6,HSP90AB1,HSPA8,HTT,LRRK2,PIK3R1,RPL23,SIRT1,SNCA,STUB1,TP53,VPS35
	GO:BP	regulation of neuron death	GO:1901214	FALSE	0.000935213	3.02909	324	81	10	21128	AKT1,GSK3B,HDAC6,HSP90AB1,LRRK2,MAPT,SIRT1,SNCA,TP53,VPS35
	GO:BP	regulation of Wnt signaling pathway	GO:0030111	FALSE	9.33527e-05	4.02987	325	81	11	21128	APP,CCAR2,CSNK1A1,CSNK1D,CYLD,EDA,EGFR,GSK3B,LRRK2,PPP1CA,VPS35
	GO:BP	nucleocytoplasmic transport	GO:0006913	FALSE	9.70068e-06	5.0132	330	81	12	21128	AKT1,GSK3B,HSP90AB1,HSPA9,LRRK2,PIK3R1,PRKACA,RPL23,SFN,SQSTM1,TP53,YWHAE
	GO:BP	nuclear transport	GO:0051169	FALSE	9.70068e-06	5.0132	330	81	12	21128	AKT1,GSK3B,HSP90AB1,HSPA9,LRRK2,PIK3R1,PRKACA,RPL23,SFN,SQSTM1,TP53,YWHAE
	GO:BP	negative regulation of catabolic process	GO:0009895	FALSE	0.00113681	2.94431	331	81	10	21128	AKT1,BANP,CCAR2,EGFR,HSP90AB1,LRRK2,RPL23,SNCA,TP53,VPS35
	GO:BP	peptidyl-serine modification	GO:0018209	FALSE	8.13432e-07	6.08968	331	81	13	21128	AKT1,APP,CAMK2D,CSNK1A1,CSNK1D,EGFR,GSK3B,HAX1,HDAC6,HSP90AB1,LRRK2,PRKACA,SNCA
	GO:BP	cellular response to chemical stress	GO:0062197	FALSE	0.00116852	2.93236	332	81	10	21128	AKT1,DNAJA1,EGFR,HDAC6,LRRK2,MAPT,PLEC,SIRT1,SNCA,TP53
	GO:BP	regulation of intracellular transport	GO:0032386	FALSE	0.00126833	2.89677	335	81	10	21128	DYNC1H1,GSK3B,HAX1,HSP90AB1,LRRK2,PIK3R1,PRKACA,SFN,VPS35,YWHAE
	GO:BP	negative regulation of proteolysis	GO:0045861	FALSE	0.000152035	3.81806	341	81	11	21128	AKT1,APP,CCAR2,CSTA,HDAC6,HSP90AB1,LRRK2,RPL23,SFN,SNCA,TP53
	GO:BP	regulation of autophagy	GO:0010506	FALSE	1.16968e-07	6.93193	348	81	14	21128	AKT1,EEF1A2,GSK3B,HAX1,HDAC6,HTT,LRRK2,MAPT,OPTN,PRKACA,SIRT1,SNCA,TP53,VPS35
	GO:BP	negative regulation of phosphorylation	GO:0042326	FALSE	0.0216131	1.66528	363	81	9	21128	AKT1,DNAJA1,LRRK2,MAPT,PLEC,SFN,SIRT1,SNCA,YWHAG
	GO:BP	cellular response to peptide	GO:1901653	FALSE	0.000285542	3.54433	363	81	11	21128	AKT1,APP,BAIAP2,GSK3B,PIK3R1,PKM,RPL23,SIRT1,TP53,VIM,YWHAG
	GO:BP	response to metal ion	GO:0010038	FALSE	0.0220928	1.65575	364	81	9	21128	ACTG1,AKT1,APP,CAMK2D,EGFR,LRRK2,MAPT,PPP1CA,SNCA
	GO:BP	regulation of apoptotic signaling pathway	GO:2001233	FALSE	0.000310131	3.50846	366	81	11	21128	AKT1,CCAR2,CYLD,DNAJA1,GSK3B,HTT,LRRK2,MYC,PPP1CA,SIRT1,TP53
	GO:BP	regulation of protein catabolic process	GO:0042176	FALSE	7.68603e-11	10.1143	366	81	17	21128	AKT1,BAG2,BANP,CCAR2,CSNK1A1,CSNK1D,DDB1,EEF1A2,EGFR,GSK3B,HSP90AB1,LRRK2,PRKACA,PSMD2,SNCA,STUB1,VPS35
	GO:BP	neuron death	GO:0070997	FALSE	3.16693e-05	4.49936	367	81	12	21128	AKT1,APP,ATN1,GSK3B,HDAC6,HSP90AB1,LRRK2,MAPT,SIRT1,SNCA,TP53,VPS35
	GO:BP	positive regulation of proteolysis	GO:0045862	FALSE	3.36316e-05	4.47325	369	81	12	21128	AKT1,APP,BAG2,CSNK1A1,CSNK1D,GSK3B,LRRK2,MAPT,MYC,SIRT1,SNCA,STUB1
	GO:BP	regulation of binding	GO:0051098	FALSE	3.67804e-05	4.43438	372	81	12	21128	ACTB,AKT1,APP,BAG2,CSNK1A1,GSK3B,HSP90AB1,LRRK2,MAPRE1,PPP1CA,PRKACA,STUB1
	GO:BP	regulation of supramolecular fiber organization	GO:1902903	FALSE	0.00405252	2.39227	381	81	10	21128	ACTG1,APP,BAIAP2,HAX1,HDAC6,HSPA8,MAPRE1,MAPT,PIK3R1,SNCA
	GO:BP	non-membrane-bounded organelle assembly	GO:0140694	FALSE	0.0352094	1.45334	386	81	9	21128	ACTG1,CSNK1D,DYNC1H1,MAPRE1,MAPT,PLEC,RPL24,RPS14,TUBB
	GO:BP	regulation of protein serine/threonine kinase activity	GO:0071900	FALSE	0.00455344	2.34166	386	81	10	21128	ACTB,AKT1,DNAJA1,EGFR,HSP90AB1,HTT,LRRK2,SFN,SIRT1,SNCA
	GO:BP	regulation of protein-containing complex assembly	GO:0043254	FALSE	0.000937412	3.02807	409	81	11	21128	BAIAP2,GSK3B,HAX1,HDAC6,HSPA8,MAPRE1,MAPT,SNCA,STUB1,TP53,VPS35
	GO:BP	negative regulation of phosphate metabolic process	GO:0045936	FALSE	1.40515e-05	4.85228	419	81	13	21128	AKT1,DNAJA1,GSK3B,LRRK2,MAPT,PLEC,SFN,SIRT1,SNCA,TP53,YWHAB,YWHAE,YWHAG
	GO:BP	positive regulation of cellular catabolic process	GO:0031331	FALSE	0.000139158	3.85649	420	81	12	21128	AGO2,AKT1,APP,CSNK1A1,CSNK1D,GSK3B,HTT,LRRK2,OPTN,SIRT1,SNCA,STUB1
	GO:BP	negative regulation of phosphorus metabolic process	GO:0010563	FALSE	1.44564e-05	4.83994	420	81	13	21128	AKT1,DNAJA1,GSK3B,LRRK2,MAPT,PLEC,SFN,SIRT1,SNCA,TP53,YWHAB,YWHAE,YWHAG
	GO:BP	regulation of membrane potential	GO:0042391	FALSE	0.0111392	1.95314	427	81	10	21128	AKT1,APP,BAIAP2,CAMK2D,GSK3B,LRRK2,MAPT,SNCA,YWHAE,YWHAH
	GO:BP	regulation of cell growth	GO:0001558	FALSE	0.0116062	1.93531	429	81	10	21128	AKT1,CAMK2D,CCAR2,EGFR,GSK3B,HDAC6,MAPT,SFN,SIRT1,TP53
	GO:BP	synapse organization	GO:0050808	FALSE	2.38059e-05	4.62332	438	81	13	21128	ACTB,ACTG1,APP,BAIAP2,HDAC6,HSPA8,LRRK2,MAPT,SNCA,TUBA1A,TUBB,VPS35,YWHAZ
	GO:BP	establishment of organelle localization	GO:0051656	FALSE	0.0153776	1.81311	443	81	10	21128	CSNK1D,DCTN2,DYNC1H1,HDAC6,HTT,LRRK2,MAPRE1,MAPT,SNCA,YWHAZ
	GO:BP	axonogenesis	GO:0007409	FALSE	0.0166332	1.77903	447	81	10	21128	ACTB,APP,BAIAP2,CNP,GSK3B,HDAC6,HSP90AB1,MAPT,RPL24,TUBB3
	GO:BP	Wnt signaling pathway	GO:0016055	FALSE	0.000279954	3.55291	448	81	12	21128	APP,CCAR2,CSNK1A1,CSNK1D,CYLD,DDB1,EDA,EGFR,GSK3B,LRRK2,PPP1CA,VPS35
	GO:BP	response to radiation	GO:0009314	FALSE	0.00234241	2.63034	449	81	11	21128	AKT1,APP,CCAR2,CREBBP,DDB1,EGFR,MYC,PIK3R1,PPP1CA,SIRT1,TP53
	GO:BP	cell-cell signaling by wnt	GO:0198738	FALSE	0.000293723	3.53206	450	81	12	21128	APP,CCAR2,CSNK1A1,CSNK1D,CYLD,DDB1,EDA,EGFR,GSK3B,LRRK2,PPP1CA,VPS35
	GO:BP	proteasome-mediated ubiquitin-dependent protein catabolic process	GO:0043161	FALSE	0.00266558	2.57421	455	81	11	21128	AKT1,CCAR2,CSNK1A1,CSNK1D,DDB1,GSK3B,HSP90AB1,LRRK2,PSMD2,SIRT1,STUB1
	GO:BP	modulation of chemical synaptic transmission	GO:0050804	FALSE	0.00266558	2.57421	455	81	11	21128	APP,BAIAP2,GSK3B,HDAC6,LRRK2,MAPT,PRKACA,SNCA,SQSTM1,YWHAG,YWHAH
	GO:BP	regulation of trans-synaptic signaling	GO:0099177	FALSE	0.0027231	2.56494	456	81	11	21128	APP,BAIAP2,GSK3B,HDAC6,LRRK2,MAPT,PRKACA,SNCA,SQSTM1,YWHAG,YWHAH
	GO:BP	positive regulation of protein localization	GO:1903829	FALSE	4.1269e-07	6.38438	459	81	15	21128	AKT1,CCT3,CCT5,CCT6A,CCT8,EGFR,GSK3B,HSP90AB1,MAPT,PIK3R1,PRKACA,SFN,SQSTM1,VPS35,YWHAE
	GO:BP	regulation of amide metabolic process	GO:0034248	FALSE	0.0252505	1.59773	469	81	10	21128	AGO2,AKT1,APP,MYC,PKM,PPP1CA,RPS14,SNCA,TP53,VIM
	GO:BP	histone modification	GO:0016570	FALSE	0.00057395	3.24113	479	81	12	21128	ACTB,CAMK2D,CREBBP,DDB1,HDAC6,LRRK2,PRMT2,SETD1A,SGF29,SIRT1,SNCA,TP53
	GO:BP	cellular component disassembly	GO:0022411	FALSE	8.9116e-05	4.05004	490	81	13	21128	GSK3B,HAX1,HDAC6,HSPA8,HTT,MYC,OPTN,PIK3R1,PPP1CA,RPL23,SH3GL1,SQSTM1,TP53
	GO:BP	regulation of mitotic cell cycle	GO:0007346	FALSE	0.0381404	1.41862	492	81	10	21128	ACTB,AKT1,APP,CYLD,DDB1,EGFR,PRMT2,SIRT1,TP53,YWHAE
	GO:BP	negative regulation of protein modification process	GO:0031400	FALSE	1.05291e-07	6.97761	493	81	16	21128	AKT1,BAG2,DNAJA1,GSK3B,HDAC6,LRRK2,MAPT,PLEC,RPL23,SFN,SIRT1,SNCA,SQSTM1,YWHAB,YWHAE,YWHAG
	GO:BP	axon development	GO:0061564	FALSE	0.0408809	1.38848	496	81	10	21128	ACTB,APP,BAIAP2,CNP,GSK3B,HDAC6,HSP90AB1,MAPT,RPL24,TUBB3
	GO:BP	response to peptide	GO:1901652	FALSE	0.00625271	2.20393	497	81	11	21128	AKT1,APP,BAIAP2,GSK3B,PIK3R1,PKM,RPL23,SIRT1,TP53,VIM,YWHAG
	GO:BP	cell growth	GO:0016049	FALSE	0.000105149	3.97819	497	81	13	21128	AKT1,APP,CAMK2D,CCAR2,EGFR,GSK3B,HDAC6,HSP90AB1,MAPT,PRMT2,SFN,SIRT1,TP53
	GO:BP	regulation of protein transport	GO:0051223	FALSE	0.00637433	2.19557	498	81	11	21128	DNAJA1,GSK3B,HAX1,HSP90AB1,HSPA8,LRRK2,PIK3R1,PRKACA,SFN,VPS35,YWHAE
	GO:BP	positive regulation of cellular component biogenesis	GO:0044089	FALSE	0.0453092	1.34381	502	81	10	21128	BAIAP2,DYNC1H1,GSK3B,HTT,MAPRE1,MAPT,PIK3R1,SNCA,STUB1,TP53
	GO:BP	positive regulation of organelle organization	GO:0010638	FALSE	1.53145e-05	4.8149	507	81	14	21128	BAIAP2,CCT3,CCT5,CCT6A,CCT8,DYNC1H1,GSK3B,HAX1,HTT,MAPRE1,MAPT,SNCA,TP53,VPS35
	GO:BP	positive regulation of apoptotic process	GO:0043065	FALSE	0.000138778	3.85768	509	81	13	21128	CAMK2D,CCAR2,CYLD,DNAJA1,EEF1A2,HTT,MYC,PPP1CA,PRMT2,SIRT1,SNCA,SQSTM1,TP53
	GO:BP	positive regulation of catabolic process	GO:0009896	FALSE	2.3595e-06	5.62718	521	81	15	21128	AGO2,AKT1,APP,BAG2,CSNK1A1,CSNK1D,DDB1,GSK3B,HTT,LRRK2,OPTN,SIRT1,SNCA,STUB1,VPS35
	GO:BP	positive regulation of programmed cell death	GO:0043068	FALSE	2.42207e-06	5.61581	522	81	15	21128	CAMK2D,CCAR2,CYLD,DNAJA1,EEF1A2,HDAC6,HTT,LRRK2,MYC,PPP1CA,PRMT2,SIRT1,SNCA,SQSTM1,TP53
	GO:BP	regulation of establishment of protein localization	GO:0070201	FALSE	2.35655e-08	7.62772	523	81	17	21128	CCT3,CCT5,CCT6A,CCT8,DNAJA1,GSK3B,HAX1,HDAC6,HSP90AB1,HSPA8,LRRK2,MAPT,PIK3R1,PRKACA,SFN,VPS35,YWHAE
	GO:BP	proteasomal protein catabolic process	GO:0010498	FALSE	0.000203037	3.69242	526	81	13	21128	AKT1,BAG2,CCAR2,CSNK1A1,CSNK1D,DDB1,GSK3B,HSP90AB1,LRRK2,PRKACA,PSMD2,SIRT1,STUB1
	GO:BP	regulation of DNA metabolic process	GO:0051052	FALSE	0.00184976	2.73288	535	81	12	21128	ACTB,AKT1,CCT3,CCT5,CCT6A,CCT8,EGFR,HSP90AB1,MYC,SGF29,SIRT1,TP53
	GO:BP	mitochondrion organization	GO:0007005	FALSE	3.39809e-09	8.46877	539	81	18	21128	AKT1,CCAR2,CNP,GSK3B,HAX1,HDAC6,HSPA4,HSPA9,HTT,LRRK2,MAPT,OPTN,PLEC,SFN,SNCA,SQSTM1,TP53,VPS35
	GO:BP	regulation of cytoskeleton organization	GO:0051493	FALSE	0.0140136	1.85345	541	81	11	21128	ACTG1,BAIAP2,CYLD,DYNC1H1,GSK3B,HAX1,HDAC6,MAPRE1,MAPT,PIK3R1,SNCA
	GO:BP	response to inorganic substance	GO:0010035	FALSE	0.00271503	2.56623	555	81	12	21128	ACTG1,AKT1,APP,CAMK2D,EGFR,HDAC6,LRRK2,MAPT,PLEC,PPP1CA,SIRT1,SNCA
	GO:BP	process utilizing autophagic mechanism	GO:0061919	FALSE	7.27427e-08	7.13821	562	81	17	21128	AKT1,EEF1A2,GSK3B,HAX1,HDAC6,HSPA8,HTT,LRRK2,MAPT,OPTN,PRKACA,SIRT1,SNCA,SQSTM1,STUB1,TP53,VPS35
	GO:BP	autophagy	GO:0006914	FALSE	7.27427e-08	7.13821	562	81	17	21128	AKT1,EEF1A2,GSK3B,HAX1,HDAC6,HSPA8,HTT,LRRK2,MAPT,OPTN,PRKACA,SIRT1,SNCA,SQSTM1,STUB1,TP53,VPS35
	GO:BP	cell surface receptor signaling pathway involved in cell-cell signaling	GO:1905114	FALSE	9.20003e-06	5.03621	576	81	15	21128	AKT1,APP,BAIAP2,CCAR2,CSNK1A1,CSNK1D,CYLD,DDB1,EDA,EGFR,GSK3B,LRRK2,PPP1CA,SNCA,VPS35
	GO:BP	cell morphogenesis involved in neuron differentiation	GO:0048667	FALSE	0.0040656	2.39088	577	81	12	21128	ACTB,APP,BAIAP2,CNP,GSK3B,HDAC6,HSP90AB1,LRRK2,MAPT,RPL24,TUBB3,YWHAH
	GO:BP	cellular response to organic cyclic compound	GO:0071407	FALSE	9.8663e-06	5.00585	579	81	15	21128	ACTB,APP,DNAJA1,EGFR,GSK3B,HDAC6,HSP90AB1,HSPA8,LRRK2,PRKACA,PRMT2,SIRT1,SNCA,VPS35,YWHAH
	GO:BP	positive regulation of cell death	GO:0010942	FALSE	1.47029e-07	6.8326	588	81	17	21128	CAMK2D,CCAR2,CYLD,DNAJA1,EEF1A2,GSK3B,HDAC6,HTT,LRRK2,MAPT,MYC,PPP1CA,PRMT2,SIRT1,SNCA,SQSTM1,TP53
	GO:BP	apoptotic signaling pathway	GO:0097190	FALSE	0.000863936	3.06352	597	81	13	21128	AKT1,CCAR2,CYLD,DNAJA1,GSK3B,HTT,LRRK2,MYC,PIK3R1,PPP1CA,SFN,SIRT1,TP53
	GO:BP	cellular response to hormone stimulus	GO:0032870	FALSE	0.000880452	3.05529	598	81	13	21128	AKT1,BAIAP2,DNAJA1,GSK3B,HDAC6,HSPA8,PIK3R1,PKM,PRKACA,PRMT2,SIRT1,YWHAG,YWHAH
	GO:BP	neuron projection morphogenesis	GO:0048812	FALSE	0.0108579	1.96425	635	81	12	21128	ACTB,APP,BAIAP2,CNP,GSK3B,HDAC6,HSP90AB1,LRRK2,MAPT,RPL24,TUBB3,YWHAH
	GO:BP	regulation of plasma membrane bounded cell projection organization	GO:0120035	FALSE	0.0117577	1.92968	640	81	12	21128	AKT1,BAIAP2,CYLD,GSK3B,HDAC6,HTT,LRRK2,MAPT,PIK3R1,VIM,VPS35,YWHAH
	GO:BP	cellular response to organonitrogen compound	GO:0071417	FALSE	5.70178e-07	6.24399	642	81	17	21128	ACTB,AKT1,APP,BAIAP2,EGFR,GSK3B,LRRK2,PIK3R1,PKM,PRKACA,RPL23,SIRT1,SNCA,TP53,VIM,VPS35,YWHAG
	GO:BP	cell morphogenesis involved in differentiation	GO:0000904	FALSE	0.0133344	1.87503	648	81	12	21128	ACTB,APP,BAIAP2,CNP,GSK3B,HDAC6,HSP90AB1,LRRK2,MAPT,RPL24,TUBB3,YWHAH
	GO:BP	plasma membrane bounded cell projection morphogenesis	GO:0120039	FALSE	0.0139719	1.85474	651	81	12	21128	ACTB,APP,BAIAP2,CNP,GSK3B,HDAC6,HSP90AB1,LRRK2,MAPT,RPL24,TUBB3,YWHAH
	GO:BP	microtubule cytoskeleton organization	GO:0000226	FALSE	6.12176e-06	5.21312	652	81	16	21128	CNP,CSNK1D,CYLD,DCTN2,DYNC1H1,GSK3B,HDAC6,HTT,MAPRE1,MAPT,SIRT1,SNCA,TUBA1A,TUBB,TUBB3,TUBB4B
	GO:BP	regulation of cell projection organization	GO:0031344	FALSE	0.0150943	1.82119	656	81	12	21128	AKT1,BAIAP2,CYLD,GSK3B,HDAC6,HTT,LRRK2,MAPT,PIK3R1,VIM,VPS35,YWHAH
	GO:BP	cell projection morphogenesis	GO:0048858	FALSE	0.0150943	1.82119	656	81	12	21128	ACTB,APP,BAIAP2,CNP,GSK3B,HDAC6,HSP90AB1,LRRK2,MAPT,RPL24,TUBB3,YWHAH
	GO:BP	regulation of protein kinase activity	GO:0045859	FALSE	0.00270634	2.56762	661	81	13	21128	ACTB,AKT1,APP,DNAJA1,EGFR,HSP90AB1,HTT,LRRK2,PLEC,SFN,SIRT1,SNCA,YWHAG
	GO:BP	establishment of protein localization to organelle	GO:0072594	FALSE	9.54676e-07	6.02014	664	81	17	21128	AKT1,CCT3,CCT5,CCT6A,CCT8,DNAJA1,HAX1,HSP90AB1,HSPA4,HSPA8,LRRK2,MAPT,PIK3R1,RPL23,SGF29,SQSTM1,TP53
	GO:BP	cell part morphogenesis	GO:0032990	FALSE	0.00341398	2.46674	675	81	13	21128	ACTB,APP,BAIAP2,CNP,GSK3B,HDAC6,HSP90AB1,LRRK2,MAPT,PLEC,RPL24,TUBB3,YWHAH
	GO:BP	ubiquitin-dependent protein catabolic process	GO:0006511	FALSE	0.00010316	3.98649	691	81	15	21128	AKT1,CCAR2,CSNK1A1,CSNK1D,CYLD,DDB1,GSK3B,HDAC6,HSP90AB1,LRRK2,PSMD2,RPL23,SIRT1,SQSTM1,STUB1
	GO:BP	cellular response to nitrogen compound	GO:1901699	FALSE	2.03988e-06	5.69039	698	81	17	21128	ACTB,AKT1,APP,BAIAP2,EGFR,GSK3B,LRRK2,PIK3R1,PKM,PRKACA,RPL23,SIRT1,SNCA,TP53,VIM,VPS35,YWHAG
	GO:BP	modification-dependent protein catabolic process	GO:0019941	FALSE	0.000124464	3.90496	701	81	15	21128	AKT1,CCAR2,CSNK1A1,CSNK1D,CYLD,DDB1,GSK3B,HDAC6,HSP90AB1,LRRK2,PSMD2,RPL23,SIRT1,SQSTM1,STUB1
	GO:BP	negative regulation of cellular component organization	GO:0051129	FALSE	0.00525895	2.2791	702	81	13	21128	AKT1,GSK3B,HDAC6,HSPA8,LRRK2,MAPRE1,MAPT,PIK3R1,SNCA,TP53,VIM,VPS35,YWHAH
	GO:BP	response to growth factor	GO:0070848	FALSE	0.00551073	2.25879	705	81	13	21128	AKT1,APP,BAIAP2,CREBBP,CSNK1D,EGFR,HDAC6,HSP90AB1,MAPT,MYC,SIRT1,STUB1,TP53
	GO:BP	cell junction organization	GO:0034330	FALSE	1.96652e-05	4.7063	708	81	16	21128	ACTB,ACTG1,APP,BAIAP2,HDAC6,HSPA8,LRRK2,MAPT,PIK3R1,PLEC,PRKACA,SNCA,TUBA1A,TUBB,VPS35,YWHAZ
	GO:BP	regulation of cellular response to stress	GO:0080135	FALSE	2.69671e-06	5.56917	711	81	17	21128	ACTB,AKT1,APP,CCAR2,CREBBP,CYLD,DNAJA1,EGFR,GSK3B,HDAC6,LRRK2,MAPT,MYC,PIK3R1,SGF29,SIRT1,TP53
	GO:BP	modification-dependent macromolecule catabolic process	GO:0043632	FALSE	0.000155272	3.80891	713	81	15	21128	AKT1,CCAR2,CSNK1A1,CSNK1D,CYLD,DDB1,GSK3B,HDAC6,HSP90AB1,LRRK2,PSMD2,RPL23,SIRT1,SQSTM1,STUB1
	GO:BP	regulation of cell cycle process	GO:0010564	FALSE	0.0382488	1.41738	720	81	12	21128	ACTB,AKT1,APP,CCAR2,DDB1,DYNC1H1,EGFR,MYC,PRMT2,RPL23,SIRT1,TP53
	GO:BP	anterograde trans-synaptic signaling	GO:0098916	FALSE	0.00736979	2.13254	724	81	13	21128	AKT1,APP,BAIAP2,CNP,GSK3B,HDAC6,LRRK2,MAPT,PRKACA,SNCA,SQSTM1,YWHAG,YWHAH
	GO:BP	chemical synaptic transmission	GO:0007268	FALSE	0.00736979	2.13254	724	81	13	21128	AKT1,APP,BAIAP2,CNP,GSK3B,HDAC6,LRRK2,MAPT,PRKACA,SNCA,SQSTM1,YWHAG,YWHAH
	GO:BP	trans-synaptic signaling	GO:0099537	FALSE	0.00818382	2.08704	731	81	13	21128	AKT1,APP,BAIAP2,CNP,GSK3B,HDAC6,LRRK2,MAPT,PRKACA,SNCA,SQSTM1,YWHAG,YWHAH
	GO:BP	regulation of proteolysis	GO:0030162	FALSE	7.29813e-09	8.13679	737	81	20	21128	AKT1,APP,BAG2,CCAR2,CSNK1A1,CSNK1D,CSTA,GSK3B,HDAC6,HSP90AB1,LRRK2,MAPT,MYC,PRKACA,RPL23,SFN,SIRT1,SNCA,STUB1,TP53
	GO:BP	translation	GO:0006412	TRUE	0.00167666	2.77556	743	81	14	21128	AGO2,AKT1,APP,EEF1A2,MYC,PKM,PPP1CA,RPL13,RPL23,RPL24,RPS11,RPS14,TUFM,VIM
	GO:BP	synaptic signaling	GO:0099536	FALSE	0.011782	1.92878	756	81	13	21128	AKT1,APP,BAIAP2,CNP,GSK3B,HDAC6,LRRK2,MAPT,PRKACA,SNCA,SQSTM1,YWHAG,YWHAH
	GO:BP	negative regulation of catalytic activity	GO:0043086	FALSE	1.11784e-06	5.95162	768	81	18	21128	AKT1,APP,BAG2,CCAR2,CSTA,DNAJA1,GSK3B,HDAC6,LRRK2,MAPT,PLEC,RPL23,SFN,SIRT1,SNCA,TP53,YWHAB,YWHAG
	GO:BP	peptide biosynthetic process	GO:0043043	FALSE	0.0026369	2.57891	772	81	14	21128	AGO2,AKT1,APP,EEF1A2,MYC,PKM,PPP1CA,RPL13,RPL23,RPL24,RPS11,RPS14,TUFM,VIM
	GO:BP	mitotic cell cycle process	GO:1903047	FALSE	0.0149699	1.82478	773	81	13	21128	ACTB,AKT1,APP,DCTN2,DDB1,DYNC1H1,EGFR,HTT,MAPRE1,MYC,PRMT2,RPL24,TP53
	GO:BP	regulation of kinase activity	GO:0043549	FALSE	6.94918e-05	4.15807	775	81	16	21128	ACTB,AKT1,APP,DNAJA1,EEF1A2,EGFR,HSP90AB1,HTT,LRRK2,MAPT,PIK3R1,PLEC,SFN,SIRT1,SNCA,YWHAG
	GO:BP	cellular component morphogenesis	GO:0032989	FALSE	0.00288844	2.53934	778	81	14	21128	ACTB,ACTG1,APP,BAIAP2,CNP,GSK3B,HDAC6,HSP90AB1,LRRK2,MAPT,PLEC,RPL24,TUBB3,YWHAH
	GO:BP	regulation of cellular catabolic process	GO:0031329	FALSE	2.52826e-12	11.5972	790	81	24	21128	AGO2,AKT1,APP,CCAR2,CSNK1A1,CSNK1D,EEF1A2,GSK3B,HAX1,HDAC6,HSP90AB1,HTT,LRRK2,MAPT,OPTN,PPP1CA,PRKACA,RPL23,SIRT1,SNCA,STUB1,TP53,VIM,VPS35
	GO:BP	brain development	GO:0007420	FALSE	0.0202157	1.69431	795	81	13	21128	ACTB,APP,BAIAP2,CNP,CSNK1D,EGFR,GSK3B,LRRK2,SETD1A,TP53,YWHAE,YWHAH,YWHAQ
	GO:BP	proteolysis involved in protein catabolic process	GO:0051603	FALSE	1.54588e-05	4.81083	799	81	17	21128	AKT1,BAG2,CCAR2,CSNK1A1,CSNK1D,CYLD,DDB1,GSK3B,HDAC6,HSP90AB1,LRRK2,PRKACA,PSMD2,RPL23,SIRT1,SQSTM1,STUB1
	GO:BP	supramolecular fiber organization	GO:0097435	FALSE	0.000851826	3.06965	814	81	15	21128	ACTG1,APP,BAIAP2,CSNK1D,DYNC1H1,HAX1,HDAC6,HSP90AB1,HSPA8,MAPRE1,MAPT,PIK3R1,PLEC,SNCA,VIM
	GO:BP	positive regulation of phosphorylation	GO:0042327	FALSE	0.00549445	2.26008	822	81	14	21128	AKT1,APP,CSNK1D,EEF1A2,EGFR,HAX1,HDAC6,HSP90AB1,LRRK2,MAPT,SIRT1,SNCA,SQSTM1,TP53
	GO:BP	regulation of cell development	GO:0060284	FALSE	0.0319355	1.49573	830	81	13	21128	ACTB,AKT1,BAIAP2,GSK3B,HAX1,HDAC6,HSPA9,LRRK2,MAPT,MYC,PIK3R1,TP53,YWHAH
	GO:BP	head development	GO:0060322	FALSE	0.0380886	1.4192	844	81	13	21128	ACTB,APP,BAIAP2,CNP,CSNK1D,EGFR,GSK3B,LRRK2,SETD1A,TP53,YWHAE,YWHAH,YWHAQ
	GO:BP	regulation of protein localization	GO:0032880	FALSE	1.2284e-08	7.91066	854	81	21	21128	ACTB,AKT1,CCT3,CCT5,CCT6A,CCT8,DNAJA1,EGFR,GSK3B,HAX1,HDAC6,HSP90AB1,HSPA8,LRRK2,MAPT,PIK3R1,PRKACA,SFN,SQSTM1,VPS35,YWHAE
	GO:BP	response to hormone	GO:0009725	FALSE	0.0469453	1.32841	861	81	13	21128	AKT1,BAIAP2,DNAJA1,GSK3B,HDAC6,HSPA8,PIK3R1,PKM,PRKACA,PRMT2,SIRT1,YWHAG,YWHAH
	GO:BP	negative regulation of apoptotic process	GO:0043066	FALSE	9.76373e-06	5.01038	881	81	18	21128	AKT1,CCAR2,DDB1,DNAJA1,EGFR,GSK3B,HAX1,HSP90AB1,HSPA9,HTT,LRRK2,MYC,PIK3R1,SFN,SIRT1,SNCA,TP53,YWHAZ
	GO:BP	negative regulation of programmed cell death	GO:0043069	FALSE	1.36117e-05	4.86609	900	81	18	21128	AKT1,CCAR2,DDB1,DNAJA1,EGFR,GSK3B,HAX1,HSP90AB1,HSPA9,HTT,LRRK2,MYC,PIK3R1,SFN,SIRT1,SNCA,TP53,YWHAZ
	GO:BP	positive regulation of transport	GO:0051050	FALSE	0.0165845	1.7803	905	81	14	21128	ACTB,AKT1,DYNC1H1,GSK3B,HSP90AB1,HTT,LRRK2,PIK3R1,PRKACA,SFN,SIRT1,SNCA,VPS35,YWHAE
	GO:BP	amide biosynthetic process	GO:0043604	FALSE	0.00321607	2.49267	905	81	15	21128	AGO2,AKT1,APP,EEF1A2,MYC,PKM,PPP1CA,RPL13,RPL23,RPL24,RPS11,RPS14,SNCA,TUFM,VIM
	GO:BP	positive regulation of phosphate metabolic process	GO:0045937	FALSE	0.0170051	1.76942	907	81	14	21128	AKT1,APP,CSNK1D,EEF1A2,EGFR,HAX1,HDAC6,HSP90AB1,LRRK2,MAPT,SIRT1,SNCA,SQSTM1,TP53
	GO:BP	positive regulation of phosphorus metabolic process	GO:0010562	FALSE	0.0170051	1.76942	907	81	14	21128	AKT1,APP,CSNK1D,EEF1A2,EGFR,HAX1,HDAC6,HSP90AB1,LRRK2,MAPT,SIRT1,SNCA,SQSTM1,TP53
	GO:BP	regulation of transferase activity	GO:0051338	FALSE	4.62059e-09	8.3353	908	81	22	21128	ACTB,AKT1,APP,BAG2,DNAJA1,EEF1A2,EGFR,GSK3B,HSP90AB1,HTT,LRRK2,MAPT,MYC,PIK3R1,PLEC,RPL23,SFN,SIRT1,SNCA,STUB1,TP53,YWHAG
	GO:BP	peptide metabolic process	GO:0006518	FALSE	0.0214992	1.66758	926	81	14	21128	AGO2,AKT1,APP,EEF1A2,MYC,PKM,PPP1CA,RPL13,RPL23,RPL24,RPS11,RPS14,TUFM,VIM
	GO:BP	mitotic cell cycle	GO:0000278	FALSE	4.57654e-07	6.33946	929	81	20	21128	ACTB,AKT1,APP,CYLD,DCTN2,DDB1,DYNC1H1,EGFR,HTT,MAPRE1,MYC,PRMT2,RPL24,SIRT1,TP53,TUBA1A,TUBB,TUBB3,TUBB4B,YWHAE
	GO:BP	growth	GO:0040007	FALSE	0.0046843	2.32935	933	81	15	21128	AKT1,APP,ATN1,CAMK2D,CCAR2,EGFR,GSK3B,HDAC6,HSP90AB1,MAPT,PLEC,PRMT2,SFN,SIRT1,TP53
	GO:BP	response to organic cyclic compound	GO:0014070	FALSE	0.000866947	3.06201	933	81	16	21128	ACTB,APP,DNAJA1,EGFR,GSK3B,HDAC6,HSP90AB1,HSPA8,LRRK2,PPP2R2A,PRKACA,PRMT2,SIRT1,SNCA,VPS35,YWHAH
	GO:BP	microtubule-based process	GO:0007017	FALSE	3.93726e-06	5.40481	939	81	19	21128	APP,CNP,CSNK1D,CYLD,DCTN2,DNAJA1,DYNC1H1,GSK3B,HDAC6,HSPA8,HTT,MAPRE1,MAPT,SIRT1,SNCA,TUBA1A,TUBB,TUBB3,TUBB4B
	GO:BP	organelle assembly	GO:0070925	FALSE	0.0266991	1.5735	944	81	14	21128	ACTG1,CSNK1D,CYLD,DYNC1H1,GSK3B,HDAC6,HTT,LRRK2,MAPRE1,MAPT,PLEC,RPL24,RPS14,TUBB
	GO:BP	regulation of cellular component biogenesis	GO:0044087	FALSE	5.19817e-06	5.28415	955	81	19	21128	ACTG1,APP,BAIAP2,CYLD,DYNC1H1,GSK3B,HAX1,HDAC6,HSPA8,HTT,LRRK2,MAPRE1,MAPT,PIK3R1,PRKACA,SNCA,STUB1,TP53,VPS35
	GO:BP	regulation of cellular localization	GO:0060341	FALSE	1.74823e-09	8.7574	963	81	23	21128	ACTB,AKT1,CAMK2D,CCT3,CCT5,CCT6A,CCT8,DNAJA1,DYNC1H1,EGFR,GSK3B,HAX1,HDAC6,HSP90AB1,HSPA8,LRRK2,MAPT,PIK3R1,PRKACA,SFN,SQSTM1,VPS35,YWHAE
	GO:BP	cell morphogenesis	GO:0000902	FALSE	0.0341514	1.46659	965	81	14	21128	ACTB,APP,BAIAP2,CNP,EGFR,GSK3B,HDAC6,HSP90AB1,LRRK2,MAPT,PLEC,RPL24,TUBB3,YWHAH
	GO:BP	neuron projection development	GO:0031175	FALSE	0.0387465	1.41177	976	81	14	21128	ACTB,AKT1,APP,BAIAP2,CNP,GSK3B,HDAC6,HSP90AB1,LRRK2,MAPT,RPL24,TUBB3,VIM,YWHAH
	GO:BP	regulation of catabolic process	GO:0009894	TRUE	3.2869e-15	14.4832	992	81	29	21128	AGO2,AKT1,APP,BAG2,BANP,CCAR2,CSNK1A1,CSNK1D,DDB1,EEF1A2,EGFR,GSK3B,HAX1,HDAC6,HSP90AB1,HTT,LRRK2,MAPT,OPTN,PPP1CA,PRKACA,PSMD2,RPL23,SIRT1,SNCA,STUB1,TP53,VIM,VPS35
	GO:BP	negative regulation of cell death	GO:0060548	FALSE	1.12147e-05	4.95021	1001	81	19	21128	AKT1,CCAR2,DDB1,DNAJA1,EGFR,GSK3B,HAX1,HSP90AB1,HSPA9,HTT,LRRK2,MYC,PIK3R1,SFN,SIRT1,SNCA,TP53,VPS35,YWHAZ
	GO:BP	cellular macromolecule catabolic process	GO:0044265	FALSE	0.000608288	3.21589	1030	81	17	21128	AGO2,AKT1,CCAR2,CSNK1A1,CSNK1D,CYLD,DDB1,GSK3B,HDAC6,HSP90AB1,LRRK2,PSMD2,RPL23,SIRT1,SQSTM1,STUB1,VIM
	GO:BP	protein catabolic process	GO:0030163	FALSE	7.09137e-09	8.14927	1031	81	23	21128	AKT1,BAG2,BANP,CCAR2,CSNK1A1,CSNK1D,CYLD,DDB1,EEF1A2,EGFR,GSK3B,HDAC6,HSP90AB1,HSPA8,LRRK2,PRKACA,PSMD2,RPL23,SIRT1,SNCA,SQSTM1,STUB1,VPS35
	GO:BP	negative regulation of protein metabolic process	GO:0051248	FALSE	9.72924e-11	10.0119	1031	81	25	21128	AGO2,AKT1,APP,BAG2,BANP,CCAR2,CSTA,DNAJA1,EGFR,GSK3B,HDAC6,HSP90AB1,LRRK2,MAPT,PLEC,RPL23,SFN,SIRT1,SNCA,SQSTM1,TP53,VPS35,YWHAB,YWHAE,YWHAG
	GO:BP	response to organonitrogen compound	GO:0010243	FALSE	4.28775e-07	6.36777	1034	81	21	21128	ACTB,AKT1,APP,BAIAP2,EGFR,GSK3B,HDAC6,HSP90AB1,LRRK2,PIK3R1,PKM,PPP2R2A,PRKACA,RPL23,SIRT1,SNCA,STUB1,TP53,VIM,VPS35,YWHAG
	GO:BP	positive regulation of cellular component organization	GO:0051130	FALSE	2.66535e-05	4.57425	1056	81	19	21128	APP,BAIAP2,CCT3,CCT5,CCT6A,CCT8,DYNC1H1,GSK3B,HAX1,HDAC6,HTT,LRRK2,MAPRE1,MAPT,PIK3R1,SNCA,STUB1,TP53,VPS35
	GO:BP	central nervous system development	GO:0007417	FALSE	0.000235708	3.62763	1085	81	18	21128	ACTB,APP,ATN1,BAIAP2,CNP,CSNK1D,EGFR,GSK3B,HSP90AB1,LRRK2,MAPT,SETD1A,SH3GL1,TP53,VIM,YWHAE,YWHAH,YWHAQ
	GO:BP	intracellular protein transport	GO:0006886	FALSE	1.76549e-07	6.75313	1095	81	22	21128	AKT1,GSK3B,HAX1,HDAC6,HSP90AB1,HSPA4,HSPA8,HSPA9,LRRK2,PIK3R1,PRKACA,RPL23,SFN,SQSTM1,TP53,VPS35,YWHAB,YWHAE,YWHAG,YWHAH,YWHAQ,YWHAZ
	GO:BP	regulation of protein phosphorylation	GO:0001932	FALSE	0.000293264	3.53274	1101	81	18	21128	ACTB,AKT1,APP,CSNK1D,DNAJA1,EGFR,HAX1,HDAC6,HSP90AB1,HTT,LRRK2,PLEC,SFN,SIRT1,SNCA,SQSTM1,TP53,YWHAG
	GO:BP	negative regulation of molecular function	GO:0044092	FALSE	5.63295e-10	9.24926	1115	81	25	21128	ACTB,AKT1,APP,BAG2,CAMK2D,CCAR2,CSTA,CYLD,DNAJA1,GSK3B,HDAC6,LRRK2,MAPT,PLEC,PPP1CA,PRMT2,RPL23,SFN,SIRT1,SNCA,STUB1,TP53,YWHAB,YWHAE,YWHAG
	GO:BP	response to nitrogen compound	GO:1901698	FALSE	1.91803e-06	5.71714	1123	81	21	21128	ACTB,AKT1,APP,BAIAP2,EGFR,GSK3B,HDAC6,HSP90AB1,LRRK2,PIK3R1,PKM,PPP2R2A,PRKACA,RPL23,SIRT1,SNCA,STUB1,TP53,VIM,VPS35,YWHAG
	GO:BP	regulation of cell cycle	GO:0051726	FALSE	7.22962e-05	4.14088	1124	81	19	21128	ACTB,AKT1,APP,CCAR2,CYLD,DDB1,DYNC1H1,EGFR,HSP90AB1,HSPA8,MYC,PRKACA,PRMT2,RPL23,SFN,SGF29,SIRT1,TP53,YWHAE
	GO:BP	neuron development	GO:0048666	FALSE	0.0465745	1.33185	1130	81	15	21128	ACTB,AKT1,APP,BAIAP2,CNP,GSK3B,HDAC6,HSP90AB1,LRRK2,MAPT,RPL24,TUBB3,VIM,YWHAH,YWHAZ
	GO:BP	response to abiotic stimulus	GO:0009628	FALSE	2.55261e-06	5.59302	1141	81	21	21128	ACTG1,AKT1,APP,CCAR2,CREBBP,DDB1,DNAJA1,EGFR,GSK3B,HSP90AB1,HTT,MAPT,MYC,PIK3R1,PLEC,PPP1CA,PRKACA,SIRT1,STUB1,TP53,YWHAE
	GO:BP	protein localization to organelle	GO:0033365	FALSE	1.19714e-10	9.92185	1144	81	26	21128	AKT1,BANP,CCT3,CCT5,CCT6A,CCT8,CSNK1D,DCTN2,DNAJA1,GSK3B,HAX1,HSP90AB1,HSPA4,HSPA8,LRRK2,MAPRE1,MAPT,OPTN,PIK3R1,PRKACA,RPL23,SGF29,SQSTM1,TP53,VPS35,YWHAE
	GO:BP	positive regulation of gene expression	GO:0010628	FALSE	0.000659806	3.18058	1163	81	18	21128	ACTG1,AGO2,AKT1,APP,BAG2,EDA,EGFR,GSK3B,HSPA8,LRRK2,MYC,PIK3R1,PKM,RPL23,SIRT1,TP53,VIM,VPS35
	GO:BP	regulation of organelle organization	GO:0033043	FALSE	1.25927e-07	6.89988	1189	81	23	21128	ACTB,ACTG1,AKT1,BAIAP2,CCT3,CCT5,CCT6A,CCT8,CYLD,DYNC1H1,GSK3B,HAX1,HDAC6,HTT,LRRK2,MAPRE1,MAPT,MYC,PIK3R1,SNCA,SQSTM1,TP53,VPS35
	GO:BP	cellular response to oxygen-containing compound	GO:1901701	FALSE	3.24959e-05	4.48817	1191	81	20	21128	ACTB,AKT1,APP,BAIAP2,EGFR,GSK3B,HDAC6,LRRK2,MAPT,PIK3R1,PKM,PLEC,PRKACA,RPL23,SIRT1,SNCA,TP53,VIM,VPS35,YWHAG
	GO:BP	amide metabolic process	GO:0043603	FALSE	0.0233937	1.6309	1204	81	16	21128	AGO2,AKT1,APP,EEF1A2,MYC,PKM,PPP1CA,RPL13,RPL23,RPL24,RPS11,RPS14,SNCA,TP53,TUFM,VIM
	GO:BP	regulation of phosphorylation	GO:0042325	FALSE	1.18747e-05	4.92538	1244	81	21	21128	ACTB,AKT1,APP,CSNK1D,DNAJA1,EEF1A2,EGFR,HAX1,HDAC6,HSP90AB1,HTT,LRRK2,MAPT,PIK3R1,PLEC,SFN,SIRT1,SNCA,SQSTM1,TP53,YWHAG
	GO:BP	negative regulation of signal transduction	GO:0009968	FALSE	0.00850127	2.07052	1248	81	17	21128	AKT1,CCAR2,CSNK1A1,CYLD,DNAJA1,EGFR,GSK3B,HTT,LRRK2,MYC,OPTN,PRKACA,SIRT1,SNCA,STUB1,TP53,YWHAB
	GO:BP	peptidyl-amino acid modification	GO:0018193	FALSE	1.44602e-05	4.83983	1258	81	21	21128	ACTB,AKT1,APP,CAMK2D,CREBBP,CSNK1A1,CSNK1D,EGFR,GSK3B,HAX1,HDAC6,HSP90AB1,LRRK2,PKM,PRKACA,PRMT2,SETD1A,SGF29,SIRT1,SNCA,TP53
	GO:BP	cell cycle process	GO:0022402	FALSE	0.00048908	3.31062	1270	81	19	21128	ACTB,AKT1,APP,CCAR2,CSNK1D,DCTN2,DDB1,DYNC1H1,EGFR,HTT,MAPRE1,MYC,PLEC,PRMT2,RPL23,RPL24,SIRT1,TP53,TUBB
	GO:BP	negative regulation of cell communication	GO:0010648	FALSE	0.00128741	2.89028	1353	81	19	21128	AKT1,CCAR2,CSNK1A1,CYLD,DNAJA1,EGFR,GSK3B,HSP90AB1,HTT,LRRK2,MAPT,MYC,OPTN,PRKACA,SIRT1,SNCA,STUB1,TP53,YWHAB
	GO:BP	negative regulation of signaling	GO:0023057	FALSE	0.00128741	2.89028	1353	81	19	21128	AKT1,CCAR2,CSNK1A1,CYLD,DNAJA1,EGFR,GSK3B,HSP90AB1,HTT,LRRK2,MAPT,MYC,OPTN,PRKACA,SIRT1,SNCA,STUB1,TP53,YWHAB
	GO:BP	organonitrogen compound catabolic process	GO:1901565	FALSE	4.22575e-07	6.3741	1386	81	24	21128	AKT1,BAG2,BANP,CCAR2,CSNK1A1,CSNK1D,CYLD,DDB1,ECHS1,EEF1A2,EGFR,GSK3B,HDAC6,HSP90AB1,HSPA8,LRRK2,PRKACA,PSMD2,RPL23,SIRT1,SNCA,SQSTM1,STUB1,VPS35
	GO:BP	macromolecule catabolic process	GO:0009057	FALSE	1.05565e-08	7.97648	1391	81	26	21128	AGO2,AKT1,BAG2,BANP,CCAR2,CSNK1A1,CSNK1D,CYLD,DDB1,EEF1A2,EGFR,GSK3B,HDAC6,HSP90AB1,HSPA8,LRRK2,PPP1CA,PRKACA,PSMD2,RPL23,SIRT1,SNCA,SQSTM1,STUB1,VIM,VPS35
	GO:BP	regulation of phosphate metabolic process	GO:0019220	FALSE	5.18588e-07	6.28518	1400	81	24	21128	ACTB,AKT1,APP,CSNK1D,DNAJA1,EEF1A2,EGFR,GSK3B,HAX1,HDAC6,HSP90AB1,HTT,LRRK2,MAPT,PIK3R1,PLEC,SFN,SIRT1,SNCA,SQSTM1,TP53,YWHAB,YWHAE,YWHAG
	GO:BP	neuron differentiation	GO:0030182	FALSE	0.0388416	1.4107	1401	81	17	21128	ACTB,AKT1,APP,BAIAP2,CNP,CSNK1D,GSK3B,HDAC6,HSP90AB1,LRRK2,MAPT,RPL24,TUBB3,VIM,YWHAG,YWHAH,YWHAZ
	GO:BP	regulation of phosphorus metabolic process	GO:0051174	FALSE	5.26178e-07	6.27887	1401	81	24	21128	ACTB,AKT1,APP,CSNK1D,DNAJA1,EEF1A2,EGFR,GSK3B,HAX1,HDAC6,HSP90AB1,HTT,LRRK2,MAPT,PIK3R1,PLEC,SFN,SIRT1,SNCA,SQSTM1,TP53,YWHAB,YWHAE,YWHAG
	GO:BP	regulation of response to stress	GO:0080134	FALSE	0.000151566	3.8194	1441	81	21	21128	ACTB,ACTG1,AKT1,APP,CCAR2,CREBBP,CYLD,DNAJA1,EGFR,GSK3B,HDAC6,LRRK2,MAPT,MYC,OPTN,PIK3R1,SGF29,SIRT1,SNCA,TP53,VPS35
	GO:BP	cellular response to endogenous stimulus	GO:0071495	FALSE	3.6225e-09	8.44099	1445	81	27	21128	ACTB,AKT1,APP,BAIAP2,CREBBP,CSNK1D,DNAJA1,EGFR,GSK3B,HDAC6,HSP90AB1,HSPA8,LRRK2,MAPT,PIK3R1,PKM,PRKACA,PRMT2,RPL23,SIRT1,SNCA,STUB1,TP53,VIM,VPS35,YWHAG,YWHAH
	GO:BP	regulation of apoptotic process	GO:0042981	FALSE	1.83605e-07	6.73612	1454	81	25	21128	ACTB,AKT1,CAMK2D,CCAR2,CYLD,DDB1,DNAJA1,EEF1A2,EGFR,GSK3B,HAX1,HSP90AB1,HSPA9,HTT,LRRK2,MYC,PIK3R1,PPP1CA,PRMT2,SFN,SIRT1,SNCA,SQSTM1,TP53,YWHAZ
	GO:BP	generation of neurons	GO:0048699	FALSE	0.00459296	2.33791	1473	81	19	21128	ACTB,AKT1,APP,BAIAP2,CNP,CSNK1D,GSK3B,HDAC6,HSP90AB1,LRRK2,MAPT,RPL24,TP53,TUBB3,VIM,YWHAE,YWHAG,YWHAH,YWHAZ
	GO:BP	regulation of programmed cell death	GO:0043067	FALSE	4.42993e-08	7.3536	1483	81	26	21128	ACTB,AKT1,CAMK2D,CCAR2,CYLD,DDB1,DNAJA1,EEF1A2,EGFR,GSK3B,HAX1,HDAC6,HSP90AB1,HSPA9,HTT,LRRK2,MYC,PIK3R1,PPP1CA,PRMT2,SFN,SIRT1,SNCA,SQSTM1,TP53,YWHAZ
	GO:BP	positive regulation of protein metabolic process	GO:0051247	FALSE	5.99619e-05	4.22212	1499	81	22	21128	AKT1,APP,BAG2,CSNK1A1,CSNK1D,DDB1,EGFR,GSK3B,HAX1,HDAC6,HSP90AB1,LRRK2,MAPT,MYC,PKM,SIRT1,SNCA,SQSTM1,STUB1,TP53,VIM,VPS35
	GO:BP	cytoskeleton organization	GO:0007010	FALSE	2.29386e-06	5.63943	1507	81	24	21128	ACTB,ACTG1,BAIAP2,CNP,CSNK1A1,CSNK1D,CYLD,DCTN2,DYNC1H1,GSK3B,HAX1,HDAC6,HTT,MAPRE1,MAPT,PIK3R1,PLEC,SIRT1,SNCA,TUBA1A,TUBB,TUBB3,TUBB4B,VIM
	GO:BP	plasma membrane bounded cell projection organization	GO:0120036	FALSE	0.00166796	2.77781	1518	81	20	21128	ACTB,AKT1,APP,BAIAP2,CNP,CSNK1D,CYLD,GSK3B,HDAC6,HSP90AB1,HTT,LRRK2,MAPRE1,MAPT,PIK3R1,RPL24,TUBB3,VIM,VPS35,YWHAH
	GO:BP	positive regulation of signal transduction	GO:0009967	FALSE	0.00786905	2.10408	1528	81	19	21128	APP,BAIAP2,CCAR2,CREBBP,CSNK1D,CYLD,EDA,EGFR,HAX1,HSP90AB1,HTT,LRRK2,MYC,PIK3R1,PPP1CA,RPL23,SIRT1,TP53,VPS35
	GO:BP	regulation of protein modification process	GO:0031399	FALSE	2.36555e-09	8.62607	1540	81	28	21128	ACTB,AKT1,APP,BAG2,CAMK2D,CCAR2,CSNK1D,DNAJA1,EGFR,GSK3B,HAX1,HDAC6,HSP90AB1,HTT,LRRK2,MAPT,PLEC,RPL23,SFN,SGF29,SIRT1,SNCA,SQSTM1,STUB1,TP53,YWHAB,YWHAE,YWHAG
	GO:BP	cell projection organization	GO:0030030	FALSE	0.00245521	2.60991	1556	81	20	21128	ACTB,AKT1,APP,BAIAP2,CNP,CSNK1D,CYLD,GSK3B,HDAC6,HSP90AB1,HTT,LRRK2,MAPRE1,MAPT,PIK3R1,RPL24,TUBB3,VIM,VPS35,YWHAH
	GO:BP	regulation of cell differentiation	GO:0045595	FALSE	0.000132031	3.87932	1567	81	22	21128	ACTB,AKT1,APP,BAIAP2,CSNK1D,EGFR,GSK3B,HAX1,HDAC6,HSP90AB1,HSPA9,LRRK2,MAPT,MYC,PIK3R1,PRKACA,SETD1A,SFN,SIRT1,TP53,YWHAG,YWHAH
	GO:BP	protein phosphorylation	GO:0006468	FALSE	9.39039e-07	6.02732	1571	81	25	21128	ACTB,AKT1,APP,CAMK2D,CSNK1A1,CSNK1D,DNAJA1,EGFR,GSK3B,HAX1,HDAC6,HSP90AB1,HTT,LRRK2,PIK3R1,PKM,PLEC,PRKACA,SFN,SIRT1,SNCA,SQSTM1,TP53,YWHAG,YWHAZ
	GO:BP	negative regulation of response to stimulus	GO:0048585	FALSE	0.0169155	1.77172	1611	81	19	21128	AKT1,CCAR2,CSNK1A1,CYLD,DNAJA1,EGFR,GSK3B,HDAC6,HTT,LRRK2,MYC,OPTN,PRKACA,SIRT1,SNCA,STUB1,TP53,VPS35,YWHAB
	GO:BP	regulation of cell death	GO:0010941	FALSE	1.04699e-08	7.98006	1638	81	28	21128	ACTB,AKT1,CAMK2D,CCAR2,CYLD,DDB1,DNAJA1,EEF1A2,EGFR,GSK3B,HAX1,HDAC6,HSP90AB1,HSPA9,HTT,LRRK2,MAPT,MYC,PIK3R1,PPP1CA,PRMT2,SFN,SIRT1,SNCA,SQSTM1,TP53,VPS35,YWHAZ
	GO:BP	response to oxygen-containing compound	GO:1901700	FALSE	8.17971e-05	4.08726	1665	81	23	21128	ACTB,AKT1,APP,BAIAP2,CNP,EGFR,GSK3B,HDAC6,HSP90AB1,LRRK2,MAPT,PIK3R1,PKM,PLEC,PRKACA,RPL23,SIRT1,SNCA,TP53,TUFM,VIM,VPS35,YWHAG
	GO:BP	cell-cell signaling	GO:0007267	FALSE	8.27085e-05	4.08245	1666	81	23	21128	AKT1,APP,BAIAP2,CCAR2,CNP,CSNK1A1,CSNK1D,CYLD,DDB1,EDA,EGFR,GSK3B,HDAC6,HSP90AB1,LRRK2,MAPT,PPP1CA,PRKACA,SNCA,SQSTM1,VPS35,YWHAG,YWHAH
	GO:BP	neurogenesis	GO:0022008	FALSE	0.00858236	2.06639	1688	81	20	21128	ACTB,AKT1,APP,BAIAP2,CNP,CSNK1D,GSK3B,HDAC6,HSP90AB1,LRRK2,MAPT,PLEC,RPL24,TP53,TUBB3,VIM,YWHAE,YWHAG,YWHAH,YWHAZ
	GO:BP	response to endogenous stimulus	GO:0009719	FALSE	2.27206e-08	7.64358	1692	81	28	21128	ACTB,AKT1,APP,BAIAP2,CREBBP,CSNK1D,DNAJA1,EGFR,GSK3B,HDAC6,HSP90AB1,HSPA8,LRRK2,MAPT,MYC,PIK3R1,PKM,PRKACA,PRMT2,RPL23,SIRT1,SNCA,STUB1,TP53,VIM,VPS35,YWHAG,YWHAH
	GO:BP	positive regulation of DNA-templated transcription	GO:0045893	FALSE	0.0371966	1.4295	1703	81	19	21128	ACTB,AGO2,AKT1,APP,ATN1,BANP,CCAR2,CREBBP,EGFR,HAX1,MYC,PIK3R1,PRMT2,SGF29,SIRT1,SQSTM1,TP53,UBTF,YWHAH
	GO:BP	positive regulation of nucleic acid-templated transcription	GO:1903508	FALSE	0.0371966	1.4295	1703	81	19	21128	ACTB,AGO2,AKT1,APP,ATN1,BANP,CCAR2,CREBBP,EGFR,HAX1,MYC,PIK3R1,PRMT2,SGF29,SIRT1,SQSTM1,TP53,UBTF,YWHAH
	GO:BP	positive regulation of RNA biosynthetic process	GO:1902680	FALSE	0.0393999	1.40451	1710	81	19	21128	ACTB,AGO2,AKT1,APP,ATN1,BANP,CCAR2,CREBBP,EGFR,HAX1,MYC,PIK3R1,PRMT2,SGF29,SIRT1,SQSTM1,TP53,UBTF,YWHAH
	GO:BP	regulation of intracellular signal transduction	GO:1902531	FALSE	0.0119065	1.92422	1725	81	20	21128	AKT1,APP,CCAR2,CYLD,DNAJA1,EDA,EGFR,GSK3B,HAX1,HSP90AB1,HTT,LRRK2,MAPT,MYC,OPTN,RPL23,SIRT1,SQSTM1,TP53,YWHAZ
	GO:BP	positive regulation of signaling	GO:0023056	FALSE	0.000160062	3.79571	1727	81	23	21128	APP,BAIAP2,CCAR2,CREBBP,CSNK1D,CYLD,EDA,EGFR,GSK3B,HAX1,HDAC6,HSP90AB1,HTT,LRRK2,MYC,PIK3R1,PPP1CA,RPL23,SIRT1,SNCA,SQSTM1,TP53,VPS35
	GO:BP	positive regulation of cell communication	GO:0010647	FALSE	0.000163481	3.78653	1729	81	23	21128	APP,BAIAP2,CCAR2,CREBBP,CSNK1D,CYLD,EDA,EGFR,GSK3B,HAX1,HDAC6,HSP90AB1,HTT,LRRK2,MYC,PIK3R1,PPP1CA,RPL23,SIRT1,SNCA,SQSTM1,TP53,VPS35
	GO:BP	regulation of transport	GO:0051049	FALSE	0.00390666	2.40819	1754	81	21	21128	ACTB,ACTG1,AKT1,APP,CAMK2D,DNAJA1,DYNC1H1,GSK3B,HAX1,HSP90AB1,HSPA8,HTT,LRRK2,PIK3R1,PRKACA,SFN,SIRT1,SNCA,VPS35,YWHAE,YWHAH
	GO:BP	proteolysis	GO:0006508	FALSE	1.33196e-05	4.87551	1787	81	25	21128	AKT1,APP,BAG2,CCAR2,CSNK1A1,CSNK1D,CSTA,CYLD,DDB1,GSK3B,HDAC6,HSP90AB1,LRRK2,MAPT,MYC,PRKACA,PSMD2,RPL23,SFN,SGF29,SIRT1,SNCA,SQSTM1,STUB1,TP53
	GO:BP	protein transport	GO:0015031	FALSE	6.55078e-05	4.18371	1788	81	24	21128	AKT1,DNAJA1,GSK3B,HAX1,HDAC6,HSP90AB1,HSPA4,HSPA8,HSPA9,LRRK2,OPTN,PIK3R1,PRKACA,RPL23,SFN,SQSTM1,TP53,VPS35,YWHAB,YWHAE,YWHAG,YWHAH,YWHAQ,YWHAZ
	GO:BP	intracellular transport	GO:0046907	FALSE	2.80458e-09	8.55213	1806	81	30	21128	AKT1,APP,CNP,CSNK1D,DYNC1H1,GSK3B,HAX1,HDAC6,HSP90AB1,HSPA4,HSPA8,HSPA9,HTT,LRRK2,MAPT,PIK3R1,PRKACA,RPL23,SFN,SQSTM1,TP53,TUBA1A,TUBB,VPS35,YWHAB,YWHAE,YWHAG,YWHAH,YWHAQ,YWHAZ
	GO:BP	cell cycle	GO:0007049	FALSE	7.23319e-11	10.1407	1818	81	32	21128	ACTB,AKT1,APP,BANP,CCAR2,CSNK1A1,CSNK1D,CYLD,DCTN2,DDB1,DYNC1H1,EGFR,HSP90AB1,HSPA8,HTT,MAPRE1,MYC,PLEC,PPP1CA,PRKACA,PRMT2,RPL23,RPL24,SFN,SGF29,SIRT1,TP53,TUBA1A,TUBB,TUBB3,TUBB4B,YWHAE
	GO:BP	positive regulation of RNA metabolic process	GO:0051254	FALSE	0.031813	1.4974	1843	81	20	21128	ACTB,AGO2,AKT1,APP,ATN1,BANP,CCAR2,CREBBP,EGFR,HAX1,HSPA8,MYC,PIK3R1,PRMT2,SGF29,SIRT1,SQSTM1,TP53,UBTF,YWHAH
	GO:BP	phosphorylation	GO:0016310	FALSE	1.34088e-06	5.87261	1872	81	27	21128	ACTB,AKT1,APP,CAMK2D,CSNK1A1,CSNK1D,DNAJA1,EEF1A2,EGFR,GSK3B,HAX1,HDAC6,HSP90AB1,HTT,LRRK2,MAPT,PIK3R1,PKM,PLEC,PRKACA,SFN,SIRT1,SNCA,SQSTM1,TP53,YWHAG,YWHAZ
	GO:BP	apoptotic process	GO:0006915	FALSE	5.66639e-08	7.24669	1894	81	29	21128	ACTB,AKT1,APP,ATN1,CAMK2D,CCAR2,CYLD,DDB1,DNAJA1,EEF1A2,EGFR,GSK3B,HAX1,HSP90AB1,HSPA9,HTT,LRRK2,MYC,PIK3R1,PPP1CA,PPP2R2B,PRMT2,SFN,SIRT1,SNCA,SQSTM1,TP53,VPS35,YWHAZ
	GO:BP	establishment of protein localization	GO:0045184	FALSE	1.583e-09	8.80052	1898	81	31	21128	AKT1,CCT3,CCT5,CCT6A,CCT8,DNAJA1,EGFR,GSK3B,HAX1,HDAC6,HSP90AB1,HSPA4,HSPA8,HSPA9,LRRK2,MAPT,OPTN,PIK3R1,PRKACA,RPL23,SFN,SGF29,SQSTM1,TP53,VPS35,YWHAB,YWHAE,YWHAG,YWHAH,YWHAQ,YWHAZ
	GO:BP	positive regulation of macromolecule biosynthetic process	GO:0010557	FALSE	2.66126e-06	5.57491	1931	81	27	21128	ACTB,AGO2,AKT1,APP,ATN1,BANP,CCAR2,CCT3,CCT5,CCT6A,CCT8,CREBBP,EGFR,HAX1,HSP90AB1,LRRK2,MYC,PIK3R1,PKM,PRMT2,SGF29,SIRT1,SQSTM1,TP53,UBTF,VIM,YWHAH
	GO:BP	cellular response to stress	GO:0033554	FALSE	2.86244e-09	8.54326	1941	81	31	21128	ACTB,AKT1,APP,CCAR2,CREBBP,CYLD,DDB1,DNAJA1,EGFR,GSK3B,HDAC6,HSP90AB1,HSPA8,HSPA9,LRRK2,MAPT,MYC,OPTN,PIK3R1,PLEC,PPP1CA,PRKACA,SETD1A,SFN,SGF29,SIRT1,SNCA,SQSTM1,STUB1,TP53,YWHAE
	GO:BP	programmed cell death	GO:0012501	FALSE	3.14748e-09	8.50204	1948	81	31	21128	ACTB,AKT1,APP,ATN1,CAMK2D,CCAR2,CYLD,DDB1,DNAJA1,EEF1A2,EGFR,GSK3B,HAX1,HDAC6,HSP90AB1,HSPA9,HTT,LRRK2,MYC,PIK3R1,PKM,PPP1CA,PPP2R2B,PRMT2,SFN,SIRT1,SNCA,SQSTM1,TP53,VPS35,YWHAZ
	GO:BP	cellular response to organic substance	GO:0071310	FALSE	1.94103e-07	6.71197	1993	81	29	21128	ACTB,ACTG1,AKT1,APP,BAIAP2,CYLD,DNAJA1,EGFR,GSK3B,HAX1,HDAC6,HSP90AB1,HSPA8,HSPA9,LRRK2,OPTN,PIK3R1,PKM,PRKACA,PRMT2,RPL23,SIRT1,SNCA,STUB1,TP53,VIM,VPS35,YWHAG,YWHAH
	GO:BP	positive regulation of cellular biosynthetic process	GO:0031328	FALSE	3.275e-07	6.48479	2037	81	29	21128	ACTB,AGO2,AKT1,APP,ATN1,BANP,CCAR2,CCT3,CCT5,CCT6A,CCT8,CREBBP,DDB1,EGFR,HAX1,HSP90AB1,MYC,PIK3R1,PKM,PRMT2,SGF29,SIRT1,SNCA,SQSTM1,TP53,UBTF,VIM,VPS35,YWHAH
	GO:BP	positive regulation of nucleobase-containing compound metabolic process	GO:0045935	FALSE	0.000205416	3.68737	2051	81	25	21128	ACTB,AGO2,AKT1,APP,ATN1,BANP,CCAR2,CCT3,CCT5,CCT6A,CCT8,CREBBP,EGFR,HAX1,HSP90AB1,HSPA8,MYC,PIK3R1,PRMT2,SGF29,SIRT1,SQSTM1,TP53,UBTF,YWHAH
	GO:BP	positive regulation of biosynthetic process	GO:0009891	FALSE	9.61569e-08	7.01702	2077	81	30	21128	ACTB,AGO2,AKT1,APP,ATN1,BANP,CCAR2,CCT3,CCT5,CCT6A,CCT8,CREBBP,DDB1,EGFR,HAX1,HSP90AB1,LRRK2,MYC,PIK3R1,PKM,PRMT2,SGF29,SIRT1,SNCA,SQSTM1,TP53,UBTF,VIM,VPS35,YWHAH
	GO:BP	regulation of localization	GO:0032879	FALSE	6.83765e-07	6.16509	2101	81	29	21128	ACTB,ACTG1,AKT1,APP,CAMK2D,CCT3,CCT5,CCT6A,CCT8,DNAJA1,DYNC1H1,EGFR,GSK3B,HAX1,HDAC6,HSP90AB1,HSPA8,HTT,LRRK2,MAPT,PIK3R1,PRKACA,SFN,SIRT1,SNCA,SQSTM1,VPS35,YWHAE,YWHAH
	GO:BP	cell death	GO:0008219	FALSE	7.21641e-10	9.14168	2113	81	33	21128	ACTB,AKT1,APP,ATN1,CAMK2D,CCAR2,CYLD,DDB1,DNAJA1,EEF1A2,EGFR,GSK3B,HAX1,HDAC6,HSP90AB1,HSPA9,HTT,LRRK2,MAPT,MYC,OPTN,PIK3R1,PKM,PPP1CA,PPP2R2B,PRMT2,SFN,SIRT1,SNCA,SQSTM1,TP53,VPS35,YWHAZ
	GO:BP	cellular catabolic process	GO:0044248	FALSE	3.56911e-08	7.44744	2138	81	31	21128	AGO2,AKT1,APP,CCAR2,CNP,CSNK1A1,CSNK1D,CYLD,DDB1,ECHS1,EEF1A2,GSK3B,HAX1,HDAC6,HSP90AB1,HSPA8,HTT,LRRK2,MAPT,OPTN,PPP1CA,PRKACA,PSMD2,RPL23,SIRT1,SNCA,SQSTM1,STUB1,TP53,VIM,VPS35
	GO:BP	organic substance catabolic process	GO:1901575	FALSE	6.96206e-09	8.15726	2148	81	32	21128	AGO2,AKT1,APP,BAG2,BANP,CCAR2,CNP,CSNK1A1,CSNK1D,CYLD,DDB1,ECHS1,EEF1A2,EGFR,GSK3B,HDAC6,HSP90AB1,HSPA8,LRRK2,PKM,PPP1CA,PRKACA,PSMD2,RPL23,SIRT1,SNCA,SQSTM1,STUB1,TP53,VIM,VPS35,YWHAH
	GO:BP	negative regulation of cellular metabolic process	GO:0031324	FALSE	1.51375e-05	4.81995	2244	81	28	21128	AGO2,AKT1,ATN1,CCAR2,CREBBP,DNAJA1,GSK3B,HDAC6,HSP90AB1,HSPA8,LRRK2,MAPT,MYC,OPTN,PLEC,PRMT2,RPL23,RPS14,SFN,SIRT1,SNCA,SQSTM1,TP53,YWHAB,YWHAE,YWHAG,YWHAQ,YWHAZ
	GO:BP	nitrogen compound transport	GO:0071705	FALSE	0.000307639	3.51196	2252	81	26	21128	ACTB,AKT1,DNAJA1,GSK3B,HAX1,HDAC6,HSP90AB1,HSPA4,HSPA8,HSPA9,LRRK2,OPTN,PIK3R1,PRKACA,RPL23,SFN,SNCA,SQSTM1,TP53,VPS35,YWHAB,YWHAE,YWHAG,YWHAH,YWHAQ,YWHAZ
	GO:BP	positive regulation of response to stimulus	GO:0048584	FALSE	0.00521883	2.28243	2267	81	24	21128	ACTB,ACTG1,APP,BAIAP2,CCAR2,CREBBP,CSNK1D,CYLD,EDA,EGFR,HAX1,HDAC6,HSP90AB1,HTT,LRRK2,MYC,OPTN,PIK3R1,PPP1CA,RPL23,SIRT1,SNCA,TP53,VPS35
	GO:BP	establishment of localization in cell	GO:0051649	FALSE	5.40062e-11	10.2676	2340	81	36	21128	ACTB,ACTG1,AKT1,APP,CNP,CSNK1D,DCTN2,DYNC1H1,GSK3B,HAX1,HDAC6,HSP90AB1,HSPA4,HSPA8,HSPA9,HTT,LRRK2,MAPRE1,MAPT,PIK3R1,PRKACA,RPL23,SFN,SH3GL1,SNCA,SQSTM1,TP53,TUBA1A,TUBB,VPS35,YWHAB,YWHAE,YWHAG,YWHAH,YWHAQ,YWHAZ
	GO:BP	regulation of catalytic activity	GO:0050790	FALSE	2.10371e-06	5.67702	2356	81	30	21128	ACTB,AKT1,APP,BAG2,CAMK2D,CCAR2,CSTA,DNAJA1,EEF1A2,EGFR,GSK3B,HDAC6,HSP90AB1,HTT,LRRK2,MAPT,MYC,PIK3R1,PLEC,PPP2R2A,PPP2R2B,PSMD2,RPL23,SFN,SIRT1,SNCA,STUB1,TP53,YWHAB,YWHAG
	GO:BP	regulation of cellular component organization	GO:0051128	FALSE	1.60635e-12	11.7942	2365	81	38	21128	ACTB,ACTG1,AKT1,APP,BAIAP2,CAMK2D,CCAR2,CCT3,CCT5,CCT6A,CCT8,CYLD,DYNC1H1,EGFR,GSK3B,HAX1,HDAC6,HSPA8,HTT,LRRK2,MAPRE1,MAPT,MYC,PIK3R1,PRKACA,SETD1A,SFN,SIRT1,SNCA,SQSTM1,STUB1,TP53,TUBA1A,TUBB,VIM,VPS35,YWHAH,YWHAZ
	GO:BP	negative regulation of nitrogen compound metabolic process	GO:0051172	FALSE	2.49164e-08	7.60351	2401	81	33	21128	AGO2,AKT1,APP,ATN1,BAG2,BANP,CCAR2,CREBBP,CSTA,DNAJA1,EGFR,GSK3B,HDAC6,HSP90AB1,HSPA8,LRRK2,MAPT,MYC,PLEC,PRMT2,RPL23,RPS14,SFN,SIRT1,SNCA,SQSTM1,TP53,VPS35,YWHAB,YWHAE,YWHAG,YWHAQ,YWHAZ
	GO:BP	regulation of developmental process	GO:0050793	FALSE	0.000127259	3.89531	2474	81	28	21128	ACTB,AGO2,AKT1,APP,BAIAP2,CSNK1D,DDB1,EGFR,GSK3B,HAX1,HDAC6,HSP90AB1,HSPA9,LRRK2,MAPT,MYC,PIK3R1,PKM,PRKACA,SETD1A,SFN,SGF29,SIRT1,TP53,VPS35,YWHAG,YWHAH,YWHAZ
	GO:BP	nervous system development	GO:0007399	FALSE	0.000196877	3.70581	2525	81	28	21128	ACTB,AKT1,APP,ATN1,BAIAP2,CNP,CSNK1D,EGFR,GSK3B,HDAC6,HSP90AB1,LRRK2,MAPT,PLEC,PRKACA,RPL24,SETD1A,SH3GL1,SNCA,TP53,TUBB3,VIM,VPS35,YWHAE,YWHAG,YWHAH,YWHAQ,YWHAZ
	GO:BP	regulation of protein metabolic process	GO:0051246	FALSE	7.91215e-15	14.1017	2560	81	42	21128	ACTB,AGO2,AKT1,APP,BAG2,BANP,CAMK2D,CCAR2,CSNK1A1,CSNK1D,CSTA,DDB1,DNAJA1,EEF1A2,EGFR,GSK3B,HAX1,HDAC6,HSP90AB1,HTT,LRRK2,MAPT,MYC,PKM,PLEC,PPP1CA,PRKACA,PSMD2,RPL23,RPS14,SFN,SGF29,SIRT1,SNCA,SQSTM1,STUB1,TP53,VIM,VPS35,YWHAB,YWHAE,YWHAG
	GO:BP	catabolic process	GO:0009056	FALSE	1.49212e-09	8.8262	2609	81	36	21128	AGO2,AKT1,APP,BAG2,BANP,CCAR2,CNP,CSNK1A1,CSNK1D,CYLD,DDB1,ECHS1,EEF1A2,EGFR,GSK3B,HAX1,HDAC6,HSP90AB1,HSPA8,HTT,LRRK2,MAPT,OPTN,PKM,PPP1CA,PRKACA,PSMD2,RPL23,SIRT1,SNCA,SQSTM1,STUB1,TP53,VIM,VPS35,YWHAH
	GO:BP	response to organic substance	GO:0010033	FALSE	4.09575e-07	6.38767	2664	81	33	21128	ACTB,ACTG1,AKT1,APP,BAIAP2,CNP,CYLD,DNAJA1,EGFR,GSK3B,HAX1,HDAC6,HSP90AB1,HSPA4,HSPA8,HSPA9,LRRK2,OPTN,PIK3R1,PKM,PPP2R2A,PRKACA,PRMT2,RPL23,SIRT1,SNCA,STUB1,TP53,TUFM,VIM,VPS35,YWHAG,YWHAH
	GO:BP	intracellular signal transduction	GO:0035556	FALSE	0.00229982	2.63831	2667	81	27	21128	AKT1,APP,CAMK2D,CCAR2,CYLD,DNAJA1,EDA,EGFR,GSK3B,HAX1,HSP90AB1,HTT,LRRK2,MAPT,MYC,OPTN,PIK3R1,PRKACA,RPL23,SFN,SIRT1,SQSTM1,TP53,VIM,YWHAE,YWHAQ,YWHAZ
	GO:BP	organic substance transport	GO:0071702	FALSE	0.00253126	2.59666	2680	81	27	21128	ACTB,AKT1,DNAJA1,GSK3B,HAX1,HDAC6,HSP90AB1,HSPA4,HSPA8,HSPA9,LRRK2,OPTN,PIK3R1,PRKACA,RPL23,SFN,SIRT1,SNCA,SQSTM1,TP53,VPS35,YWHAB,YWHAE,YWHAG,YWHAH,YWHAQ,YWHAZ
	GO:BP	anatomical structure morphogenesis	GO:0009653	FALSE	0.00286656	2.54264	2697	81	27	21128	ACTB,ACTG1,AGO2,AKT1,APP,BAIAP2,CNP,CREBBP,EDA,EGFR,GSK3B,HDAC6,HSP90AB1,LRRK2,MAPT,MYC,PKM,PLEC,PPP1CA,PRKACA,RPL24,SIRT1,TP53,TUBB3,VPS35,YWHAH,YWHAZ
	GO:BP	cellular response to chemical stimulus	GO:0070887	FALSE	5.67585e-07	6.24597	2697	81	33	21128	ACTB,ACTG1,AKT1,APP,BAIAP2,CAMK2D,CYLD,DNAJA1,EGFR,GSK3B,HAX1,HDAC6,HSP90AB1,HSPA8,HSPA9,LRRK2,MAPT,MYC,OPTN,PIK3R1,PKM,PLEC,PRKACA,PRMT2,RPL23,SIRT1,SNCA,STUB1,TP53,VIM,VPS35,YWHAG,YWHAH
	GO:BP	protein localization	GO:0008104	FALSE	2.11251e-11	10.6752	2708	81	39	21128	ACTB,ACTG1,AKT1,BAIAP2,BANP,CCT3,CCT5,CCT6A,CCT8,CSNK1D,DCTN2,DNAJA1,EGFR,GSK3B,HAX1,HDAC6,HSP90AB1,HSPA4,HSPA8,HSPA9,LRRK2,MAPRE1,MAPT,OPTN,PIK3R1,PLEC,PRKACA,RPL23,SFN,SGF29,SQSTM1,TP53,VPS35,YWHAB,YWHAE,YWHAG,YWHAH,YWHAQ,YWHAZ
	GO:BP	cellular macromolecule localization	GO:0070727	FALSE	2.38827e-11	10.6219	2718	81	39	21128	ACTB,ACTG1,AKT1,BAIAP2,BANP,CCT3,CCT5,CCT6A,CCT8,CSNK1D,DCTN2,DNAJA1,EGFR,GSK3B,HAX1,HDAC6,HSP90AB1,HSPA4,HSPA8,HSPA9,LRRK2,MAPRE1,MAPT,OPTN,PIK3R1,PLEC,PRKACA,RPL23,SFN,SGF29,SQSTM1,TP53,VPS35,YWHAB,YWHAE,YWHAG,YWHAH,YWHAQ,YWHAZ
	GO:BP	cell development	GO:0048468	FALSE	0.000263719	3.57886	2728	81	29	21128	ACTB,ACTG1,AKT1,APP,BAIAP2,CNP,DDB1,GSK3B,HAX1,HDAC6,HSP90AB1,HSPA9,LRRK2,MAPT,MYC,PIK3R1,PLEC,PRKACA,PRMT2,RPL24,RPS14,SETD1A,SFN,SIRT1,TP53,TUBB3,VIM,YWHAH,YWHAZ
	GO:BP	regulation of biological quality	GO:0065008	FALSE	1.88273e-13	12.7252	2790	81	42	21128	ACTB,ACTG1,AGO2,AKT1,APP,BAG2,BAIAP2,CAMK2D,CCAR2,CCT3,CCT5,CCT6A,CCT8,CNP,CREBBP,DDB1,GSK3B,HAX1,HDAC6,HSP90AB1,HSPA8,HTT,LRRK2,MAPT,PIK3R1,PLEC,PPP1CA,PRKACA,RPL23,SIRT1,SNCA,SQSTM1,STUB1,TP53,TUBA1A,TUBB,VIM,VPS35,YWHAE,YWHAG,YWHAH,YWHAZ
	GO:BP	phosphate-containing compound metabolic process	GO:0006796	FALSE	2.26411e-06	5.6451	2843	81	33	21128	ACTB,AKT1,APP,CAMK2D,CNP,CSNK1A1,CSNK1D,DNAJA1,EEF1A2,EGFR,GSK3B,HAX1,HDAC6,HSP90AB1,HSPA8,HTT,LRRK2,MAPT,PIK3R1,PKM,PLEC,PPP1CA,PPP2R2A,PRKACA,SFN,SIRT1,SNCA,SQSTM1,TP53,YWHAB,YWHAE,YWHAG,YWHAZ
	GO:BP	phosphorus metabolic process	GO:0006793	FALSE	2.84267e-06	5.54627	2868	81	33	21128	ACTB,AKT1,APP,CAMK2D,CNP,CSNK1A1,CSNK1D,DNAJA1,EEF1A2,EGFR,GSK3B,HAX1,HDAC6,HSP90AB1,HSPA8,HTT,LRRK2,MAPT,PIK3R1,PKM,PLEC,PPP1CA,PPP2R2A,PRKACA,SFN,SIRT1,SNCA,SQSTM1,TP53,YWHAB,YWHAE,YWHAG,YWHAZ
	GO:BP	regulation of signal transduction	GO:0009966	FALSE	1.90978e-06	5.71902	2991	81	34	21128	AKT1,APP,BAIAP2,CCAR2,CREBBP,CSNK1A1,CSNK1D,CYLD,DNAJA1,EDA,EGFR,GSK3B,HAX1,HDAC6,HSP90AB1,HTT,LRRK2,MAPT,MYC,OPTN,PIK3R1,PPP1CA,PRKACA,PRMT2,RPL23,SIRT1,SNCA,SQSTM1,STUB1,TP53,VPS35,YWHAB,YWHAG,YWHAZ
	GO:BP	regulation of multicellular organismal process	GO:0051239	FALSE	0.00702932	2.15309	3004	81	28	21128	ACTB,AGO2,AKT1,APP,BAIAP2,CAMK2D,CYLD,DYNC1H1,EGFR,GSK3B,HAX1,HDAC6,HSP90AB1,HSPA9,LRRK2,MAPT,MYC,PIK3R1,PKM,PRKACA,SFN,SGF29,SIRT1,SNCA,TP53,VPS35,YWHAE,YWHAH
	GO:BP	regulation of molecular function	GO:0065009	FALSE	1.15728e-09	8.93656	3059	81	39	21128	ACTB,AKT1,APP,BAG2,CAMK2D,CCAR2,CSNK1A1,CSTA,CYLD,DNAJA1,EDA,EEF1A2,EGFR,GSK3B,HDAC6,HSP90AB1,HTT,LRRK2,MAPRE1,MAPT,MYC,PIK3R1,PLEC,PPP1CA,PPP2R2A,PPP2R2B,PRKACA,PRMT2,PSMD2,RPL23,SFN,SIRT1,SNCA,STUB1,TP53,YWHAB,YWHAE,YWHAG,YWHAH
	GO:BP	positive regulation of cellular metabolic process	GO:0031325	FALSE	3.04743e-10	9.51607	3097	81	40	21128	ACTB,AGO2,AKT1,APP,ATN1,BANP,CCAR2,CCT3,CCT5,CCT6A,CCT8,CREBBP,CSNK1A1,CSNK1D,DDB1,EEF1A2,EGFR,GSK3B,HAX1,HDAC6,HSP90AB1,HSPA8,HTT,LRRK2,MAPT,MYC,OPTN,PIK3R1,PKM,PRMT2,SGF29,SIRT1,SNCA,SQSTM1,STUB1,TP53,UBTF,VIM,VPS35,YWHAH
	GO:BP	animal organ development	GO:0048513	FALSE	0.0138029	1.86003	3109	81	28	21128	ACTB,AKT1,APP,ATN1,BAIAP2,CNP,CSNK1D,CSTA,EDA,EGFR,GSK3B,HSP90AB1,LRRK2,MYC,MYL6,PLEC,PPP1CA,RPL13,RPL24,SETD1A,SFN,SIRT1,TP53,VIM,YWHAE,YWHAH,YWHAQ,YWHAZ
	GO:BP	positive regulation of nitrogen compound metabolic process	GO:0051173	FALSE	1.63737e-08	7.78585	3154	81	38	21128	ACTB,AGO2,AKT1,APP,ATN1,BAG2,BANP,CCAR2,CCT3,CCT5,CCT6A,CCT8,CREBBP,CSNK1A1,CSNK1D,DDB1,EGFR,GSK3B,HAX1,HDAC6,HSP90AB1,HSPA8,LRRK2,MAPT,MYC,PIK3R1,PKM,PRMT2,SGF29,SIRT1,SNCA,SQSTM1,STUB1,TP53,UBTF,VIM,VPS35,YWHAH
	GO:BP	macromolecule localization	GO:0033036	FALSE	7.13124e-10	9.14683	3177	81	40	21128	ACTB,ACTG1,AKT1,BAIAP2,BANP,CCT3,CCT5,CCT6A,CCT8,CSNK1D,DCTN2,DNAJA1,EGFR,GSK3B,HAX1,HDAC6,HSP90AB1,HSPA4,HSPA8,HSPA9,LRRK2,MAPRE1,MAPT,OPTN,PIK3R1,PLEC,PRKACA,RPL23,SFN,SGF29,SIRT1,SQSTM1,TP53,VPS35,YWHAB,YWHAE,YWHAG,YWHAH,YWHAQ,YWHAZ
	GO:BP	cellular macromolecule metabolic process	GO:0044260	FALSE	1.72707e-09	8.76269	3263	81	40	21128	ACTB,AGO2,AKT1,APP,CCAR2,CCT3,CCT5,CCT6A,CCT8,CREBBP,CSNK1A1,CSNK1D,CYLD,DDB1,EEF1A2,EGFR,GSK3B,HDAC6,HSP90AB1,LRRK2,MYC,OPTN,PKM,PPP1CA,PRMT2,PSMD2,RPL13,RPL23,RPL24,RPS11,RPS14,SETD1A,SGF29,SIRT1,SNCA,SQSTM1,STUB1,TP53,TUFM,VIM
	GO:BP	negative regulation of macromolecule metabolic process	GO:0010605	FALSE	2.36311e-06	5.62652	3360	81	36	21128	AGO2,AKT1,APP,ATN1,BAG2,BANP,CCAR2,CREBBP,CSTA,CYLD,DNAJA1,EGFR,GSK3B,HDAC6,HSP90AB1,HSPA8,LRRK2,MAPT,MYC,OPTN,PLEC,PRMT2,RPL23,RPS14,SFN,SIRT1,SNCA,SQSTM1,TP53,VIM,VPS35,YWHAB,YWHAE,YWHAG,YWHAQ,YWHAZ
	GO:BP	regulation of signaling	GO:0023051	FALSE	1.15432e-05	4.93767	3378	81	35	21128	AKT1,APP,BAIAP2,CCAR2,CREBBP,CSNK1A1,CSNK1D,CYLD,DNAJA1,EDA,EGFR,GSK3B,HAX1,HDAC6,HSP90AB1,HTT,LRRK2,MAPT,MYC,OPTN,PIK3R1,PPP1CA,PRKACA,PRMT2,RPL23,SIRT1,SNCA,SQSTM1,STUB1,TP53,VPS35,YWHAB,YWHAG,YWHAH,YWHAZ
	GO:BP	regulation of cell communication	GO:0010646	FALSE	2.98053e-06	5.52571	3388	81	36	21128	AKT1,APP,BAIAP2,CAMK2D,CCAR2,CREBBP,CSNK1A1,CSNK1D,CYLD,DNAJA1,EDA,EGFR,GSK3B,HAX1,HDAC6,HSP90AB1,HTT,LRRK2,MAPT,MYC,OPTN,PIK3R1,PPP1CA,PRKACA,PRMT2,RPL23,SIRT1,SNCA,SQSTM1,STUB1,TP53,VPS35,YWHAB,YWHAG,YWHAH,YWHAZ
	GO:BP	regulation of DNA-templated transcription	GO:0006355	FALSE	0.0122945	1.91029	3465	81	30	21128	ACTB,AGO2,AKT1,APP,ATN1,BANP,CAMK2D,CCAR2,CREBBP,CYLD,EDA,EGFR,EWSR1,HAX1,HDAC6,HSPA8,MYC,PIK3R1,PRMT2,RPL23,RPS14,SGF29,SIRT1,SNCA,SQSTM1,TP53,UBTF,YWHAH,YWHAQ,YWHAZ
	GO:BP	regulation of nucleic acid-templated transcription	GO:1903506	FALSE	0.0124418	1.90512	3467	81	30	21128	ACTB,AGO2,AKT1,APP,ATN1,BANP,CAMK2D,CCAR2,CREBBP,CYLD,EDA,EGFR,EWSR1,HAX1,HDAC6,HSPA8,MYC,PIK3R1,PRMT2,RPL23,RPS14,SGF29,SIRT1,SNCA,SQSTM1,TP53,UBTF,YWHAH,YWHAQ,YWHAZ
	GO:BP	protein-containing complex organization	GO:0043933	FALSE	0.0380879	1.41921	3469	81	29	21128	AGO2,BAIAP2,CCT3,CCT8,CREBBP,CSNK1D,EGFR,GSK3B,HAX1,HDAC6,HSP90AB1,HSPA4,HSPA8,LRRK2,MAPRE1,MAPT,MYC,PLEC,PPP1CA,PRKACA,RPL23,RPL24,RPS14,SH3GL1,SNCA,STUB1,TP53,UBTF,VPS35
	GO:BP	regulation of RNA biosynthetic process	GO:2001141	FALSE	0.0142572	1.84596	3490	81	30	21128	ACTB,AGO2,AKT1,APP,ATN1,BANP,CAMK2D,CCAR2,CREBBP,CYLD,EDA,EGFR,EWSR1,HAX1,HDAC6,HSPA8,MYC,PIK3R1,PRMT2,RPL23,RPS14,SGF29,SIRT1,SNCA,SQSTM1,TP53,UBTF,YWHAH,YWHAQ,YWHAZ
	GO:BP	positive regulation of macromolecule metabolic process	GO:0010604	FALSE	4.86337e-09	8.31306	3540	81	41	21128	ACTB,ACTG1,AGO2,AKT1,APP,ATN1,BAG2,BANP,CCAR2,CCT3,CCT5,CCT6A,CCT8,CREBBP,CSNK1A1,CSNK1D,DDB1,EDA,EGFR,GSK3B,HAX1,HDAC6,HSP90AB1,HSPA8,LRRK2,MAPT,MYC,PIK3R1,PKM,PRMT2,RPL23,SGF29,SIRT1,SNCA,SQSTM1,STUB1,TP53,UBTF,VIM,VPS35,YWHAH
	GO:BP	organelle organization	GO:0006996	FALSE	2.16716e-10	9.66411	3568	81	43	21128	ACTB,ACTG1,AKT1,BAIAP2,CCAR2,CCT3,CCT5,CCT6A,CCT8,CNP,CSNK1A1,CSNK1D,CYLD,DCTN2,DYNC1H1,GSK3B,HAX1,HDAC6,HSP90AB1,HSPA4,HSPA9,HTT,LRRK2,MAPRE1,MAPT,MYC,OPTN,PIK3R1,PLEC,RPL24,RPS14,SFN,SIRT1,SNCA,SQSTM1,TP53,TUBA1A,TUBB,TUBB3,TUBB4B,VIM,VPS35,YWHAZ
	GO:BP	negative regulation of metabolic process	GO:0009892	FALSE	1.35814e-05	4.86706	3579	81	36	21128	AGO2,AKT1,APP,ATN1,BAG2,BANP,CCAR2,CREBBP,CSTA,CYLD,DNAJA1,EGFR,GSK3B,HDAC6,HSP90AB1,HSPA8,LRRK2,MAPT,MYC,OPTN,PLEC,PRMT2,RPL23,RPS14,SFN,SIRT1,SNCA,SQSTM1,TP53,VIM,VPS35,YWHAB,YWHAE,YWHAG,YWHAQ,YWHAZ
	GO:BP	DNA-templated transcription	GO:0006351	FALSE	0.0245261	1.61037	3584	81	30	21128	ACTB,AGO2,AKT1,APP,ATN1,BANP,CAMK2D,CCAR2,CREBBP,CYLD,EDA,EGFR,EWSR1,HAX1,HDAC6,HSPA8,MYC,PIK3R1,PRMT2,RPL23,RPS14,SGF29,SIRT1,SNCA,SQSTM1,TP53,UBTF,YWHAH,YWHAQ,YWHAZ
	GO:BP	nucleic acid-templated transcription	GO:0097659	FALSE	0.0246651	1.60792	3585	81	30	21128	ACTB,AGO2,AKT1,APP,ATN1,BANP,CAMK2D,CCAR2,CREBBP,CYLD,EDA,EGFR,EWSR1,HAX1,HDAC6,HSPA8,MYC,PIK3R1,PRMT2,RPL23,RPS14,SGF29,SIRT1,SNCA,SQSTM1,TP53,UBTF,YWHAH,YWHAQ,YWHAZ
	GO:BP	cellular localization	GO:0051641	TRUE	2.51912e-14	13.5988	3588	81	48	21128	ACTB,ACTG1,AKT1,APP,BAIAP2,BANP,CAMK2D,CCT3,CCT5,CCT6A,CCT8,CNP,CSNK1D,DCTN2,DNAJA1,DYNC1H1,EGFR,GSK3B,HAX1,HDAC6,HSP90AB1,HSPA4,HSPA8,HSPA9,HTT,LRRK2,MAPRE1,MAPT,OPTN,PIK3R1,PLEC,PRKACA,RPL23,SFN,SGF29,SH3GL1,SNCA,SQSTM1,TP53,TUBA1A,TUBB,VPS35,YWHAB,YWHAE,YWHAG,YWHAH,YWHAQ,YWHAZ
	GO:BP	RNA biosynthetic process	GO:0032774	FALSE	0.0303485	1.51786	3622	81	30	21128	ACTB,AGO2,AKT1,APP,ATN1,BANP,CAMK2D,CCAR2,CREBBP,CYLD,EDA,EGFR,EWSR1,HAX1,HDAC6,HSPA8,MYC,PIK3R1,PRMT2,RPL23,RPS14,SGF29,SIRT1,SNCA,SQSTM1,TP53,UBTF,YWHAH,YWHAQ,YWHAZ
	GO:BP	protein modification process	GO:0036211	FALSE	1.33532e-08	7.87441	3649	81	41	21128	ACTB,AKT1,APP,BAG2,CAMK2D,CCAR2,CREBBP,CSNK1A1,CSNK1D,CSTA,CYLD,DDB1,DNAJA1,EGFR,GSK3B,HAX1,HDAC6,HSP90AB1,HTT,LRRK2,MAPT,PIK3R1,PKM,PLEC,PPP1CA,PPP2R2A,PRKACA,PRMT2,RPL23,SETD1A,SFN,SGF29,SIRT1,SNCA,SQSTM1,STUB1,TP53,YWHAB,YWHAE,YWHAG,YWHAZ
	GO:BP	regulation of RNA metabolic process	GO:0051252	FALSE	0.0250635	1.60096	3783	81	31	21128	ACTB,AGO2,AKT1,APP,ATN1,BANP,CAMK2D,CCAR2,CREBBP,CYLD,EDA,EGFR,EWSR1,HAX1,HDAC6,HSPA8,MYC,PIK3R1,PRMT2,RPL23,RPS14,SGF29,SIRT1,SNCA,SQSTM1,TP53,UBTF,VIM,YWHAH,YWHAQ,YWHAZ
	GO:BP	positive regulation of metabolic process	GO:0009893	FALSE	1.16232e-10	9.93467	3857	81	45	21128	ACTB,ACTG1,AGO2,AKT1,APP,ATN1,BAG2,BANP,CCAR2,CCT3,CCT5,CCT6A,CCT8,CREBBP,CSNK1A1,CSNK1D,DDB1,DYNC1H1,EDA,EEF1A2,EGFR,GSK3B,HAX1,HDAC6,HSP90AB1,HSPA8,HTT,LRRK2,MAPT,MYC,OPTN,PIK3R1,PKM,PRMT2,RPL23,SGF29,SIRT1,SNCA,SQSTM1,STUB1,TP53,UBTF,VIM,VPS35,YWHAH
	GO:BP	macromolecule modification	GO:0043412	FALSE	1.97969e-08	7.7034	3873	81	42	21128	ACTB,AKT1,APP,BAG2,CAMK2D,CCAR2,CREBBP,CSNK1A1,CSNK1D,CSTA,CYLD,DDB1,DNAJA1,EGFR,GSK3B,HAX1,HDAC6,HSP90AB1,HTT,LRRK2,MAPT,MYC,PIK3R1,PKM,PLEC,PPP1CA,PPP2R2A,PRKACA,PRMT2,RPL23,SETD1A,SFN,SGF29,SIRT1,SNCA,SQSTM1,STUB1,TP53,YWHAB,YWHAE,YWHAG,YWHAZ
	GO:BP	system development	GO:0048731	FALSE	0.000207271	3.68346	3962	81	36	21128	ACTB,ACTG1,AGO2,AKT1,APP,ATN1,BAIAP2,CNP,CSNK1D,EDA,EGFR,GSK3B,HDAC6,HSP90AB1,LRRK2,MAPT,MYC,PKM,PLEC,PPP1CA,PRKACA,RPL13,RPL24,SETD1A,SH3GL1,SIRT1,SNCA,TP53,TUBB3,VIM,VPS35,YWHAE,YWHAG,YWHAH,YWHAQ,YWHAZ
	GO:BP	regulation of macromolecule biosynthetic process	GO:0010556	FALSE	8.95231e-07	6.04807	3965	81	40	21128	ACTB,AGO2,AKT1,APP,ATN1,BANP,CAMK2D,CCAR2,CCT3,CCT5,CCT6A,CCT8,CREBBP,CYLD,EDA,EGFR,EWSR1,GSK3B,HAX1,HDAC6,HSP90AB1,HSPA8,LRRK2,MYC,PIK3R1,PKM,PPP1CA,PRMT2,RPL23,RPS14,SGF29,SIRT1,SNCA,SQSTM1,TP53,UBTF,VIM,YWHAH,YWHAQ,YWHAZ
	GO:BP	response to stress	GO:0006950	FALSE	6.43025e-05	4.19177	3980	81	37	21128	ACTB,ACTG1,AKT1,APP,CCAR2,CREBBP,CYLD,DDB1,DNAJA1,EGFR,GSK3B,HDAC6,HSP90AB1,HSPA4,HSPA8,HSPA9,LRRK2,MAPT,MYC,OPTN,PIK3R1,PLEC,PPP1CA,PRKACA,SETD1A,SFN,SGF29,SIRT1,SNCA,SQSTM1,STUB1,TP53,TUBB,TUBB4B,VIM,VPS35,YWHAE
	GO:BP	regulation of response to stimulus	GO:0048583	FALSE	1.92026e-05	4.71664	3998	81	38	21128	ACTB,ACTG1,AKT1,APP,BAIAP2,CAMK2D,CCAR2,CREBBP,CSNK1A1,CSNK1D,CYLD,DNAJA1,EDA,EGFR,GSK3B,HAX1,HDAC6,HSP90AB1,HTT,LRRK2,MAPT,MYC,OPTN,PIK3R1,PPP1CA,PRKACA,PRMT2,RPL23,SGF29,SIRT1,SNCA,SQSTM1,STUB1,TP53,VPS35,YWHAB,YWHAG,YWHAZ
	GO:BP	nucleobase-containing compound biosynthetic process	GO:0034654	FALSE	0.00142285	2.84684	4072	81	35	21128	ACTB,AGO2,AKT1,APP,ATN1,BANP,CAMK2D,CCAR2,CCT3,CCT5,CCT6A,CCT8,CREBBP,CYLD,EDA,EGFR,EWSR1,HAX1,HDAC6,HSP90AB1,HSPA8,MYC,PIK3R1,PRMT2,RPL23,RPS14,SGF29,SIRT1,SNCA,SQSTM1,TP53,UBTF,YWHAH,YWHAQ,YWHAZ
	GO:BP	response to chemical	GO:0042221	FALSE	5.40052e-07	6.26756	4088	81	41	21128	ACTB,ACTG1,AKT1,APP,ATN1,BAIAP2,CAMK2D,CNP,CYLD,DNAJA1,EGFR,GSK3B,HAX1,HDAC6,HSP90AB1,HSPA4,HSPA8,HSPA9,LRRK2,MAPT,MYC,OPTN,PIK3R1,PKM,PLEC,PPP1CA,PPP2R2A,PRKACA,PRMT2,RPL23,RPL24,SIRT1,SNCA,STUB1,TP53,TUBB3,TUFM,VIM,VPS35,YWHAG,YWHAH
	GO:BP	regulation of nucleobase-containing compound metabolic process	GO:0019219	FALSE	0.000495505	3.30495	4097	81	36	21128	ACTB,AGO2,AKT1,APP,ATN1,BANP,CAMK2D,CCAR2,CCT3,CCT5,CCT6A,CCT8,CREBBP,CYLD,EDA,EGFR,EWSR1,HAX1,HDAC6,HSP90AB1,HSPA8,MYC,PIK3R1,PRMT2,RPL23,RPS14,SGF29,SIRT1,SNCA,SQSTM1,TP53,UBTF,VIM,YWHAH,YWHAQ,YWHAZ
	GO:BP	regulation of cellular biosynthetic process	GO:0031326	FALSE	7.14327e-07	6.1461	4124	81	41	21128	ACTB,AGO2,AKT1,APP,ATN1,BANP,CAMK2D,CCAR2,CCT3,CCT5,CCT6A,CCT8,CREBBP,CYLD,DDB1,EDA,EGFR,EWSR1,GSK3B,HAX1,HDAC6,HSP90AB1,HSPA8,MYC,PIK3R1,PKM,PPP1CA,PRMT2,RPL23,RPS14,SGF29,SIRT1,SNCA,SQSTM1,TP53,UBTF,VIM,VPS35,YWHAH,YWHAQ,YWHAZ
	GO:BP	heterocycle biosynthetic process	GO:0018130	FALSE	0.0022667	2.64461	4150	81	35	21128	ACTB,AGO2,AKT1,APP,ATN1,BANP,CAMK2D,CCAR2,CCT3,CCT5,CCT6A,CCT8,CREBBP,CYLD,EDA,EGFR,EWSR1,HAX1,HDAC6,HSP90AB1,HSPA8,MYC,PIK3R1,PRMT2,RPL23,RPS14,SGF29,SIRT1,SNCA,SQSTM1,TP53,UBTF,YWHAH,YWHAQ,YWHAZ
	GO:BP	aromatic compound biosynthetic process	GO:0019438	FALSE	0.000738035	3.13192	4161	81	36	21128	ACTB,AGO2,AKT1,APP,ATN1,BANP,CAMK2D,CCAR2,CCT3,CCT5,CCT6A,CCT8,CREBBP,CYLD,EDA,EGFR,EWSR1,HAX1,HDAC6,HSP90AB1,HSPA8,MYC,PIK3R1,PRMT2,RPL23,RPS14,SGF29,SIRT1,SNCA,SQSTM1,TP53,UBTF,VPS35,YWHAH,YWHAQ,YWHAZ
	GO:BP	regulation of biosynthetic process	GO:0009889	FALSE	2.72678e-07	6.56435	4190	81	42	21128	ACTB,AGO2,AKT1,APP,ATN1,BANP,CAMK2D,CCAR2,CCT3,CCT5,CCT6A,CCT8,CREBBP,CYLD,DDB1,EDA,EGFR,EWSR1,GSK3B,HAX1,HDAC6,HSP90AB1,HSPA8,LRRK2,MYC,PIK3R1,PKM,PPP1CA,PRMT2,RPL23,RPS14,SGF29,SIRT1,SNCA,SQSTM1,TP53,UBTF,VIM,VPS35,YWHAH,YWHAQ,YWHAZ
	GO:BP	cell differentiation	GO:0030154	FALSE	0.000475116	3.3232	4287	81	37	21128	ACTB,ACTG1,AKT1,APP,BAIAP2,CNP,CSNK1D,CSTA,DDB1,EDA,EGFR,GSK3B,HAX1,HDAC6,HSP90AB1,HSPA9,LRRK2,MAPT,MYC,PIK3R1,PLEC,PRKACA,PRMT2,RPL24,RPS14,SETD1A,SFN,SIRT1,SQSTM1,TP53,TUBB,TUBB3,VIM,YWHAE,YWHAG,YWHAH,YWHAZ
	GO:BP	organic cyclic compound biosynthetic process	GO:1901362	FALSE	0.00177071	2.75185	4307	81	36	21128	ACTB,AGO2,AKT1,APP,ATN1,BANP,CAMK2D,CCAR2,CCT3,CCT5,CCT6A,CCT8,CREBBP,CYLD,EDA,EGFR,EWSR1,HAX1,HDAC6,HSP90AB1,HSPA8,MYC,PIK3R1,PRMT2,RPL23,RPS14,SGF29,SIRT1,SNCA,SQSTM1,TP53,UBTF,VPS35,YWHAH,YWHAQ,YWHAZ
	GO:BP	cellular developmental process	GO:0048869	FALSE	0.000553945	3.25653	4312	81	37	21128	ACTB,ACTG1,AKT1,APP,BAIAP2,CNP,CSNK1D,CSTA,DDB1,EDA,EGFR,GSK3B,HAX1,HDAC6,HSP90AB1,HSPA9,LRRK2,MAPT,MYC,PIK3R1,PLEC,PRKACA,PRMT2,RPL24,RPS14,SETD1A,SFN,SIRT1,SQSTM1,TP53,TUBB,TUBB3,VIM,YWHAE,YWHAG,YWHAH,YWHAZ
	GO:BP	multicellular organism development	GO:0007275	FALSE	6.71366e-06	5.17304	4627	81	42	21128	ACTB,ACTG1,AGO2,AKT1,APP,ATN1,BAIAP2,CNP,CREBBP,CSNK1D,EDA,EGFR,GSK3B,HAX1,HDAC6,HSP90AB1,HSPA9,LRRK2,MAPT,MYC,PIK3R1,PKM,PLEC,PPP1CA,PRKACA,RPL13,RPL24,SETD1A,SFN,SGF29,SH3GL1,SIRT1,SNCA,TP53,TUBB3,VIM,VPS35,YWHAE,YWHAG,YWHAH,YWHAQ,YWHAZ
	GO:BP	cellular component assembly	GO:0022607	FALSE	0.033827	1.47074	4653	81	35	21128	ACTB,ACTG1,AGO2,APP,BAIAP2,CCT3,CCT8,CREBBP,CSNK1D,CYLD,DYNC1H1,EGFR,GSK3B,HAX1,HDAC6,HSP90AB1,HSPA4,HSPA8,HSPA9,HTT,LRRK2,MAPRE1,MAPT,PIK3R1,PLEC,PRKACA,RPL24,RPS14,SNCA,STUB1,TP53,TUBB,UBTF,VPS35,YWHAZ
	GO:BP	negative regulation of cellular process	GO:0048523	FALSE	2.33923e-07	6.63093	4755	81	45	21128	ACTB,AGO2,AKT1,APP,ATN1,CAMK2D,CCAR2,CREBBP,CSNK1A1,CYLD,DDB1,DNAJA1,EGFR,GSK3B,HAX1,HDAC6,HSP90AB1,HSPA8,HSPA9,HTT,LRRK2,MAPRE1,MAPT,MYC,OPTN,PIK3R1,PLEC,PRKACA,PRMT2,RPL23,RPS14,SFN,SIRT1,SNCA,SQSTM1,STUB1,TP53,VIM,VPS35,YWHAB,YWHAE,YWHAG,YWHAH,YWHAQ,YWHAZ
	GO:BP	transport	GO:0006810	FALSE	1.13734e-06	5.94411	4773	81	44	21128	ACTB,ACTG1,AKT1,APP,CAMK2D,CCT3,CCT5,CCT8,CNP,CSNK1D,DCTN2,DNAJA1,DYNC1H1,EGFR,GSK3B,HAX1,HDAC6,HSP90AB1,HSPA4,HSPA8,HSPA9,HTT,LRRK2,MAPT,MYC,OPTN,PIK3R1,PRKACA,RPL23,SFN,SH3GL1,SIRT1,SNCA,SQSTM1,TP53,TUBA1A,TUBB,VPS35,YWHAB,YWHAE,YWHAG,YWHAH,YWHAQ,YWHAZ
	GO:BP	macromolecule biosynthetic process	GO:0009059	FALSE	3.81824e-07	6.41814	4822	81	45	21128	ACTB,AGO2,AKT1,APP,ATN1,BANP,CAMK2D,CCAR2,CCT3,CCT5,CCT6A,CCT8,CREBBP,CYLD,EDA,EEF1A2,EGFR,EWSR1,GSK3B,HAX1,HDAC6,HSP90AB1,HSPA8,LRRK2,MYC,PIK3R1,PKM,PPP1CA,PRMT2,RPL13,RPL23,RPL24,RPS11,RPS14,SGF29,SIRT1,SNCA,SQSTM1,TP53,TUFM,UBTF,VIM,YWHAH,YWHAQ,YWHAZ
	GO:BP	cellular nitrogen compound biosynthetic process	GO:0044271	FALSE	2.56718e-06	5.59054	4890	81	44	21128	ACTB,AGO2,AKT1,APP,ATN1,BANP,CAMK2D,CCAR2,CCT3,CCT5,CCT6A,CCT8,CREBBP,CYLD,EDA,EEF1A2,EGFR,EWSR1,HAX1,HDAC6,HSP90AB1,HSPA8,MYC,PIK3R1,PKM,PPP1CA,PRMT2,RPL13,RPL23,RPL24,RPS11,RPS14,SGF29,SIRT1,SNCA,SQSTM1,TP53,TUFM,UBTF,VIM,VPS35,YWHAH,YWHAQ,YWHAZ
	GO:BP	establishment of localization	GO:0051234	FALSE	4.36588e-08	7.35993	4933	81	47	21128	ACTB,ACTG1,AKT1,APP,CAMK2D,CCT3,CCT5,CCT6A,CCT8,CNP,CSNK1D,DCTN2,DNAJA1,DYNC1H1,EGFR,GSK3B,HAX1,HDAC6,HSP90AB1,HSPA4,HSPA8,HSPA9,HTT,LRRK2,MAPRE1,MAPT,MYC,OPTN,PIK3R1,PRKACA,RPL23,SFN,SGF29,SH3GL1,SIRT1,SNCA,SQSTM1,TP53,TUBA1A,TUBB,VPS35,YWHAB,YWHAE,YWHAG,YWHAH,YWHAQ,YWHAZ
	GO:BP	protein metabolic process	GO:0019538	FALSE	3.49303e-11	10.4568	5482	81	54	21128	ACTB,AGO2,AKT1,APP,BAG2,BANP,CAMK2D,CCAR2,CREBBP,CSNK1A1,CSNK1D,CSTA,CYLD,DDB1,DNAJA1,EEF1A2,EGFR,GSK3B,HAX1,HDAC6,HSP90AB1,HSPA8,HTT,LRRK2,MAPT,MYC,PIK3R1,PKM,PLEC,PPP1CA,PPP2R2A,PRKACA,PRMT2,PSMD2,RPL13,RPL23,RPL24,RPS11,RPS14,SETD1A,SFN,SGF29,SIRT1,SNCA,SQSTM1,STUB1,TP53,TUFM,VIM,VPS35,YWHAB,YWHAE,YWHAG,YWHAZ
	GO:BP	regulation of gene expression	GO:0010468	FALSE	0.00124325	2.90544	5494	81	42	21128	ACTB,ACTG1,AGO2,AKT1,APP,ATN1,BAG2,BANP,CAMK2D,CCAR2,CREBBP,CSNK1D,CYLD,EDA,EGFR,EWSR1,GSK3B,HAX1,HDAC6,HSP90AB1,HSPA8,LRRK2,MAPT,MYC,PIK3R1,PKM,PPP1CA,PRKACA,PRMT2,RPL23,RPS14,SGF29,SIRT1,SNCA,SQSTM1,TP53,UBTF,VIM,VPS35,YWHAH,YWHAQ,YWHAZ
	GO:BP	localization	GO:0051179	FALSE	5.01517e-08	7.29971	5578	81	50	21128	ACTB,ACTG1,AKT1,APP,BAIAP2,BANP,CAMK2D,CCT3,CCT5,CCT6A,CCT8,CNP,CSNK1D,DCTN2,DNAJA1,DYNC1H1,EGFR,GSK3B,HAX1,HDAC6,HSP90AB1,HSPA4,HSPA8,HSPA9,HTT,LRRK2,MAPRE1,MAPT,MYC,OPTN,PIK3R1,PLEC,PRKACA,RPL23,SFN,SGF29,SH3GL1,SIRT1,SNCA,SQSTM1,TP53,TUBA1A,TUBB,VPS35,YWHAB,YWHAE,YWHAG,YWHAH,YWHAQ,YWHAZ
	GO:BP	regulation of cellular metabolic process	GO:0031323	FALSE	4.05663e-12	11.3918	5653	81	56	21128	ACTB,AGO2,AKT1,APP,ATN1,BANP,CAMK2D,CCAR2,CCT3,CCT5,CCT6A,CCT8,CREBBP,CSNK1A1,CSNK1D,CYLD,DDB1,DNAJA1,EDA,EEF1A2,EGFR,EWSR1,GSK3B,HAX1,HDAC6,HSP90AB1,HSPA8,HTT,LRRK2,MAPT,MYC,OPTN,PIK3R1,PKM,PLEC,PPP1CA,PRKACA,PRMT2,RPL23,RPS14,SFN,SGF29,SIRT1,SNCA,SQSTM1,STUB1,TP53,UBTF,VIM,VPS35,YWHAB,YWHAE,YWHAG,YWHAH,YWHAQ,YWHAZ
	GO:BP	positive regulation of cellular process	GO:0048522	FALSE	7.69537e-10	9.11377	5657	81	53	21128	ACTB,ACTG1,AGO2,AKT1,APP,ATN1,BAIAP2,BANP,CAMK2D,CCAR2,CCT3,CCT5,CCT6A,CCT8,CREBBP,CSNK1A1,CSNK1D,CYLD,DDB1,DNAJA1,DYNC1H1,EDA,EEF1A2,EGFR,GSK3B,HAX1,HDAC6,HSP90AB1,HSPA8,HTT,LRRK2,MAPRE1,MAPT,MYC,OPTN,PIK3R1,PKM,PPP1CA,PRKACA,PRMT2,RPL23,SFN,SGF29,SIRT1,SNCA,SQSTM1,STUB1,TP53,UBTF,VIM,VPS35,YWHAE,YWHAH
	GO:BP	regulation of nitrogen compound metabolic process	GO:0051171	FALSE	1.76704e-13	12.7528	5724	81	58	21128	ACTB,AGO2,AKT1,APP,ATN1,BAG2,BANP,CAMK2D,CCAR2,CCT3,CCT5,CCT6A,CCT8,CREBBP,CSNK1A1,CSNK1D,CSTA,CYLD,DDB1,DNAJA1,EDA,EEF1A2,EGFR,EWSR1,GSK3B,HAX1,HDAC6,HSP90AB1,HSPA8,HTT,LRRK2,MAPT,MYC,PIK3R1,PKM,PLEC,PPP1CA,PRKACA,PRMT2,PSMD2,RPL23,RPS14,SFN,SGF29,SIRT1,SNCA,SQSTM1,STUB1,TP53,UBTF,VIM,VPS35,YWHAB,YWHAE,YWHAG,YWHAH,YWHAQ,YWHAZ
	GO:BP	cellular biosynthetic process	GO:0044249	FALSE	5.21962e-05	4.28236	5793	81	46	21128	ACTB,AGO2,AKT1,APP,ATN1,BANP,CAMK2D,CCAR2,CCT3,CCT5,CCT6A,CCT8,CREBBP,CYLD,DDB1,EDA,EEF1A2,EGFR,EWSR1,GSK3B,HAX1,HDAC6,HSP90AB1,HSPA8,MYC,PIK3R1,PKM,PPP1CA,PRMT2,RPL13,RPL23,RPL24,RPS11,RPS14,SGF29,SIRT1,SNCA,SQSTM1,TP53,TUFM,UBTF,VIM,VPS35,YWHAH,YWHAQ,YWHAZ
	GO:BP	anatomical structure development	GO:0048856	FALSE	5.7115e-06	5.24325	5861	81	48	21128	ACTB,ACTG1,AGO2,AKT1,APP,ATN1,BAIAP2,CNP,CREBBP,CSNK1D,CSTA,DDB1,EDA,EGFR,GSK3B,HAX1,HDAC6,HSP90AB1,HSPA9,LRRK2,MAPT,MYC,MYL6,PIK3R1,PKM,PLEC,PPP1CA,PRKACA,PRMT2,RPL13,RPL24,RPS14,SETD1A,SFN,SGF29,SH3GL1,SIRT1,SNCA,TP53,TUBB,TUBB3,VIM,VPS35,YWHAE,YWHAG,YWHAH,YWHAQ,YWHAZ
	GO:BP	regulation of primary metabolic process	GO:0080090	FALSE	6.8581e-13	12.1638	5882	81	58	21128	ACTB,AGO2,AKT1,APP,ATN1,BAG2,BANP,CAMK2D,CCAR2,CCT3,CCT5,CCT6A,CCT8,CREBBP,CSNK1A1,CSNK1D,CSTA,CYLD,DDB1,DNAJA1,EDA,EEF1A2,EGFR,EWSR1,GSK3B,HAX1,HDAC6,HSP90AB1,HSPA8,HTT,LRRK2,MAPT,MYC,PIK3R1,PKM,PLEC,PPP1CA,PRKACA,PRMT2,PSMD2,RPL23,RPS14,SFN,SGF29,SIRT1,SNCA,SQSTM1,STUB1,TP53,UBTF,VIM,VPS35,YWHAB,YWHAE,YWHAG,YWHAH,YWHAQ,YWHAZ
	GO:BP	organic substance biosynthetic process	GO:1901576	FALSE	2.49073e-05	4.60367	5886	81	47	21128	ACTB,AGO2,AKT1,APP,ATN1,BANP,CAMK2D,CCAR2,CCT3,CCT5,CCT6A,CCT8,CREBBP,CYLD,DDB1,EDA,EEF1A2,EGFR,EWSR1,GSK3B,HAX1,HDAC6,HSP90AB1,HSPA8,LRRK2,MYC,PIK3R1,PKM,PPP1CA,PRMT2,RPL13,RPL23,RPL24,RPS11,RPS14,SGF29,SIRT1,SNCA,SQSTM1,TP53,TUFM,UBTF,VIM,VPS35,YWHAH,YWHAQ,YWHAZ
	GO:BP	negative regulation of biological process	GO:0048519	FALSE	8.53561e-06	5.06877	5927	81	48	21128	ACTB,AGO2,AKT1,APP,ATN1,BAG2,BANP,CAMK2D,CCAR2,CREBBP,CSNK1A1,CSTA,CYLD,DDB1,DNAJA1,EGFR,GSK3B,HAX1,HDAC6,HSP90AB1,HSPA8,HSPA9,HTT,LRRK2,MAPRE1,MAPT,MYC,OPTN,PIK3R1,PLEC,PRKACA,PRMT2,RPL23,RPS14,SFN,SIRT1,SNCA,SQSTM1,STUB1,TP53,VIM,VPS35,YWHAB,YWHAE,YWHAG,YWHAH,YWHAQ,YWHAZ
	GO:BP	biosynthetic process	GO:0009058	FALSE	4.12661e-05	4.38441	5973	81	47	21128	ACTB,AGO2,AKT1,APP,ATN1,BANP,CAMK2D,CCAR2,CCT3,CCT5,CCT6A,CCT8,CREBBP,CYLD,DDB1,EDA,EEF1A2,EGFR,EWSR1,GSK3B,HAX1,HDAC6,HSP90AB1,HSPA8,LRRK2,MYC,PIK3R1,PKM,PPP1CA,PRMT2,RPL13,RPL23,RPL24,RPS11,RPS14,SGF29,SIRT1,SNCA,SQSTM1,TP53,TUFM,UBTF,VIM,VPS35,YWHAH,YWHAQ,YWHAZ
	GO:BP	signal transduction	GO:0007165	FALSE	0.00553119	2.25718	6012	81	43	21128	AKT1,APP,BAIAP2,CAMK2D,CCAR2,CREBBP,CSNK1A1,CSNK1D,CYLD,DDB1,DNAJA1,EDA,EGFR,GSK3B,HAX1,HDAC6,HSP90AB1,HTT,LRRK2,MAPT,MYC,OPTN,PIK3R1,PPP1CA,PRKACA,PRMT2,RPL23,SFN,SH3GL1,SIRT1,SNCA,SQSTM1,STUB1,TP53,TUBB3,VIM,VPS35,YWHAB,YWHAE,YWHAG,YWHAH,YWHAQ,YWHAZ
	GO:BP	positive regulation of biological process	GO:0048518	FALSE	2.24078e-08	7.6496	6348	81	54	21128	ACTB,ACTG1,AGO2,AKT1,APP,ATN1,BAG2,BAIAP2,BANP,CAMK2D,CCAR2,CCT3,CCT5,CCT6A,CCT8,CREBBP,CSNK1A1,CSNK1D,CYLD,DDB1,DNAJA1,DYNC1H1,EDA,EEF1A2,EGFR,GSK3B,HAX1,HDAC6,HSP90AB1,HSPA8,HTT,LRRK2,MAPRE1,MAPT,MYC,OPTN,PIK3R1,PKM,PPP1CA,PRKACA,PRMT2,RPL23,SFN,SGF29,SIRT1,SNCA,SQSTM1,STUB1,TP53,UBTF,VIM,VPS35,YWHAE,YWHAH
	GO:BP	developmental process	GO:0032502	FALSE	1.27811e-05	4.89343	6446	81	50	21128	ACTB,ACTG1,AGO2,AKT1,APP,ATN1,BAIAP2,CNP,CREBBP,CSNK1D,CSTA,DDB1,DNAJA1,EDA,EGFR,GSK3B,HAX1,HDAC6,HSP90AB1,HSPA9,LRRK2,MAPT,MYC,MYL6,PIK3R1,PKM,PLEC,PPP1CA,PRKACA,PRMT2,RPL13,RPL24,RPS14,SETD1A,SFN,SGF29,SH3GL1,SIRT1,SNCA,SQSTM1,TP53,TUBB,TUBB3,VIM,VPS35,YWHAE,YWHAG,YWHAH,YWHAQ,YWHAZ
	GO:BP	signaling	GO:0023052	FALSE	0.0153554	1.81374	6462	81	44	21128	AKT1,APP,BAIAP2,CAMK2D,CCAR2,CNP,CREBBP,CSNK1A1,CSNK1D,CYLD,DDB1,DNAJA1,EDA,EGFR,GSK3B,HAX1,HDAC6,HSP90AB1,HTT,LRRK2,MAPT,MYC,OPTN,PIK3R1,PPP1CA,PRKACA,PRMT2,RPL23,SFN,SH3GL1,SIRT1,SNCA,SQSTM1,STUB1,TP53,TUBB3,VIM,VPS35,YWHAB,YWHAE,YWHAG,YWHAH,YWHAQ,YWHAZ
	GO:BP	organonitrogen compound metabolic process	GO:1901564	FALSE	1.70259e-08	7.76889	6538	81	55	21128	ACTB,AGO2,AKT1,APP,BAG2,BANP,CAMK2D,CCAR2,CREBBP,CSNK1A1,CSNK1D,CSTA,CYLD,DDB1,DNAJA1,ECHS1,EEF1A2,EGFR,GSK3B,HAX1,HDAC6,HSP90AB1,HSPA8,HTT,LRRK2,MAPT,MYC,PIK3R1,PKM,PLEC,PPP1CA,PPP2R2A,PRKACA,PRMT2,PSMD2,RPL13,RPL23,RPL24,RPS11,RPS14,SETD1A,SFN,SGF29,SIRT1,SNCA,SQSTM1,STUB1,TP53,TUFM,VIM,VPS35,YWHAB,YWHAE,YWHAG,YWHAZ
	GO:BP	cell communication	GO:0007154	FALSE	0.00308061	2.51136	6573	81	46	21128	AKT1,APP,BAIAP2,CAMK2D,CCAR2,CNP,CREBBP,CSNK1A1,CSNK1D,CYLD,DDB1,DNAJA1,EDA,EGFR,GSK3B,HAX1,HDAC6,HSP90AB1,HSPA8,HTT,LRRK2,MAPT,MYC,OPTN,PIK3R1,PLEC,PPP1CA,PRKACA,PRMT2,RPL23,SFN,SH3GL1,SIRT1,SNCA,SQSTM1,STUB1,TP53,TUBB3,VIM,VPS35,YWHAB,YWHAE,YWHAG,YWHAH,YWHAQ,YWHAZ
	GO:BP	regulation of macromolecule metabolic process	GO:0060255	FALSE	3.60634e-11	10.4429	6851	81	60	21128	ACTB,ACTG1,AGO2,AKT1,APP,ATN1,BAG2,BANP,CAMK2D,CCAR2,CCT3,CCT5,CCT6A,CCT8,CREBBP,CSNK1A1,CSNK1D,CSTA,CYLD,DDB1,DNAJA1,EDA,EEF1A2,EGFR,EWSR1,GSK3B,HAX1,HDAC6,HSP90AB1,HSPA8,HTT,LRRK2,MAPT,MYC,OPTN,PIK3R1,PKM,PLEC,PPP1CA,PRKACA,PRMT2,PSMD2,RPL23,RPS14,SFN,SGF29,SIRT1,SNCA,SQSTM1,STUB1,TP53,UBTF,VIM,VPS35,YWHAB,YWHAE,YWHAG,YWHAH,YWHAQ,YWHAZ
	GO:BP	regulation of metabolic process	GO:0019222	FALSE	2.78256e-10	9.55556	7386	81	61	21128	ACTB,ACTG1,AGO2,AKT1,APP,ATN1,BAG2,BANP,CAMK2D,CCAR2,CCT3,CCT5,CCT6A,CCT8,CREBBP,CSNK1A1,CSNK1D,CSTA,CYLD,DDB1,DNAJA1,DYNC1H1,EDA,EEF1A2,EGFR,EWSR1,GSK3B,HAX1,HDAC6,HSP90AB1,HSPA8,HTT,LRRK2,MAPT,MYC,OPTN,PIK3R1,PKM,PLEC,PPP1CA,PRKACA,PRMT2,PSMD2,RPL23,RPS14,SFN,SGF29,SIRT1,SNCA,SQSTM1,STUB1,TP53,UBTF,VIM,VPS35,YWHAB,YWHAE,YWHAG,YWHAH,YWHAQ,YWHAZ
	GO:BP	cellular response to stimulus	GO:0051716	FALSE	0.000863279	3.06385	7491	81	51	21128	ACTB,ACTG1,AKT1,APP,BAIAP2,CAMK2D,CCAR2,CREBBP,CSNK1A1,CSNK1D,CYLD,DDB1,DNAJA1,EDA,EGFR,GSK3B,HAX1,HDAC6,HSP90AB1,HSPA8,HSPA9,HTT,LRRK2,MAPT,MYC,OPTN,PIK3R1,PKM,PLEC,PPP1CA,PRKACA,PRMT2,RPL23,SETD1A,SFN,SGF29,SH3GL1,SIRT1,SNCA,SQSTM1,STUB1,TP53,TUBB3,VIM,VPS35,YWHAB,YWHAE,YWHAG,YWHAH,YWHAQ,YWHAZ
	GO:BP	multicellular organismal process	GO:0032501	FALSE	0.00554989	2.25572	7657	81	50	21128	ACTB,ACTG1,AGO2,AKT1,APP,ATN1,BAIAP2,CAMK2D,CNP,CREBBP,CSNK1D,CYLD,DNAJA1,DYNC1H1,EDA,EGFR,GSK3B,HAX1,HDAC6,HSP90AB1,HSPA9,HTT,LRRK2,MAPT,MYC,MYL6,PIK3R1,PKM,PLEC,PPP1CA,PRKACA,RPL13,RPL24,RPS14,SETD1A,SFN,SGF29,SH3GL1,SIRT1,SNCA,SQSTM1,TP53,TUBB3,VIM,VPS35,YWHAE,YWHAG,YWHAH,YWHAQ,YWHAZ
	GO:BP	cellular component organization	GO:0016043	FALSE	4.68991e-07	6.32884	8056	81	59	21128	ACTB,ACTG1,AGO2,AKT1,APP,BAIAP2,BANP,CAMK2D,CCAR2,CCT3,CCT5,CCT6A,CCT8,CNP,CREBBP,CSNK1A1,CSNK1D,CYLD,DCTN2,DYNC1H1,EGFR,GSK3B,HAX1,HDAC6,HSP90AB1,HSPA4,HSPA8,HSPA9,HTT,LRRK2,MAPRE1,MAPT,MYC,OPTN,PIK3R1,PLEC,PPP1CA,PRKACA,RPL23,RPL24,RPS14,SETD1A,SFN,SGF29,SH3GL1,SIRT1,SNCA,SQSTM1,STUB1,TP53,TUBA1A,TUBB,TUBB3,TUBB4B,UBTF,VIM,VPS35,YWHAH,YWHAZ
	GO:BP	cellular component organization or biogenesis	GO:0071840	FALSE	1.49168e-06	5.82632	8262	81	59	21128	ACTB,ACTG1,AGO2,AKT1,APP,BAIAP2,BANP,CAMK2D,CCAR2,CCT3,CCT5,CCT6A,CCT8,CNP,CREBBP,CSNK1A1,CSNK1D,CYLD,DCTN2,DYNC1H1,EGFR,GSK3B,HAX1,HDAC6,HSP90AB1,HSPA4,HSPA8,HSPA9,HTT,LRRK2,MAPRE1,MAPT,MYC,OPTN,PIK3R1,PLEC,PPP1CA,PRKACA,RPL23,RPL24,RPS14,SETD1A,SFN,SGF29,SH3GL1,SIRT1,SNCA,SQSTM1,STUB1,TP53,TUBA1A,TUBB,TUBB3,TUBB4B,UBTF,VIM,VPS35,YWHAH,YWHAZ
	GO:BP	response to stimulus	GO:0050896	FALSE	2.17123e-05	4.66329	9039	81	60	21128	ACTB,ACTG1,AKT1,APP,ATN1,BAIAP2,CAMK2D,CCAR2,CCT5,CNP,CREBBP,CSNK1A1,CSNK1D,CYLD,DDB1,DNAJA1,EDA,EGFR,GSK3B,HAX1,HDAC6,HSP90AB1,HSPA4,HSPA8,HSPA9,HTT,LRRK2,MAPT,MYC,OPTN,PIK3R1,PKM,PLEC,PPP1CA,PPP2R2A,PRKACA,PRMT2,RPL23,RPL24,SETD1A,SFN,SGF29,SH3GL1,SIRT1,SNCA,SQSTM1,STUB1,TP53,TUBB,TUBB3,TUBB4B,TUFM,VIM,VPS35,YWHAB,YWHAE,YWHAG,YWHAH,YWHAQ,YWHAZ
	GO:BP	regulation of cellular process	GO:0050794	FALSE	0.00012578	3.90039	11139	81	66	21128	ACTB,ACTG1,AGO2,AKT1,APP,ATN1,BAIAP2,BANP,CAMK2D,CCAR2,CCT3,CCT5,CCT6A,CCT8,CREBBP,CSNK1A1,CSNK1D,CYLD,DDB1,DNAJA1,DYNC1H1,EDA,EEF1A2,EGFR,EWSR1,GSK3B,HAX1,HDAC6,HSP90AB1,HSPA8,HSPA9,HTT,LRRK2,MAPRE1,MAPT,MYC,OPTN,PIK3R1,PKM,PLEC,PPP1CA,PRKACA,PRMT2,RPL23,RPS14,SETD1A,SFN,SGF29,SH3GL1,SIRT1,SNCA,SQSTM1,STUB1,TP53,TUBA1A,TUBB,TUBB3,UBTF,VIM,VPS35,YWHAB,YWHAE,YWHAG,YWHAH,YWHAQ,YWHAZ
	GO:BP	cellular metabolic process	GO:0044237	FALSE	0.00765216	2.11622	12122	81	66	21128	ACTB,AGO2,AKT1,APP,ATN1,BANP,CAMK2D,CCAR2,CCT3,CCT5,CCT6A,CCT8,CNP,CREBBP,CSNK1A1,CSNK1D,CYLD,DDB1,DNAJA1,ECHS1,EDA,EEF1A2,EGFR,EWSR1,GSK3B,HAX1,HDAC6,HSP90AB1,HSPA8,HSPA9,HTT,LRRK2,MAPT,MYC,OPTN,PIK3R1,PKM,PLEC,PPP1CA,PPP2R2A,PRKACA,PRMT2,PSMD2,RPL13,RPL23,RPL24,RPS11,RPS14,SETD1A,SFN,SGF29,SIRT1,SNCA,SQSTM1,STUB1,TP53,TUFM,UBTF,VIM,VPS35,YWHAB,YWHAE,YWHAG,YWHAH,YWHAQ,YWHAZ
	GO:BP	nitrogen compound metabolic process	GO:0006807	FALSE	0.0118016	1.92806	12235	81	66	21128	ACTB,AGO2,AKT1,APP,ATN1,BAG2,BANP,CAMK2D,CCAR2,CCT3,CCT5,CCT6A,CCT8,CNP,CREBBP,CSNK1A1,CSNK1D,CSTA,CYLD,DDB1,DNAJA1,ECHS1,EDA,EEF1A2,EGFR,EWSR1,GSK3B,HAX1,HDAC6,HSP90AB1,HSPA8,HTT,LRRK2,MAPT,MYC,PIK3R1,PKM,PLEC,PPP1CA,PPP2R2A,PRKACA,PRMT2,PSMD2,RPL13,RPL23,RPL24,RPS11,RPS14,SETD1A,SFN,SGF29,SIRT1,SNCA,SQSTM1,STUB1,TP53,TUFM,UBTF,VIM,VPS35,YWHAB,YWHAE,YWHAG,YWHAH,YWHAQ,YWHAZ
	GO:BP	macromolecule metabolic process	GO:0043170	FALSE	0.0177921	1.74977	12344	81	66	21128	ACTB,ACTG1,AGO2,AKT1,APP,ATN1,BAG2,BANP,CAMK2D,CCAR2,CCT3,CCT5,CCT6A,CCT8,CREBBP,CSNK1A1,CSNK1D,CSTA,CYLD,DDB1,DNAJA1,EDA,EEF1A2,EGFR,EWSR1,GSK3B,HAX1,HDAC6,HSP90AB1,HSPA8,HTT,LRRK2,MAPT,MYC,OPTN,PIK3R1,PKM,PLEC,PPP1CA,PPP2R2A,PRKACA,PRMT2,PSMD2,RPL13,RPL23,RPL24,RPS11,RPS14,SETD1A,SFN,SGF29,SIRT1,SNCA,SQSTM1,STUB1,TP53,TUFM,UBTF,VIM,VPS35,YWHAB,YWHAE,YWHAG,YWHAH,YWHAQ,YWHAZ
	GO:BP	regulation of biological process	GO:0050789	FALSE	0.000445496	3.35116	12378	81	69	21128	ACTB,ACTG1,AGO2,AKT1,APP,ATN1,BAG2,BAIAP2,BANP,CAMK2D,CCAR2,CCT3,CCT5,CCT6A,CCT8,CREBBP,CSNK1A1,CSNK1D,CSTA,CYLD,DDB1,DNAJA1,DYNC1H1,EDA,EEF1A2,EGFR,EWSR1,GSK3B,HAX1,HDAC6,HSP90AB1,HSPA8,HSPA9,HTT,LRRK2,MAPRE1,MAPT,MYC,OPTN,PIK3R1,PKM,PLEC,PPP1CA,PRKACA,PRMT2,PSMD2,RPL23,RPS14,SETD1A,SFN,SGF29,SH3GL1,SIRT1,SNCA,SQSTM1,STUB1,TP53,TUBA1A,TUBB,TUBB3,UBTF,VIM,VPS35,YWHAB,YWHAE,YWHAG,YWHAH,YWHAQ,YWHAZ
	GO:BP	biological regulation	GO:0065007	FALSE	5.51581e-05	4.25839	12926	81	72	21128	ACTB,ACTG1,AGO2,AKT1,APP,ATN1,BAG2,BAIAP2,BANP,CAMK2D,CCAR2,CCT3,CCT5,CCT6A,CCT8,CNP,CREBBP,CSNK1A1,CSNK1D,CSTA,CYLD,DDB1,DNAJA1,DYNC1H1,EDA,EEF1A2,EGFR,EWSR1,GSK3B,HAX1,HDAC6,HSP90AB1,HSPA8,HSPA9,HTT,LRRK2,MAPRE1,MAPT,MYC,OPTN,PIK3R1,PKM,PLEC,PPP1CA,PPP2R2A,PPP2R2B,PRKACA,PRMT2,PSMD2,RPL23,RPS14,SETD1A,SFN,SGF29,SH3GL1,SIRT1,SNCA,SQSTM1,STUB1,TP53,TUBA1A,TUBB,TUBB3,UBTF,VIM,VPS35,YWHAB,YWHAE,YWH…
